# Supplementary material for: Iodoamidation of olefins with chloramine salts and iodine in aqueous media
Source: Royal Society of Chemistry journal article supplement (doi:10.1039/c0cc03855e), 2010-12-07

*Supporting Information for*

**Iodoamidation of Olefins with Chloramine Salts and Iodine in Aqueous Media**

Satoshi Minakata,\* Junpei Hayakawa

Department of Applied Chemistry, Graduate School of Engineering, Osaka University,  
Yamadaoka 2-1, Suita, Osaka 565-0871, Japan

**Table of Contents**

|                                                                                |           |             |
|--------------------------------------------------------------------------------|-----------|-------------|
| Proposed Reaction Mechanism                                                    | -----     | S2          |
| Proposed Reaction Process                                                      | -----     | S3          |
| Cosideration of Regiochemistry & General Methods                               | -----     | S4          |
| Typical Procedure                                                              | -----     | S5          |
| Spectral Data                                                                  | -----     | S6-S13      |
| X-ray Structure Analysis                                                       | -----     | S13-14      |
| References                                                                     | -----     | S14         |
| <br><sup>1</sup> H NMR, <sup>13</sup> C NMR and Mass Spectra of Major Products | <br>----- | <br>S15-S71 |

## Proposed Reaction Mechanism

Although the precise mechanism of the reaction is unclear at present stage, a proposed mechanism is shown in Scheme S1. Since our previous work<sup>S1a</sup> revealed that the reaction with iodine is very rapid, CT reacts immediately with iodine to form the active species **A**. As shown in Scheme 1, **A** acts as an iodonium source to generate the cyclic iodonium intermediate **B** by reaction with an olefin. In fact, the complete stereoselectivity observed in the reactions (Table 2; entries 6-8, Table 3; entries 5-8) support the generation of such an intermediate. The formation of a small amount of iodohydrin in some reactions (Table 2; entries 6 and 8, Table 3; entry 1) also suggests that an iodonium species is generated. The iodoamidated intermediate **C** is formed by an attack of the nitrogen anion on the cyclic iodonium on the ion pair **B**. The liberated NaI would reduce the N-Cl bond on the intermediate **C** to afford the adduct by reaction with water. The pH of the resulting mixture was around 2, which can be explained by the generation of HOCl, produced by the reaction of liberated ICl with NaOH.

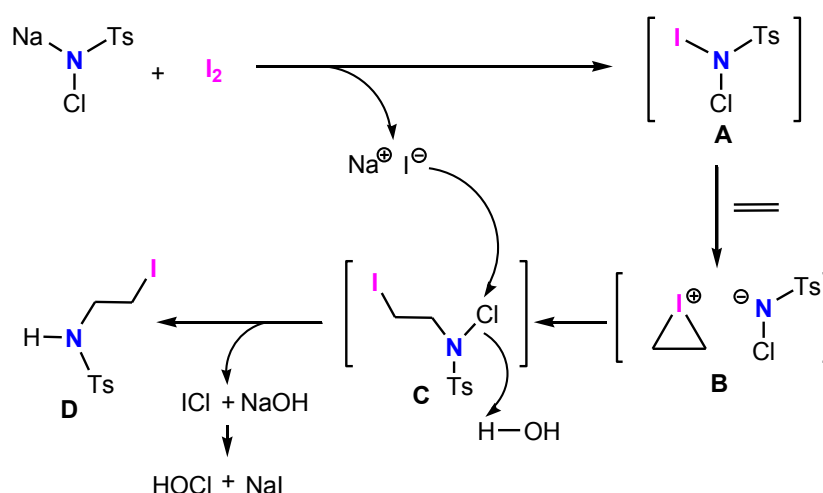

**Scheme S1.** Proposed Reaction Pathway

### Proposed Reaction Process

The proposed mechanism explains why the iodoamidation reaction is specifically induced in aqueous media (Figure 1). Iodine dissolved in olefin layer or water layer reacts with CT to give the species **A**, which rapidly diffuses into olefin layer. In the olefin layer, the reaction of species **A** with the olefin takes place, generating an ion pair consisting of the cyclic iodonium intermediate and the *N*-chloro-*N*-tosyl amide anion, which would rapidly react with each other to give the *N*-chlorinated iodoamide **C**. Since the hydrophilic group, the *N*-chloro-*N*-tosyl group, on intermediate **C** would be located at the interface between the olefin and water layer, sodium iodide in water would attack the chlorine substituent on the nitrogen of **C**, followed by protonation of the amide anion with water. As shown in Table 1, when the reaction was carried out in the absence of water, the amide anion attacks the  $\beta$ -carbon, resulting in the production of aziridines. The use of an acetonitrile-water system (acetonitrile is miscible with water) in the reaction gave an iodohydrine derivative through the attack of water on the cyclic iodonium intermediate, because the ion pair **B** would be stabilized by the high polarity of the co-solvent. In contrast, the use of a hydrophobic organic solvent such as *n*-hexane and  $\text{CH}_2\text{Cl}_2$  gave compounds that were exclusively iodoamidated.

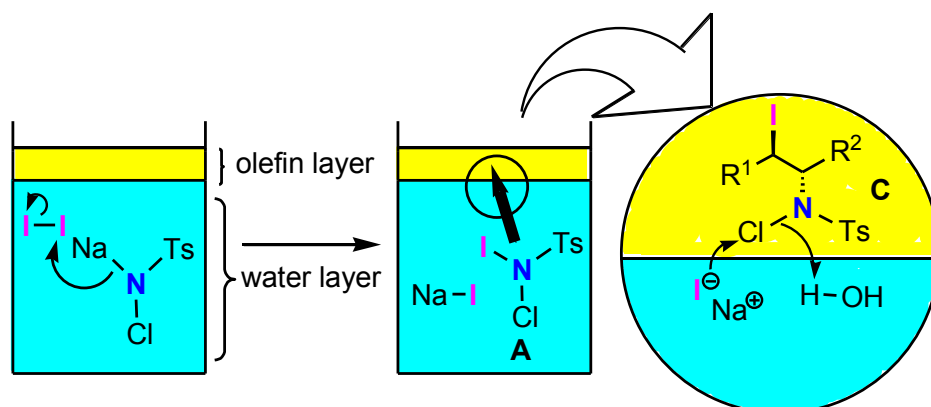

**Figure S1.** Consideration of Regiochemistry

## Consideration of Regiochemistry

Cyclic iodonium intermediates are likely involved in the reaction. In the use of aromatic olefins, the polarity of aqueous media would polarize the benzylic C—I bond. This phenomena would induce the formation of the  $\beta$ -iodinated sulfonamide. As compared with aromatic olefins, aliphatic terminal olefins are not so highly polarized because the positive charge would be shared between the secondary carbon and primary carbon. Thus, a nitrogen nucleophile would attack both the primary carbon and the secondary carbon, leading to the regioisomers. On the other hand, carbonyl groups of electron-deficient olefins would be activated by a iodonium ion acting as a Lewis acid<sup>S2</sup> to induce the 1,4-addition of a nitrogen nucleophile, affording the  $\alpha$ -iodo- $\beta$ -amidated products.

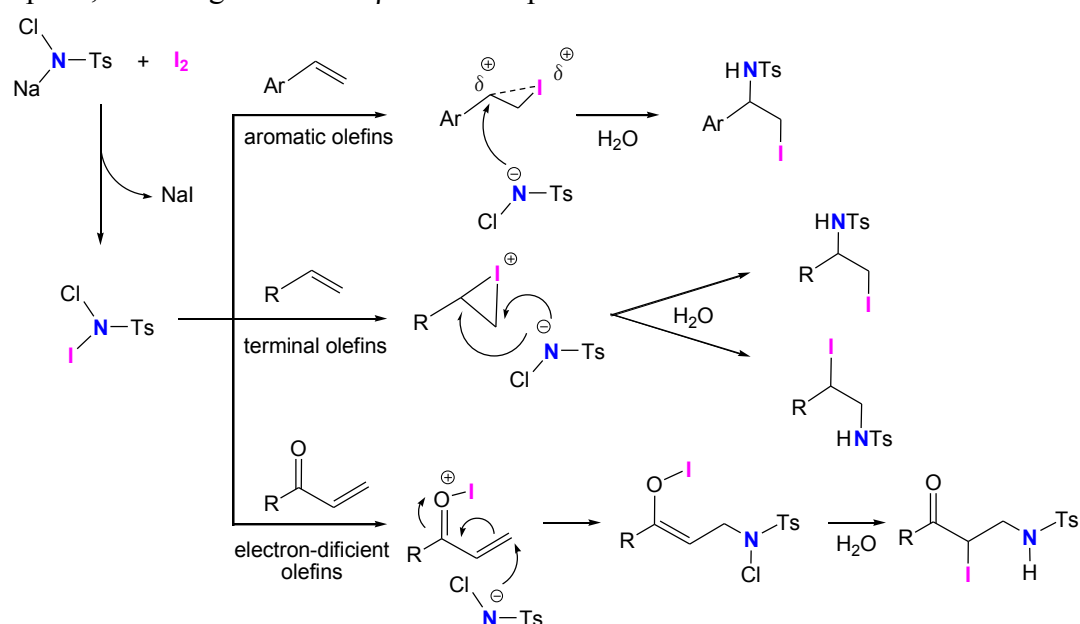

**Scheme S2.** Consideration of Regiochemistry

## General Methods.

Melting points were determined on a Yanaco melting point apparatus and are uncorrected. Infrared spectra were obtained on a JASCO FT/IR-410 infrared spectrophotometer. <sup>1</sup>H and <sup>13</sup>C NMR spectra were recorded on a JEOL FT-NMR JNM EX 270 spectrometer (<sup>1</sup>H NMR, 270 MHz; <sup>13</sup>C NMR, 68 MHz) using tetramethylsilane as an internal standard. Mass spectra were obtained on a JEOL JMS-DX303HF mass spectrometer. Elemental analyses were performed at the Analytical Center, Faculty of Engineering, Osaka University. Products were purified by chromatography on silica gel BW-300 (Fuji Silysia Chemical Co.). Analytical thin-layer chromatography was performed on precoated silica gel glass plates (silica gel 60 F<sub>254</sub>, 0.25 mm thickness) (Merck Co.). Compounds were visualized by UV light or treatment with an ethanolic solution of phosphomolybdic acid followed by heating. Stereochemistry was determined by the conversion of products **6**<sup>S1a</sup>, **7**<sup>S1a</sup>, **15**<sup>S1b, S1c</sup>, and **16**<sup>S1c</sup> to a known aziridines<sup>S1d</sup>

### **Typical procedure for the iodoamidation of styrene derivatives with iodine and chloramine-T**

Styrene (54 mg, 0.5 mmol) was added to a mixture of chloramine-T (281 mg, 1.0 mmol), iodine (126.8 mg, 0.5 mmol), and water (2.0 mL). The mixture was allowed to stir at room temperature for 1 h. The resulting precipitate was collected by suction filtration and dissolved in acetone (15 mL). The solution was dried over Na<sub>2</sub>SO<sub>4</sub> and concentrated to give the crude product. Purification by flash column chromatography (silica gel; ethyl acetate in hexane) gave **1** (147 mg, 73%).

### **Typical procedure for the iodoamidation of styrene derivatives with iodine and chloramine-T in the case of the addition of a small amount of organic solvent**

A small amount of *n*-hexane (100  $\mu$ L) and styrene (54 mg, 0.5 mmol) were added to a mixture of chloramine-T (281 mg, 1.0 mmol), iodine (126.8 mg, 0.5 mmol), and water (2.0 mL). After stirring for 1 h at room temperature, aqueous Na<sub>2</sub>S<sub>2</sub>O<sub>3</sub> (0.5 M, 5 mL) was added to the reaction mixture and the resulting solution was extracted with Et<sub>2</sub>O (20 mL x 3). The combined organic extracts were dried over Na<sub>2</sub>SO<sub>4</sub> and concentrated to give the crude product. Purification by flash column chromatography (silica gel; ethyl acetate in hexane) gave **1** (171 mg, 85%).

### **Typical procedure for the iodoamidation of aliphatic olefins and electron-deficient olefins with chloramine-T**

Ethyl acrylate (100 mg, 0.5 mmol) was added to a mixture of chloramine-T (281 mg, 1.0 mmol), iodine (126.8 mg, 0.5 mmol), and water (2.0 mL). After stirring for 1 h at room temperature, aqueous Na<sub>2</sub>S<sub>2</sub>O<sub>3</sub> (0.5 M, 5 mL) was added to the reaction mixture and the resulting solution was extracted with Et<sub>2</sub>O (20 mL x 3). The combined organic extracts were dried over Na<sub>2</sub>SO<sub>4</sub> and concentrated to give the crude product. Purification by flash column chromatography (silica gel; ethyl acetate in hexane) gave **20** (199 mg, 95%).

### **A Procedure for the one-pot iodoamidation of ethyl acrylate from SESNH<sub>2</sub>**

*t*BuOCl (130 mg, 1.2 mmol) was added to a mixture of SESNH<sub>2</sub> (181 mg, 1.0 mmol), NaOH aq (1 M, 1 mL), and water (1 mL). After stirring for 1 h at room temperature, iodine (126.8 mg, 0.5 mmol) and ethyl acrylate (100 mg, 0.5 mmol) were added to the aqueous solution. After stirring for 1 h at room temperature, aqueous Na<sub>2</sub>S<sub>2</sub>O<sub>3</sub> (0.5 M, 5 mL) was added to the reaction mixture and the resulting solution was extracted with Et<sub>2</sub>O (20 mL x 3). The combined organic extracts were dried over Na<sub>2</sub>SO<sub>4</sub> and concentrated to give the crude product. Purification by flash column chromatography (silica gel; ethyl acetate in hexane) gave **17** (152 mg, 73%).

### 2-iodo-1-phenyl-1-(*p*-toluenesulfonamido)ethane (1)

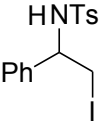 Colorless solid (171 mg, 85%); mp. 126-128 °C; IR (KBr, cm<sup>-1</sup>) 3243, 1324, 1155; <sup>1</sup>H NMR (270 MHz, CDCl<sub>3</sub>) δ 2.38 (s, 3H), 3.36-3.47 (m, 2H), 4.41 (td, 1H, *J* = 6.8, 6.8 Hz), 5.32 (br d, 1H, *J* = 6.8 Hz), 7.06-7.10 (m, 2H), 7.21-7.26 (m, 5H), 7.62 (d, 2H, *J* = 6.8 Hz); <sup>13</sup>C NMR (68 MHz, CDCl<sub>3</sub>) δ 11.2, 21.6, 58.4, 126.3, 127.0, 128.0, 128.5, 129.4, 136.7, 138.3, 143.3; MS (CI, isobutane): *m/z* (relative intensity, %) 402 ([M+H]<sup>+</sup>, 100); HRMS (CI, isobutane): *m/z* calcd for C<sub>15</sub>H<sub>17</sub>INO<sub>2</sub>S (M+H) 400.0025, found 400.0028; Anal. Calcd for C<sub>15</sub>H<sub>16</sub>INO<sub>2</sub>S: C, 44.90; H, 4.02; N, 3.49. Found: C, 45.08; H, 3.76; N, 3.49.

### 2-iodo-1-(4-nitrophenyl)-1-(*p*-toluenesulfonamido)ethane (2)

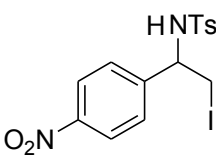 Colorless solid (190 mg, 84%); mp. 165-166 °C; IR (KBr, cm<sup>-1</sup>) 3257, 1512, 1346, 1315, 1157; <sup>1</sup>H NMR (270 MHz, CDCl<sub>3</sub>) δ 2.41 (s, 3H), 3.38 (d, 2H, *J* = 4.3 Hz), 4.52 (td, 1H, *J* = 6.5, 6.5 Hz), 5.32 (br d, 1H, *J* = 6.5 Hz), 7.23-7.26 (m, 2H), 7.34 (d, 2H, *J* = 8.4 Hz), 7.64 (d, 2H, *J* = 8.4 Hz), 8.12 (d, 2H, *J* = 8.4 Hz); <sup>13</sup>C NMR (68 MHz, CDCl<sub>3</sub>) δ 10.3, 21.6, 57.2, 123.7, 127.1, 127.5, 129.6, 136.3, 144.1, 145.6, 147.4; MS (CI, isobutane): *m/z* (relative intensity, %) 447 ([M+H]<sup>+</sup>, 60), 319 ([M-I]<sup>+</sup>, 100); HRMS (CI, isobutane): *m/z* calcd for C<sub>15</sub>H<sub>16</sub>IN<sub>2</sub>O<sub>4</sub>S (M+H) 446.9875, found 446.9863; Anal. Calcd for C<sub>15</sub>H<sub>15</sub>IN<sub>2</sub>O<sub>4</sub>S: C, 40.37; H, 3.39; N, 6.28. Found: C, 40.66; H, 3.34; N, 6.33.

### 2-iodo-1-(4-chlorophenyl)-1-(*p*-toluenesulfonamido)ethane (3)

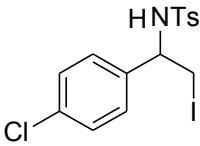 Colorless solid (161 mg, 74%); mp. 156-157 °C; IR (KBr, cm<sup>-1</sup>) 3273, 1331, 1092; <sup>1</sup>H NMR (270 MHz, CDCl<sub>3</sub>) δ 2.41 (s, 3H), 3.37 (d, 2H, *J* = 6.5 Hz), 4.37 (td, 1H, *J* = 6.5, 6.5 Hz), 5.33 (br d, 1H, *J* = 6.5 Hz), 7.03 (d, 2H, *J* = 8.4 Hz), 7.18-7.26 (m, 4H), 7.61 (d, 2H, *J* = 8.4 Hz); <sup>13</sup>C NMR (68 MHz, CDCl<sub>3</sub>) δ 11.3, 21.6, 57.2, 127.1, 127.8, 128.7, 129.5, 134.1, 136.5, 136.8, 143.8; MS (CI, isobutane): *m/z* (relative intensity, %) 438 ([M+H+2]<sup>+</sup>, 27), 436 ([M+H]<sup>+</sup>, 69), 308 ([M-I]<sup>+</sup>, 100); HRMS (CI, isobutane): *m/z* calcd for C<sub>15</sub>H<sub>16</sub>ClINO<sub>2</sub>S (M+H) 434.9557, found 435.9644; Anal. Calcd for C<sub>15</sub>H<sub>15</sub>ClINO<sub>2</sub>S: C, 41.35; H, 3.47; N, 3.21. Found: C, 41.06; H, 3.27; N, 3.23.

**2-iodo-1-(4-methylphenyl)-1-(*p*-toluenesulfonamido)ethane (4)**

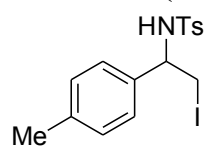 Colorless solid (150 mg, 72%); dec. 154-157 °C; IR (KBr, cm<sup>-1</sup>) 3238, 1331, 1161; <sup>1</sup>H NMR (270 MHz, CDCl<sub>3</sub>) δ 2.29 (s, 3H), 2.40 (s, 3H), 3.35-3.48 (m, 2H), 4.34 (td, 1H, *J* = 6.5, 6.5 Hz), 5.15 (br d, 1H, *J* = 6.5 Hz), 6.96 (d, 2H, *J* = 8.4 Hz), 7.04 (d, 2H, *J* = 8.4 Hz), 7.21 (d, 2H, *J* = 8.4 Hz), 7.64 (d, 2H, *J* = 8.4 Hz); <sup>13</sup>C NMR (68 MHz, CDCl<sub>3</sub>) δ 11.7, 21.2, 21.6, 57.9, 126.2, 127.1, 129.2, 129.4, 135.3, 136.7, 138.1, 143.5; MS (CI, isobutane): *m/z* (relative intensity, %) 416 ([M+H]<sup>+</sup>, 69), 308 ([M-I]<sup>+</sup>, 100); HRMS (CI, isobutane): *m/z* calcd for C<sub>16</sub>H<sub>19</sub>INO<sub>2</sub>S (M+H) 416.0108, found 416.0187; Anal. Calcd for C<sub>16</sub>H<sub>18</sub>INO<sub>2</sub>S: C, 46.27; H, 4.37; N, 3.37. Found: C, 46.18; H, 3.29; N, 3.29.

**2-iodo-1-(4-methoxyphenyl)-1-(*p*-toluenesulfonamido)ethane (5)**

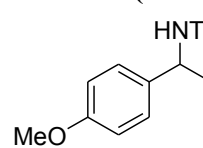 Colorless solid (110 mg, 51%); mp. 123-124 °C; IR (KBr, cm<sup>-1</sup>) 3243, 1315, 1178; <sup>1</sup>H NMR (270 MHz, CDCl<sub>3</sub>) δ 2.41 (s, 3H), 3.35-3.48 (m, 2H), 3.77 (s, 3H), 4.34 (td, 1H, *J* = 6.1, 6.1 Hz), 5.09 (br d, 1H, *J* = 6.1 Hz), 6.76 (d, 2H, *J* = 8.9 Hz), 7.00 (d, 2H, *J* = 8.9 Hz), 7.22 (d, 2H, *J* = 8.4 Hz), 7.63 (d, 2H, *J* = 8.4 Hz); <sup>13</sup>C NMR (68 MHz, CDCl<sub>3</sub>) δ 11.9, 21.6, 55.3, 57.7, 113.9, 127.1, 127.6, 129.5, 130.3, 136.7, 143.5, 159.3; MS (CI, isobutane): *m/z* (relative intensity, %) 454 ([M+Na]<sup>+</sup>, 100), 329 ([M+Na-I]<sup>+</sup>, 98); HRMS (CI, isobutane): *m/z* calcd for C<sub>16</sub>H<sub>18</sub>I NO<sub>3</sub>SSNa (M+Na) 453.9950, found 453.9943; Anal. Calcd for C<sub>16</sub>H<sub>18</sub>I NO<sub>3</sub>SSNa: C, 44.56; H, 4.21; N, 3.25. Found: C, 44.60; H, 3.98; N, 3.21.

**(±)-*trans*-1-iodo-2-phenyl-2-(*p*-toluenesulfonamido)propane (6)**

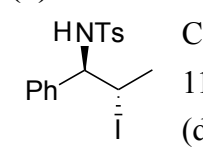 Colorless solid (139 mg, 67%); mp. 145-146 °C; IR (KBr, cm<sup>-1</sup>) 3276, 1325, 1165; <sup>1</sup>H NMR (270 MHz, CDCl<sub>3</sub>) δ 1.78 (d, 3H, *J* = 7.0 Hz), 2.34 (s, 3H), 4.19 (dd, 1H, *J* = 5.1, 8.4 Hz), 4.41-4.45 (m, 1H), 5.34 (br d, 1H, *J* = 8.4 Hz), 7.04-7.21 (m, 7H), 7.54 (d, 2H, *J* = 8.4 Hz); <sup>13</sup>C NMR (68 MHz, CDCl<sub>3</sub>) δ 21.5, 24.5, 33.0, 63.2, 127.0, 127.3, 127.9, 127.9, 129.2, 136.8, 136.8, 143.2; MS (CI, isobutane): *m/z* (relative intensity, %) 416 ([M+H]<sup>+</sup>, 100), 288 ([M-I]<sup>+</sup>, 55); HRMS (CI, isobutane): *m/z* Calcd for C<sub>16</sub>H<sub>19</sub>INO<sub>2</sub>S (M+H) 416.0181, found 416.0174.

**(±)-*cis*-1-iodo-2-phenyl-2-(*p*-toluenesulfonamido)propane (7)**

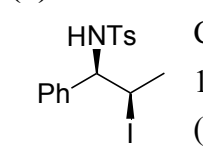 Colorless solid (206 mg, 99%); dec. 130-131 °C; IR (KBr, cm<sup>-1</sup>) 3261, 1321, 1163; <sup>1</sup>H NMR (270 MHz, CDCl<sub>3</sub>) δ 1.89 (d, 3H, *J* = 7.0 Hz), 2.34 (s, 3H), 4.11 (dd, 1H, *J* = 4.9, 8.4 Hz), 4.24-4.33 (m, 1H), 5.31 (br d, 1H, *J* = 8.4 Hz), 7.02-7.28 (m, 7H), 7.56 (d, 2H, *J* = 8.4 Hz); <sup>13</sup>C NMR (68 MHz, CDCl<sub>3</sub>) δ 21.4, 26.1, 35.8, 63.5, 126.5, 127.0, 127.8, 128.2, 129.3, 137.3, 138.5, 143.3; MS (CI, isobutane): *m/z* (relative intensity, %) 416 ([M+H]<sup>+</sup>, 85), 288 ([M-I]<sup>+</sup>, 100); HRMS (CI, isobutane): *m/z* Calcd for C<sub>16</sub>H<sub>19</sub>INO<sub>2</sub>S (M+H) 416.0181, found 416.0172.

**(±)-trans-2-iodo-1-(*p*-toluenesulfonamido)indane (8)**

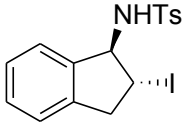 Colorless solid (198 mg, 96%); dec. 143-144 °C; IR (KBr, cm<sup>-1</sup>) 3269, 1335, 1159; <sup>1</sup>H NMR (270 MHz, CDCl<sub>3</sub>) δ 2.47 (s, 3H), 3.25 (dd, 1H, *J* = 6.2, 16.7 Hz), 3.58 (dd, 1H, *J* = 6.2, 16.7 Hz), 4.24 (q, 1H, *J* = 6.2 Hz), 4.90 (br d, 1H, *J* = 3.8 Hz), 4.95-4.97 (m, 1H), 7.14-7.37 (m, 6H), 7.85 (d, 2H, *J* = 7.8 Hz); <sup>13</sup>C NMR (68 MHz, CDCl<sub>3</sub>) δ 21.7, 26.5, 43.0, 68.7, 124.4, 124.5, 127.4, 127.7, 129.0, 129.7, 137.2, 139.6, 141.0, 143.8; MS (CI, isobutane): *m/z* (relative intensity, %) 414 ([M+H]<sup>+</sup>, 100), 286 ([M-I]<sup>+</sup>, 36); HRMS (CI, isobutane): *m/z* Calcd for C<sub>16</sub>H<sub>17</sub>INO<sub>2</sub>S (M+H) 414.0025, found 414.0020; Anal. Calcd for C<sub>16</sub>H<sub>16</sub>INO<sub>2</sub>S: C, 46.5; H, 3.90; N, 3.39. Found: C, 46.47; H, 3.79; N, 3.47.

**1-iodo-2-phenyl-2-(*p*-toluenesulfonamido)propane (9)**

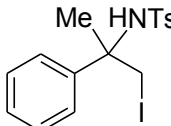 Colorless solid (154 mg, 74%); mp. 92-93 °C; IR (KBr, cm<sup>-1</sup>) 3263, 1317, 1149; <sup>1</sup>H NMR (270 MHz, CDCl<sub>3</sub>) δ 1.76 (s, 3H), 2.41 (s, 3H), 3.59 (d, 1H, *J* = 10.3 Hz), 3.75 (d, 1H, *J* = 10.3 Hz), 5.23 (br s, 1H), 7.19-7.30 (m, 7H), 7.63 (d, 2H, *J* = 8.4 Hz); <sup>13</sup>C NMR (68 MHz, CDCl<sub>3</sub>) δ 20.9, 21.5, 26.2, 60.0, 125.6, 126.8, 127.6, 128.2, 129.2, 139.1, 141.1, 142.9; MS (CI, isobutane): *m/z* (relative intensity, %) 416 ([M+H]<sup>+</sup>, 100), 288 ([M-I]<sup>+</sup>, 75); HRMS (CI, isobutane): *m/z* calcd for C<sub>16</sub>H<sub>19</sub>INO<sub>2</sub>S (M+H) 416.0181, found 416.0178; Anal. Calcd for C<sub>16</sub>H<sub>18</sub>INO<sub>2</sub>S: C, 46.27; H, 4.37; N, 3.37. Found: C, 46.39; H, 4.13; N, 3.29.

**2-iodo-1-(*p*-toluenesulfonamido)octane (10a)<sup>S3</sup>**

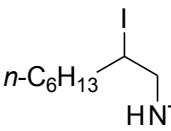 Colorless oil (97 mg, 48%); IR (neat, cm<sup>-1</sup>) 3452, 1327, 1159; <sup>1</sup>H NMR (270 MHz, CDCl<sub>3</sub>) δ 0.88 (t, 3H, *J* = 6.5 Hz), 1.24-1.78 (m, 10H), 2.44 (s, 3H), 3.19-3.34 (m, 2H), 3.97-4.01 (m, 1H), 4.65 (br t, 1H, *J* = 6.5 Hz), 7.32 (d, 2H, *J* = 8.4 Hz), 7.75 (d, 2H, *J* = 8.4 Hz); <sup>13</sup>C NMR (68 MHz, CDCl<sub>3</sub>) δ 14.1, 21.6, 22.6, 28.4, 29.2, 31.6, 36.1, 37.3, 50.1, 126.9, 129.7, 136.8, 143.6; MS (CI, isobutane): *m/z* (relative intensity, %) 410 ([M+H]<sup>+</sup>, 100), 282 ([M-I]<sup>+</sup>, 40); HRMS (CI, isobutane): *m/z* Calcd for C<sub>15</sub>H<sub>25</sub>INO<sub>2</sub>S (M+H) 410.0651, found 410.0634.

**1-iodo-2-(*p*-toluenesulfonamido)octane (10b)<sup>S4</sup>**

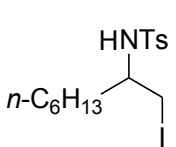 Colorless solid (76 mg, 37%); mp. 91-92 °C; IR (neat, cm<sup>-1</sup>) 3277, 1331, 1159; <sup>1</sup>H NMR (270 MHz, CDCl<sub>3</sub>) δ 0.85 (t, 3H, *J* = 6.8 Hz), 1.14-1.25 (m, 8H), 1.35-1.60 (m, 2H), 2.43 (s, 3H), 2.89-3.00 (m, 1H), 3.13-3.26 (m, 2H), 4.66 (br d, 1H, *J* = 8.4 Hz), 7.31 (d, 2H, *J* = 8.4 Hz), 7.77 (d, 2H, *J* = 8.4 Hz); <sup>13</sup>C NMR (68 MHz, CDCl<sub>3</sub>) δ 14.1, 15.0, 21.6, 22.5, 25.2, 28.7, 31.6, 35.6, 52.5, 126.9, 129.6, 137.7, 143.5; MS (CI, isobutane): *m/z* (relative intensity, %) 410 ([M+H]<sup>+</sup>, 93), 282 ([M-I]<sup>+</sup>, 100); HRMS (CI, isobutane): *m/z* Calcd for C<sub>15</sub>H<sub>25</sub>INO<sub>2</sub>S (M+H) 410.0651, found 410.0642.



### 1-ethoxy-2-iodo-3-(*p*-toluenesulfonamido)propane (11a)

Colorless solid (101 mg, 53%); mp. 45-46 °C; IR (KBr, cm<sup>-1</sup>) 3284, 1331, 1159; <sup>1</sup>H NMR (270 MHz, CDCl<sub>3</sub>) δ 1.18 (t, 3H, *J* = 7.0 Hz), 2.44 (s, 3H), 3.35-3.74 (m, 6H), 4.08-4.17 (m, 1H), 5.24 (br t, 1H, *J* = 6.2 Hz), 7.32 (d, 2H, *J* = 8.4 Hz), 7.75 (d, 2H, *J* = 8.4 Hz); <sup>13</sup>C NMR (100 MHz, CDCl<sub>3</sub>) δ 15.1, 21.6, 25.8, 48.8, 66.6, 74.2, 126.9, 129.7, 136.7, 143.5; MS (CI, isobutane): *m/z* (relative intensity, %) 384 ([M+H]<sup>+</sup>, 100), 338 ([M-OEt]<sup>+</sup>, 42), 256 ([M-I]<sup>+</sup>, 18); HRMS (CI, isobutane): *m/z* Calcd for C<sub>12</sub>H<sub>19</sub>INO<sub>3</sub>S (M+H) 384.0130, found 384.0115; Anal. Calcd for C<sub>12</sub>H<sub>19</sub>INO<sub>3</sub>S: C, 37.61; H, 4.73; N, 3.65. Found: C, 37.58; H, 4.54; N, 3.55.

### 1-ethoxy-3-iodo-2-(*p*-toluenesulfonamido)propane (11b)

Colorless solid (59 mg, 31%); mp. 55-56 °C; IR (KBr, cm<sup>-1</sup>) 3196, 1333, 1157; <sup>1</sup>H NMR (270 MHz, CDCl<sub>3</sub>) δ 1.09 (t, 3H, *J* = 7.02 Hz), 2.44 (s, 3H), 3.18-3.90 (m, 7H), 5.08 (br d, 1H, *J* = 7.3 Hz), 7.31 (d, 2H, *J* = 8.4 Hz), 7.77 (d, 2H, *J* = 8.4 Hz); <sup>13</sup>C NMR (100 MHz, CDCl<sub>3</sub>) δ 7.95, 15.2, 21.6, 53.1, 66.8, 70.4, 127.0, 129.7, 137.2, 143.6; MS (CI, isobutane): *m/z* (relative intensity, %) 384 ([M+H]<sup>+</sup>, 100), 256 ([M-I]<sup>+</sup>, 21); HRMS (CI, isobutane): *m/z* Calcd for C<sub>12</sub>H<sub>19</sub>INO<sub>3</sub>S (M+H) 384.0130, found 384.0121.

### 2-iodo-3-(*p*-toluenesulfonamido)propyl acetate (12a)

Colorless oil (141 mg, 71%); IR (KBr, cm<sup>-1</sup>) 3291, 1741, 1331, 1159; <sup>1</sup>H NMR (270 MHz, CDCl<sub>3</sub>) δ 2.07 (s, 3H), 2.44 (s, 3H), 3.31 (t, 2H, 6.5 Hz), 4.11-4.22 (m, 2H), 4.36-4.46 (m, 1H), 5.15 (br t, 2H, *J* = 6.5 Hz), 7.33 (d, 2H, *J* = 8.1 Hz), 7.76 (d, 2H, *J* = 8.1 Hz); <sup>13</sup>C NMR (100 MHz, CDCl<sub>3</sub>) δ 20.8, 21.6, 26.6, 47.6, 65.9, 126.9, 129.8, 136.6, 143.7, 170.2; MS (CI, isobutane): *m/z* (relative intensity, %) 398 ([M+H]<sup>+</sup>, 59), 338 ([M-OCOCH<sub>3</sub>]<sup>+</sup>, 100), 270 ([M-I]<sup>+</sup>, 26); HRMS (CI, isobutane): *m/z* Calcd for C<sub>12</sub>H<sub>17</sub>INO<sub>4</sub>S (M+H) 397.9923, found 397.9917.

### 1-bromo-2-iodo-3-(*p*-toluenesulfonamido)propane (13a)

Colorless oil (123 mg, 59%); IR (KBr, cm<sup>-1</sup>) 3280, 1331, 1159; <sup>1</sup>H NMR (270 MHz, CDCl<sub>3</sub>) δ 2.44 (s, 3H), 3.28-3.39 (m, 1H), 3.45-3.54 (m, 1H), 3.72 (t, 1H, *J* = 10.3 Hz), 3.92 (dd, 1H, *J* = 6.5, 10.3 Hz), 4.26-4.33 (m, 1H), 5.04 (br t, 1H, *J* = 6.5 Hz), 7.33 (d, 2H, *J* = 8.4 Hz), 7.78 (d, 2H, *J* = 8.4 Hz); <sup>13</sup>C NMR (100 MHz, CDCl<sub>3</sub>) δ 21.6, 28.9, 34.7, 48.6, 127.0, 129.8, 136.5, 143.8; MS (CI, isobutane): *m/z* (relative intensity, %) 420 ([M+H+2]<sup>+</sup>, 33), 418 ([M+H]<sup>+</sup>, 31), 212 ([M-I-Br]<sup>+</sup>, 100); HRMS (CI, isobutane): *m/z* Calcd for C<sub>10</sub>H<sub>14</sub>BrINO<sub>2</sub>S (M+H) 417.8973, found 417.8969.

### 1-bromo-3-iodo-2-(*p*-toluenesulfonamido)propane (13b)

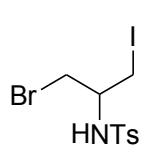

Colorless oil (29 mg, 14%); IR (neat,  $\text{cm}^{-1}$ ) 3269, 1331, 1157;  $^1\text{H}$  NMR (270 MHz,  $\text{CDCl}_3$ )  $\delta$  2.45 (s, 3H), 3.09-3.43 (m, 4H), 3.61-3.66 (m, 1H), 5.04 (br s, 1H), 7.33 (d, 2H,  $J = 8.4$  Hz), 7.78 (d, 2H,  $J = 8.4$  Hz);  $^{13}\text{C}$  NMR (100 MHz,  $\text{CDCl}_3$ )  $\delta$  8.3, 21.7, 35.8, 53.3, 127.0, 129.9, 136.9, 144.1; MS (CI, isobutane):  $m/z$  (relative intensity, %) 420 ( $[\text{M}+\text{H}+2]^+$ , 92), 418 ( $[\text{M}+\text{H}]^+$ , 91), 338 ( $[\text{M}-\text{Br}]^+$ , 100), 292 ( $[\text{M}-\text{I}+2]^+$ , 43), 290 ( $[\text{M}-\text{I}]^+$ , 45), 212 ( $[\text{M}-\text{I}-\text{Br}]^+$ , 17); HRMS (CI, isobutane):  $m/z$  Calcd for  $\text{C}_{10}\text{H}_{14}\text{BrINO}_2\text{S}$  (M+H) 417.8973, found 417.8975.

### (3*R*\*,4*S*\*)-3-iodo-4-(*p*-toluenesulfonamido)hexane (14)

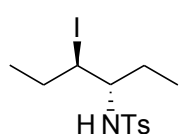

Colorless solid (116 mg, 61%); mp. 110-111 °C; IR (KBr,  $\text{cm}^{-1}$ ) 3277, 1325, 1163;  $^1\text{H}$  NMR (400 MHz,  $\text{CDCl}_3$ )  $\delta$  0.81 (t, 3H,  $J = 7.3$  Hz), 0.94 (t, 3H,  $J = 7.3$  Hz), 1.33-1.42 (m, 1H), 1.52-1.68 (m, 2H), 1.80-1.86 (m, 1H), 2.44-2.54 (m, 4H), 3.89-3.96 (m, 1H), 4.67 (br d, 1H,  $J = 9.5$  Hz), 7.31 (d, 2H,  $J = 8.4$  Hz), 7.76 (d, 2H,  $J = 8.4$  Hz);  $^{13}\text{C}$  NMR (100 MHz,  $\text{CDCl}_3$ )  $\delta$  10.1, 14.6, 21.6, 26.0, 31.1, 49.8, 59.1, 126.8, 129.5, 138.0, 143.4; MS (CI, isobutane):  $m/z$  (relative intensity, %) 382 ( $[\text{M}+\text{H}]^+$ , 96), 254 ( $[\text{M}-\text{I}]^+$ , 23); HRMS (CI, isobutane):  $m/z$  Calcd for  $\text{C}_{13}\text{H}_{21}\text{INO}_2\text{S}$  (M+H) 382.0338, found 382.0333; Anal. Calcd for  $\text{C}_{13}\text{H}_{20}\text{INO}_2\text{S}$ : C, 40.95; H, 5.29; N, 3.67. Found: C, 41.24; H, 5.10; N, 3.68.

### (3*R*\*,4*R*\*)-3-iodo-4-(*p*-toluenesulfonamido)hexane (15)

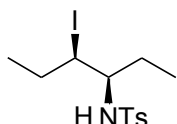

Colorless solid (176 mg, 92%); mp. 115-116 °C; IR (KBr,  $\text{cm}^{-1}$ ) 3253, 1333, 1160;  $^1\text{H}$  NMR (400 MHz,  $\text{CDCl}_3$ )  $\delta$  0.71 (t, 3H,  $J = 7.6$  Hz), 0.97 (t, 3H,  $J = 7.3$  Hz), 1.38-1.88 (m, 4H), 2.43 (s, 3H), 2.72 (td, 1H,  $J = 6.8, 6.8$  Hz), 3.97-4.01 (m, 1H), 4.64 (br d, 1H,  $J = 9.5$  Hz), 7.29 (d, 2H,  $J = 8.4$  Hz), 7.76 (d, 2H,  $J = 8.4$  Hz);  $^{13}\text{C}$  NMR (100 MHz,  $\text{CDCl}_3$ )  $\delta$  10.5, 14.7, 21.6, 29.8, 30.8, 46.5, 59.3, 126.8, 129.5, 138.3, 143.3; MS (CI, isobutane):  $m/z$  (relative intensity, %) 382 ( $[\text{M}+\text{H}]^+$ , 100), 254 ( $[\text{M}-\text{I}]^+$ , 33); HRMS (CI, isobutane):  $m/z$  Calcd for  $\text{C}_{13}\text{H}_{21}\text{INO}_2\text{S}$  (M+H) 328.0338, found 382.0326; Anal. Calcd for  $\text{C}_{13}\text{H}_{20}\text{INO}_2\text{S}$ : C, 40.95; H, 5.29 N, 3.67. Found: C, 41.02; H, 5.01; N, 3.67.

### (±) *trans*-2-iodo-1-(*p*-toluenesulfonamide)cyclopentane (16)

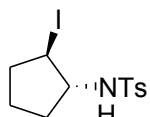

Colorless oil (151 mg, 83%); IR (KBr,  $\text{cm}^{-1}$ ) 3245, 1323, 1157;  $^1\text{H}$  NMR (270 MHz,  $\text{CDCl}_3$ )  $\delta$  1.37-1.48 (m, 1H), 1.68-1.81 (m, 2H), 1.92-2.44 (m, 3H), 2.44 (s, 3H), 3.70-3.77 (m, 1H), 4.00-4.08 (m, 1H), 5.35 (br d, 1H,  $J = 6.5$  Hz), 7.31 (d, 2H,  $J = 8.4$  Hz), 7.78 (d, 2H,  $J = 8.4$  Hz);  $^{13}\text{C}$  NMR (68 MHz,  $\text{CDCl}_3$ )  $\delta$  21.6, 22.5, 30.0, 30.7, 36.0, 64.5, 127.2, 129.7, 136.7, 143.6; MS (CI, isobutane):  $m/z$  (relative intensity, %) 366 ( $[\text{M}+\text{H}]^+$ , 100), 238 ( $[\text{M}-\text{I}]^+$ , 61); HRMS (CI, isobutane):  $m/z$  Calcd for  $\text{C}_{12}\text{H}_{16}\text{INO}_2\text{S}$  (M+H) 364.9946, found 364.9950.

**(±) *trans*-4-iodo-3-(*p*-toluenesulfonamide)cyclohexene (17)**

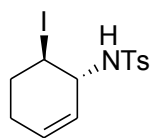

Colorless solid (176 mg, 92%); mp. 84-85 °C; IR (KBr,  $\text{cm}^{-1}$ ) 3255, 1331, 1163;  $^1\text{H}$  NMR (400 MHz,  $\text{CDCl}_3$ )  $\delta$  1.82-1.98 (m, 2H), 2.09-2.18 (m, 2H), 2.45 (s, 3H), 4.01 (br, 1H), 4.37-4.41 (m, 1H), 4.88 (br d, 1H,  $J = 7.3$  Hz), 5.32-5.36 (m, 1H), 5.86-5.89 (m, 1H), 7.33 (d, 2H,  $J = 8.4$  Hz), 7.78 (d, 2H,  $J = 8.4$  Hz);  $^{13}\text{C}$  NMR (100 MHz,  $\text{CDCl}_3$ )  $\delta$  21.7, 24.1, 27.9, 30.3, 55.7, 122.7, 127.0, 129.8, 131.4, 137.0, 143.7; MS (CI, isobutane):  $m/z$  (relative intensity, %) 378 ( $[\text{M}+\text{H}]^+$ , 100), 250 ( $[\text{M}-\text{I}]^+$ , 23); HRMS (CI, isobutane):  $m/z$  Calcd for  $\text{C}_{13}\text{H}_{21}\text{INO}_2\text{S}$  ( $\text{M}+\text{H}$ ) 378.0025, found 378.0020.

Regiochemistry was determined by 2D NMR.

**2-iodo-3-oxo-1-(*p*-toluenesulfonamido)butane (18)**

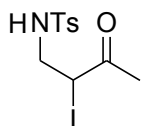

Colorless solid (125 mg, 68%); IR (KBr,  $\text{cm}^{-1}$ ) 3288, 1706, 1329, 1159;  $^1\text{H}$  NMR (270 MHz,  $\text{CDCl}_3$ )  $\delta$  2.40 (s, 3H), 2.43 (s, 3H), 3.26-3.34 (m, 1H), 3.40-3.51 (m, 1H), 4.72 (dd, 1H,  $J = 5.0, 9.3$  Hz), 5.51 (br, 1H), 7.32 (d, 2H,  $J = 8.4$  Hz), 7.73 (d, 2H,  $J = 8.4$  Hz);  $^{13}\text{C}$  NMR (68 MHz,  $\text{CDCl}_3$ )  $\delta$  21.5, 27.3, 27.5, 46.0, 126.8, 129.7, 136.5, 143.6, 202.3; MS (CI, isobutane):  $m/z$  (relative intensity, %) 368 ( $[\text{M}+\text{H}]^+$ , 100), 240 ( $[\text{M}-\text{I}]^+$ , 60); HRMS (CI, isobutane):  $m/z$  calcd for  $\text{C}_{11}\text{H}_{15}\text{INO}_3\text{S}$  ( $\text{M}+\text{H}$ ) 367.9817, found 367.9813.

**ethyl 2-iodo-3-(*p*-toluenesulfonamido)propanoate (19)**

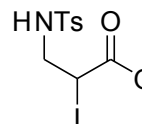

Colorless crystal (189 mg, 95%); mp. 45-47 °C; IR (KBr,  $\text{cm}^{-1}$ ) 3290, 1730, 1331, 1161;  $^1\text{H}$  NMR (270 MHz,  $\text{CDCl}_3$ )  $\delta$  1.27 (t, 3H,  $J = 7.0$  Hz), 2.44 (s, 3H), 3.37-3.46 (m, 2H), 4.20 (q, 2H,  $J = 7.0$  Hz), 4.49 (dd, 1H,  $J = 5.4, 9.2$  Hz), 5.24 (br, 1H), 7.32 (d, 2H,  $J = 8.1$  Hz), 7.73 (d, 2H,  $J = 8.1$  Hz);  $^{13}\text{C}$  NMR (68 MHz,  $\text{CDCl}_3$ )  $\delta$  13.8, 16.9, 21.6, 47.2, 62.4, 126.8, 129.8, 136.7, 143.7, 170.4; MS (CI, isobutane):  $m/z$  (relative intensity, %) 398 ( $[\text{M}+\text{H}]^+$ , 100), 270 ( $[\text{M}-\text{I}]^+$ , 64); HRMS (CI, isobutane):  $m/z$  Calcd for  $\text{C}_{12}\text{H}_{17}\text{INO}_4\text{S}$  ( $\text{M}+\text{H}$ ) 397.9923, found 397.9928.

**2-iodo-*N,N*-dimethyl-3-(*p*-toluenesulfonamido)propanamide (20)**

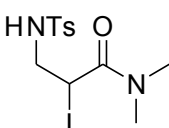

Colorless solid (164 mg, 83%); mp. 109-110 °C; IR (KBr,  $\text{cm}^{-1}$ ) 3201, 1637, 1331, 1161;  $^1\text{H}$  NMR (270 MHz,  $\text{CDCl}_3$ )  $\delta$  2.43 (s, 3H), 2.95 (s, 3H), 2.97 (s, 3H), 3.33-3.43 (m, 1H), 3.52-3.63 (m, 1H), 4.61 (dd, 1H,  $J = 4.7, 10.1$  Hz), 5.79 (br, 1H), 7.31 (d, 2H,  $J = 8.1$  Hz), 7.73 (d, 2H,  $J = 8.1$  Hz);  $^{13}\text{C}$  NMR (68 MHz,  $\text{CDCl}_3$ )  $\delta$  17.0, 21.6, 36.4, 37.8, 47.7, 126.7, 129.6, 136.9, 143.4, 168.6; MS (CI, isobutane):  $m/z$  (relative intensity, %) 397 ( $[\text{M}+\text{H}]^+$ , 100), 269 ( $[\text{M}-\text{I}]^+$ , 27); HRMS (CI):  $m/z$  calcd for  $\text{C}_{12}\text{H}_{18}\text{IN}_2\text{O}_3\text{S}$  ( $\text{M}+\text{H}$ ) 397.0083, found 397.0084; Anal. Calcd for  $\text{C}_{12}\text{H}_{17}\text{IN}_2\text{O}_3\text{S}$ : C, 36.37; H, 4.32; N, 7.07. Found: C, 36.46; H, 4.03; N, 7.04.

***N*-(2-nitro-1-phenylethyl)toluenesulfonamide (21)<sup>S5</sup>**

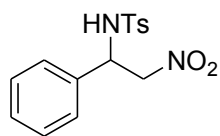

Colorless solid (158 mg, 99%); IR (KBr,  $\text{cm}^{-1}$ ) 3251, 1544, 1381, 1323, 1161; mp. 156-157 °C;  $^1\text{H}$  NMR (270 MHz,  $\text{CDCl}_3$ )  $\delta$  2.40 (s, 3H), 4.60 (dd, 1H,  $J = 6.5, 13.2$  Hz), 4.82 (dd, 1H,  $J = 6.8, 13.2$  Hz), 4.95-5.00 (m, 1H), 5.54 (br d, 1H,  $J = 7.6$  Hz), 7.08 (d, 2H,  $J = 8.1$  Hz), 7.20-7.26 (m, 5H), 7.64 (d, 2H,  $J = 8.1$  Hz);  $^{13}\text{C}$  NMR (68 MHz,  $\text{CDCl}_3$ )  $\delta$  21.6, 55.4, 78.9, 126.3, 127.0, 128.9, 129.1, 129.6, 135.1, 136.3, 143.9; MS (CI, isobutane):  $m/z$  (relative intensity, %) 321 ( $[\text{M}+\text{H}]^+$ , 3), 260 ( $[\text{M}-\text{CH}_2\text{NO}_2]^+$ , 34), 172 ( $[\text{TsNH}_2+\text{H}]^+$ , 100); HRMS (CI, isobutane):  $m/z$  Calcd for  $\text{C}_{15}\text{H}_{17}\text{N}_2\text{O}_4\text{S}$  ( $\text{M}+\text{H}$ ) 321.0909, found 321.0913; Anal. Calcd for  $\text{C}_{15}\text{H}_{17}\text{N}_2\text{O}_4\text{S}$ : C, 56.24; H, 5.03; N, 8.74. Found: C, 56.00; H, 4.77; N, 8.66.

**2-iodo-1-(4-nitrophenyl)-1-(2-(trimethylsilyl)ethylsulfonamido)ethane (22)**

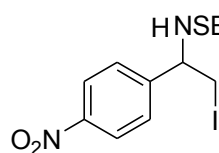

Colorless solid (192 mg, 82%); mp. 129-130 °C; IR (KBr,  $\text{cm}^{-1}$ ) 3274, 1519, 1346, 1273, 1137;  $^1\text{H}$  NMR (270 MHz,  $\text{CDCl}_3$ )  $\delta$  -0.01 (s, 9H), 0.94-1.04 (m, 2H), 2.81-2.92 (m, 2H), 2.93-3.00 (m, 2H), 3.46 (td, 1H,  $J = 6.8, 6.8$  Hz), 3.58 (td, 1H,  $J = 6.8, 6.8$  Hz), 4.73-4.78 (m, 1H), 5.12 (br d, 1H,  $J = 7.8$  Hz), 7.54 (d, 2H,  $J = 8.6$  Hz), 8.26 (d, 2H,  $J = 8.6$  Hz);  $^{13}\text{C}$  NMR (68 MHz,  $\text{CDCl}_3$ )  $\delta$  -1.9, 10.6, 10.9, 50.7, 57.5, 124.1, 127.4, 146.6, 147.7; MS (CI, isobutane):  $m/z$  (relative intensity, %) 457 ( $[\text{M}+\text{H}]^+$ , 2), 443 ( $[\text{M}-\text{CH}_3+2]^+$ , 10), 442 ( $[\text{M}-\text{CH}_3+1]^+$ , 19), 441 ( $[\text{M}-\text{CH}_3]^+$ , 100), 313 ( $[\text{M}-\text{CH}_3-\text{I}]^+$ , 100); HRMS (CI, isobutane):  $m/z$  Calcd for  $\text{C}_{13}\text{H}_{22}\text{IN}_2\text{O}_4\text{SSi}$  ( $\text{M}+\text{H}$ ) 457.0114, found 457.0096.

**(3*R*\*,4*R*\*)-3-iodo-4-(2-(trimethylsilyl)ethylsulfonamido)hexane (23)**

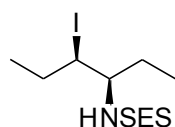

Colorless solid (190 mg, 97%); mp. 79-80 °C; IR (KBr,  $\text{cm}^{-1}$ ) 3257, 1315, 1142;  $^1\text{H}$  NMR (400 MHz,  $\text{CDCl}_3$ )  $\delta$  0.06 (s, 9H), 0.95 (t, 3H,  $J = 11.2$  Hz), 1.04-1.10 (m, 5H), 1.67 (td, 2H,  $J = 7.3, 7.3$  Hz), 1.81-2.12 (m, 2H), 2.77-2.82 (m, 1H), 2.97 (td, 2H,  $J = 5.9, 5.9$  Hz), 4.11-4.17 (m, 1H), 4.28 (br d, 1H,  $J = 4.9$  Hz);  $^{13}\text{C}$  NMR (100 MHz,  $\text{CDCl}_3$ )  $\delta$  -1.86, 10.7, 10.9, 14.7, 31.1, 31.5, 47.3, 51.0, 59.3; MS (CI, isobutane):  $m/z$  (relative intensity, %) 392 ( $[\text{M}+\text{H}]^+$ , 11), 378 ( $[\text{M}-\text{CH}_3+2]^+$ , 9), 377 ( $[\text{M}-\text{CH}_3+1]^+$ , 16), 376 ( $[\text{M}-\text{CH}_3]^+$ , 100), 254 ( $[\text{M}-\text{I}]^+$ , 3); HRMS (CI, isobutane):  $m/z$  Calcd for  $\text{C}_{13}\text{H}_{21}\text{INO}_2\text{S}$  ( $\text{M}+\text{H}$ ) 392.0576, found 392.0580.

**ethyl 2-iodo-3-(2-(trimethylsilyl)ethylsulfonamido)propanoate (24)**

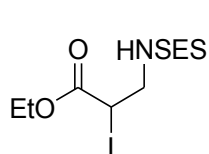

Colorless oil (149 mg, 73%); IR (KBr,  $\text{cm}^{-1}$ ) 3217, 1726, 1323, 1257, 1140;  $^1\text{H}$  NMR (270 MHz,  $\text{CDCl}_3$ )  $\delta$  0.07 (s, 9H), 0.98-1.05 (m, 2H), 1.30 (t, 3H,  $J = 7.3$  Hz), 2.93-3.00 (m, 2H), 3.53-3.63 (m, 2H), 4.20-4.29 (m, 2H), 4.56 (dd, 1H,  $J = 3.5$  Hz, 9.7 Hz), 5.02 (br t, 1H,  $J = 6.8$  Hz);  $^{13}\text{C}$  NMR (68 MHz,  $\text{CDCl}_3$ )  $\delta$  -1.9, 10.7, 13.8, 17.7, 47.4, 49.8, 62.4, 170.5; MS (CI, isobutane):  $m/z$  (relative intensity, %) 408 ( $[\text{M}+\text{H}]^+$ , 50), 270 ( $[\text{M}-\text{I}]^+$ , 64); HRMS (CI, isobutane):  $m/z$  Calcd for  $\text{C}_{10}\text{H}_{23}\text{INO}_4\text{SSi}$  ( $\text{M}+\text{H}$ ) 408.0162, found 408.0174.

**X-ray Structure Analysis.**

All measurements were made on a Rigaku RAXIS-RAPID Imaging Plate diffractometer with graphite monochromated Cu  $\text{K}\alpha$  radiation. The structure of **8** was solved by direct methods and expanded using Fourier techniques. The non-hydrogen atoms were refined anisotropically. The H atoms were placed in idealized positions and allowed to ride with the C atoms to which each was bonded. Crystallographic details are summarized in Table S1. Crystallographic data (excluding structure factors) for the structures reported in this paper have been deposited with the Cambridge Crystallographic Data Centre as supplementary publication no. CCDC-778523 for **8**. Copies of the data can be obtained free of charge on application to CCDC, 12 Union Road, Cambridge CB2 1EZ, UK [Fax: (internat.) +44-1223/336-033; E-mail: [deposit@ccdc.cam.ac.uk](mailto:deposit@ccdc.cam.ac.uk)].

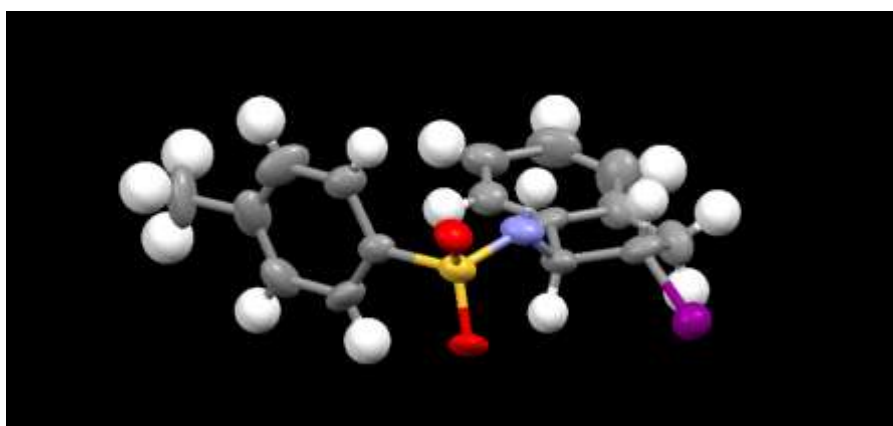

**Figure S2.** Molecular structure of **8** (trans adduct).

**Table S1:** Crystallographic data for **8**

|                                                 | <b>8</b>                                               |
|-------------------------------------------------|--------------------------------------------------------|
| Empirical formula                               | C <sub>16</sub> H <sub>16</sub> O <sub>2</sub> NSI     |
| Formula weight                                  | 413.27                                                 |
| Crystal system                                  | orthorhombic                                           |
| Space group                                     | P2 <sub>1</sub> 2 <sub>1</sub> 2 <sub>1</sub> (No. 19) |
| <i>a</i> [Å]                                    | 5.1624(2)                                              |
| <i>b</i> [Å]                                    | 17.4656(6)                                             |
| <i>c</i> [Å]                                    | 18.1124(6)                                             |
| <i>V</i> [Å <sup>3</sup> ]                      | 7762.7(10)                                             |
| <i>Z</i>                                        | 4                                                      |
| <i>D</i> <sub>calcd</sub> [g cm <sup>-3</sup> ] | 1.681                                                  |
| $\mu$ (Cu K $\alpha$ ) [cm <sup>-1</sup> ]      | 166.275                                                |
| <i>T</i> [°C]                                   | -100.0                                                 |
| $\lambda$ (Cu K $\alpha$ ) [Å]                  | 1.54187                                                |
| <i>R</i> 1 <sup>a</sup>                         | 0.0759                                                 |
| <i>wR</i> 2 <sup>b</sup>                        | 0.2140                                                 |

$$^a R1 = \Sigma ||F_o| - |F_c|| / \Sigma |F_o|. \quad ^b wR2 = [\Sigma w(F_o^2 - F_c^2)^2 / \Sigma w(F_o^2)^2]^{1/2}.$$

## References

- S1 (a) T. Ando, D. Kano, S. Minakata, I. Ryu and M. Komatsu, *Tetrahedron*, 1998, **54**, 13485; (b) J. U. Jeong, B. Tao, I. Sagasser, H. Henniges and K. B. Sharpless, *J. Am. Chem. Soc.*, 1998, **120**, 6844; (c) D. Sureshkumar, T. Gunasundari, V. Ganesh and S. Chandrasekaran, *J. Org. Chem.*, 2007, **72**, 2106; (d) S. Mangelinckx, A. Žukauskaite, V. Buinauskaite, A. Šačkus and N. D. Kimpe, *Tetrahedron. Lett.*, 2008, **49**, 6896.
- S2 J. S. Yadav, B. V. S. Reddy, M. S. Reddy and A. R. Prasad, *Tetrahedron Lett.*, 2002, **43**, 9703.
- S3 S. Minakata, T. Hotta, Y. Oderaotoshi and M. Komatsu, *J. Org. Chem.*, 2006, **71**, 7471.
- S4 S. Minakata, Y. Okada, Y. Oderaotoshi and M. Komatsu, *Org. Lett.*, 2005, **7**, 3509.
- S5 F. Gao, M. Deng and C. Qian, *Tetrahedron*, 2005, **61**, 12238.

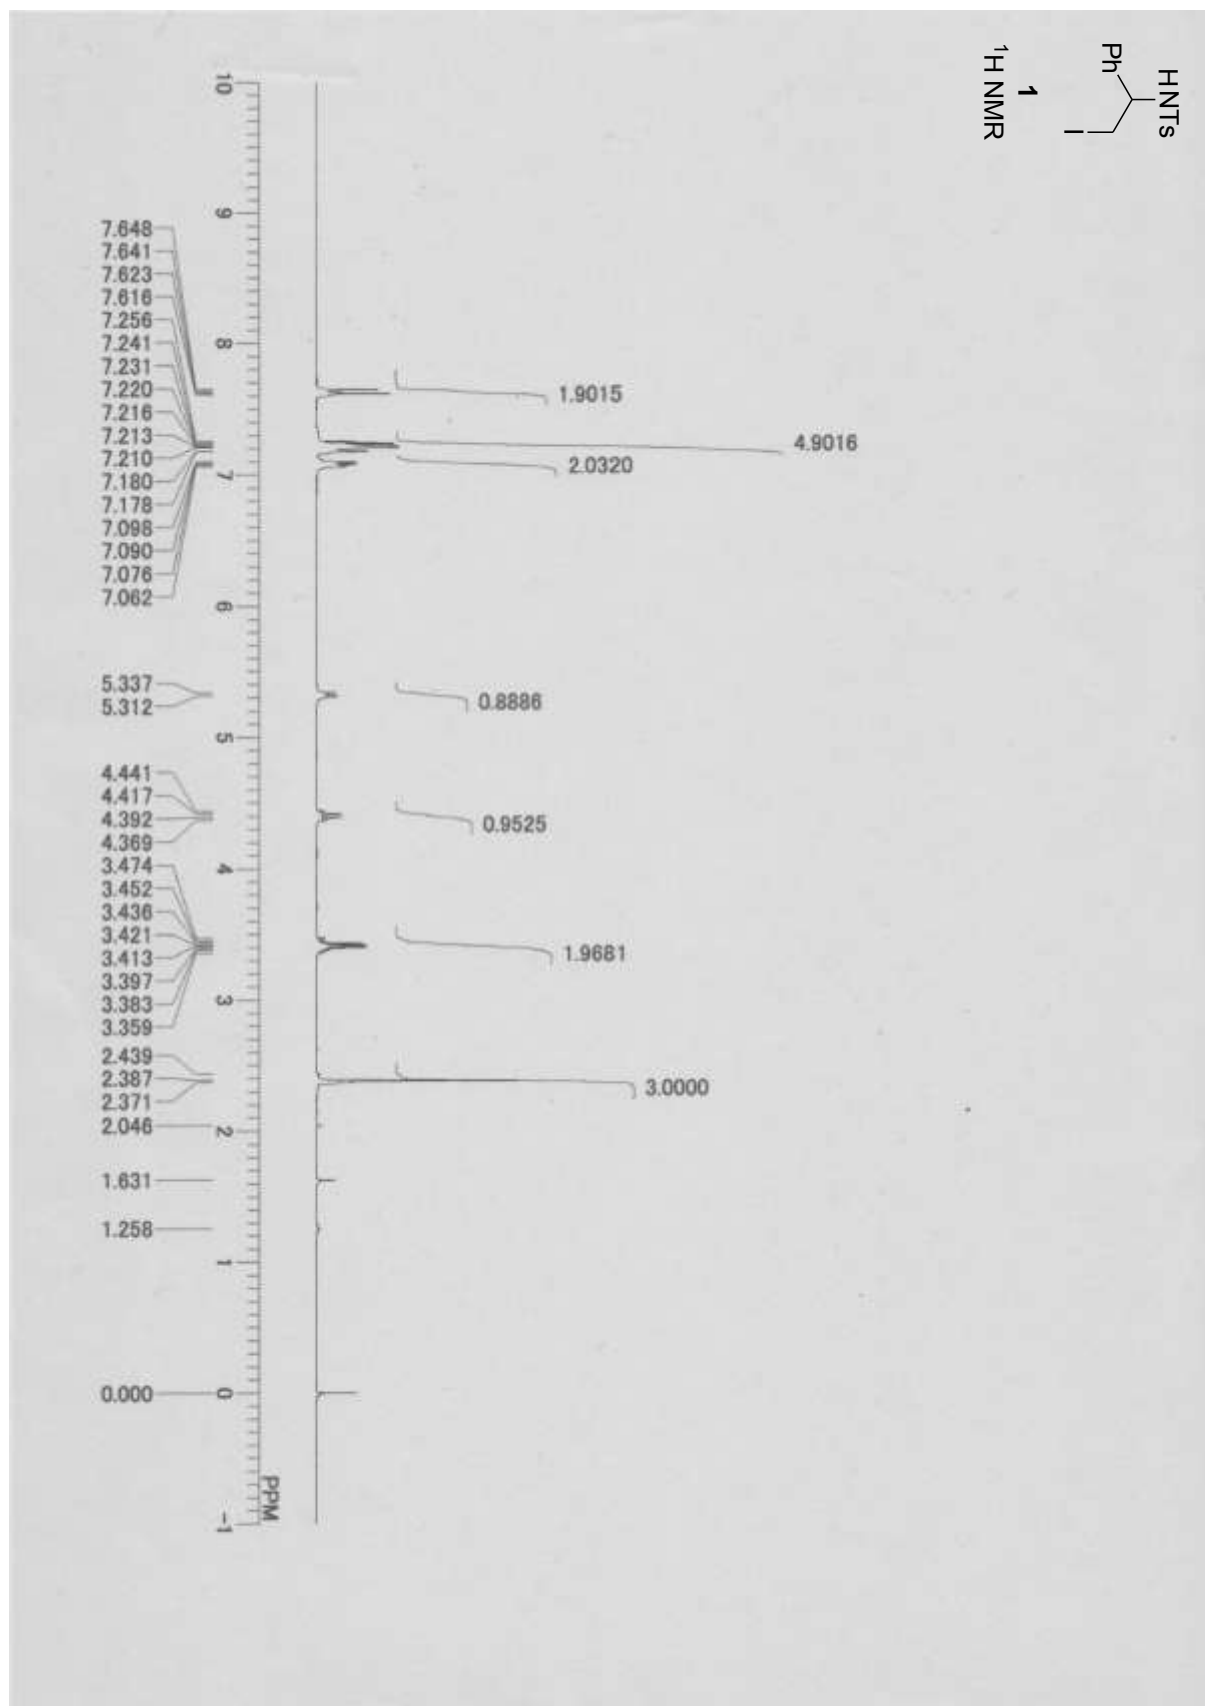

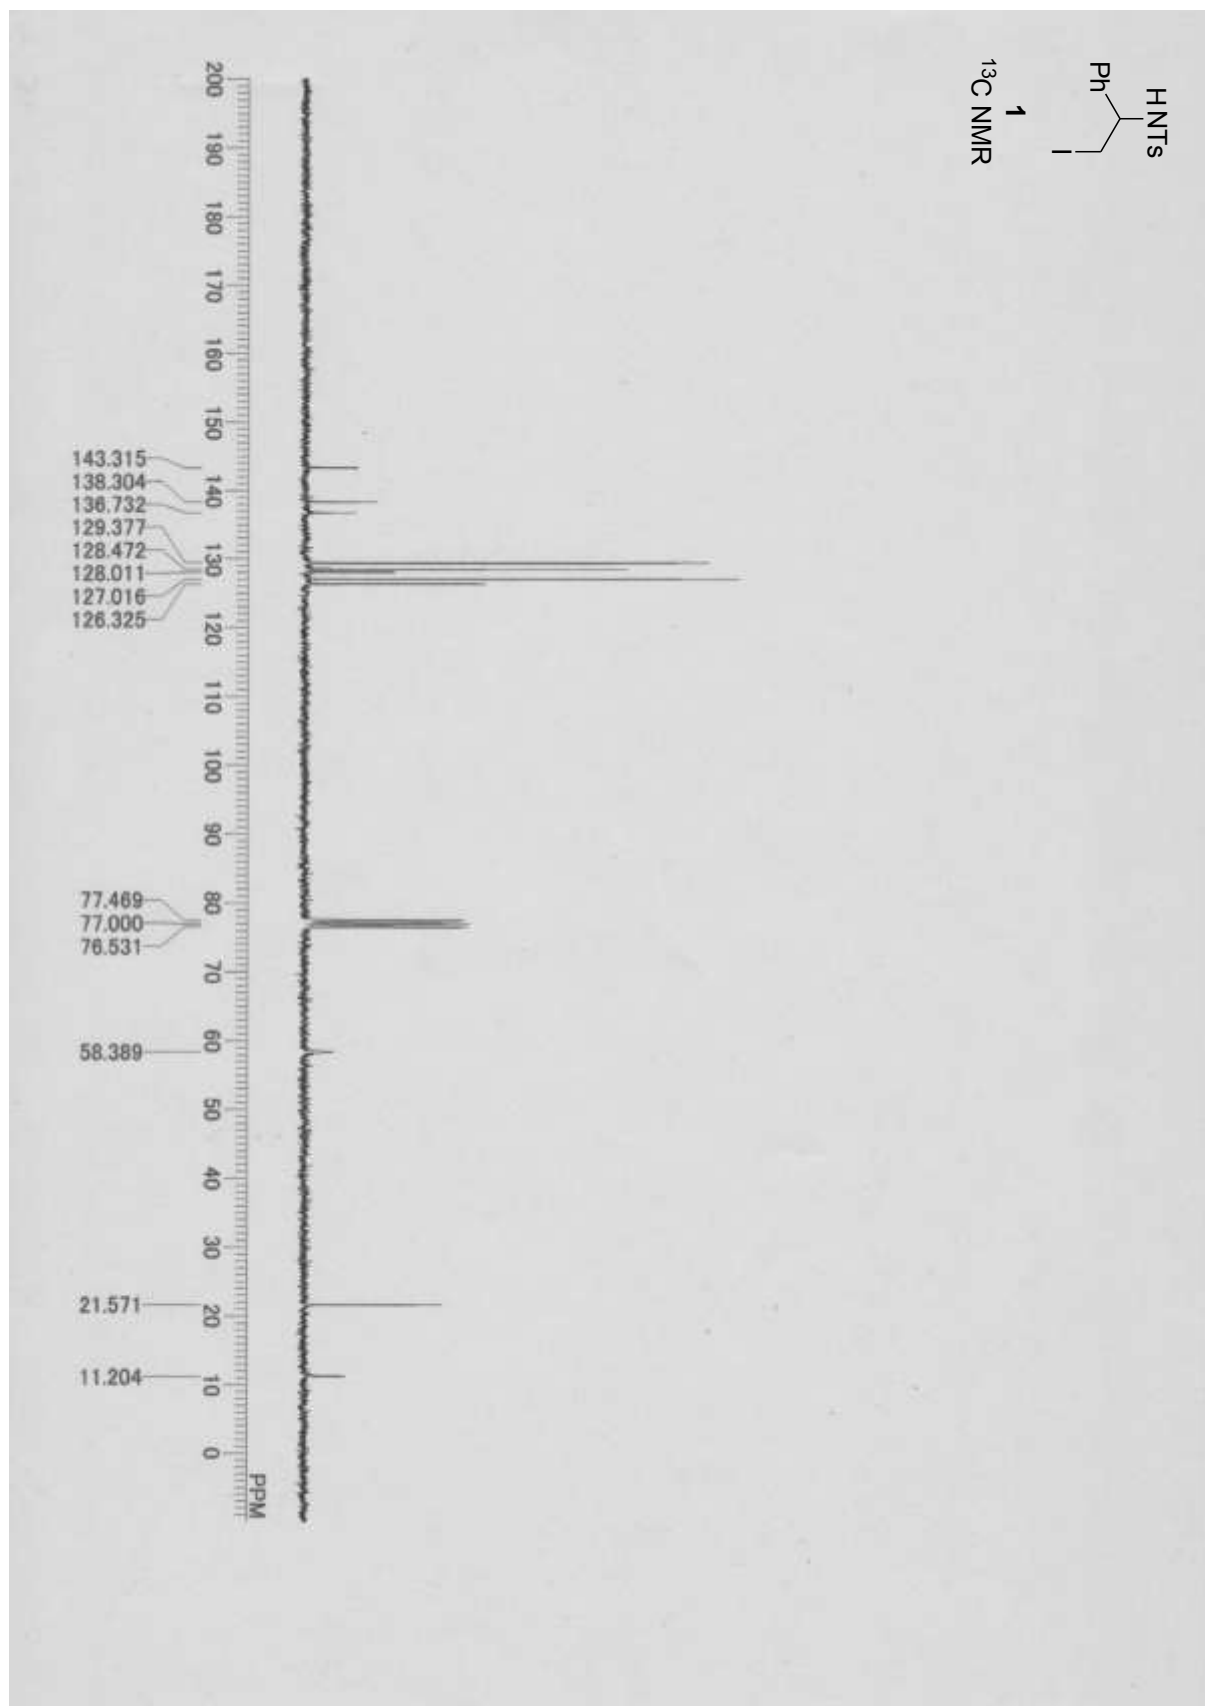



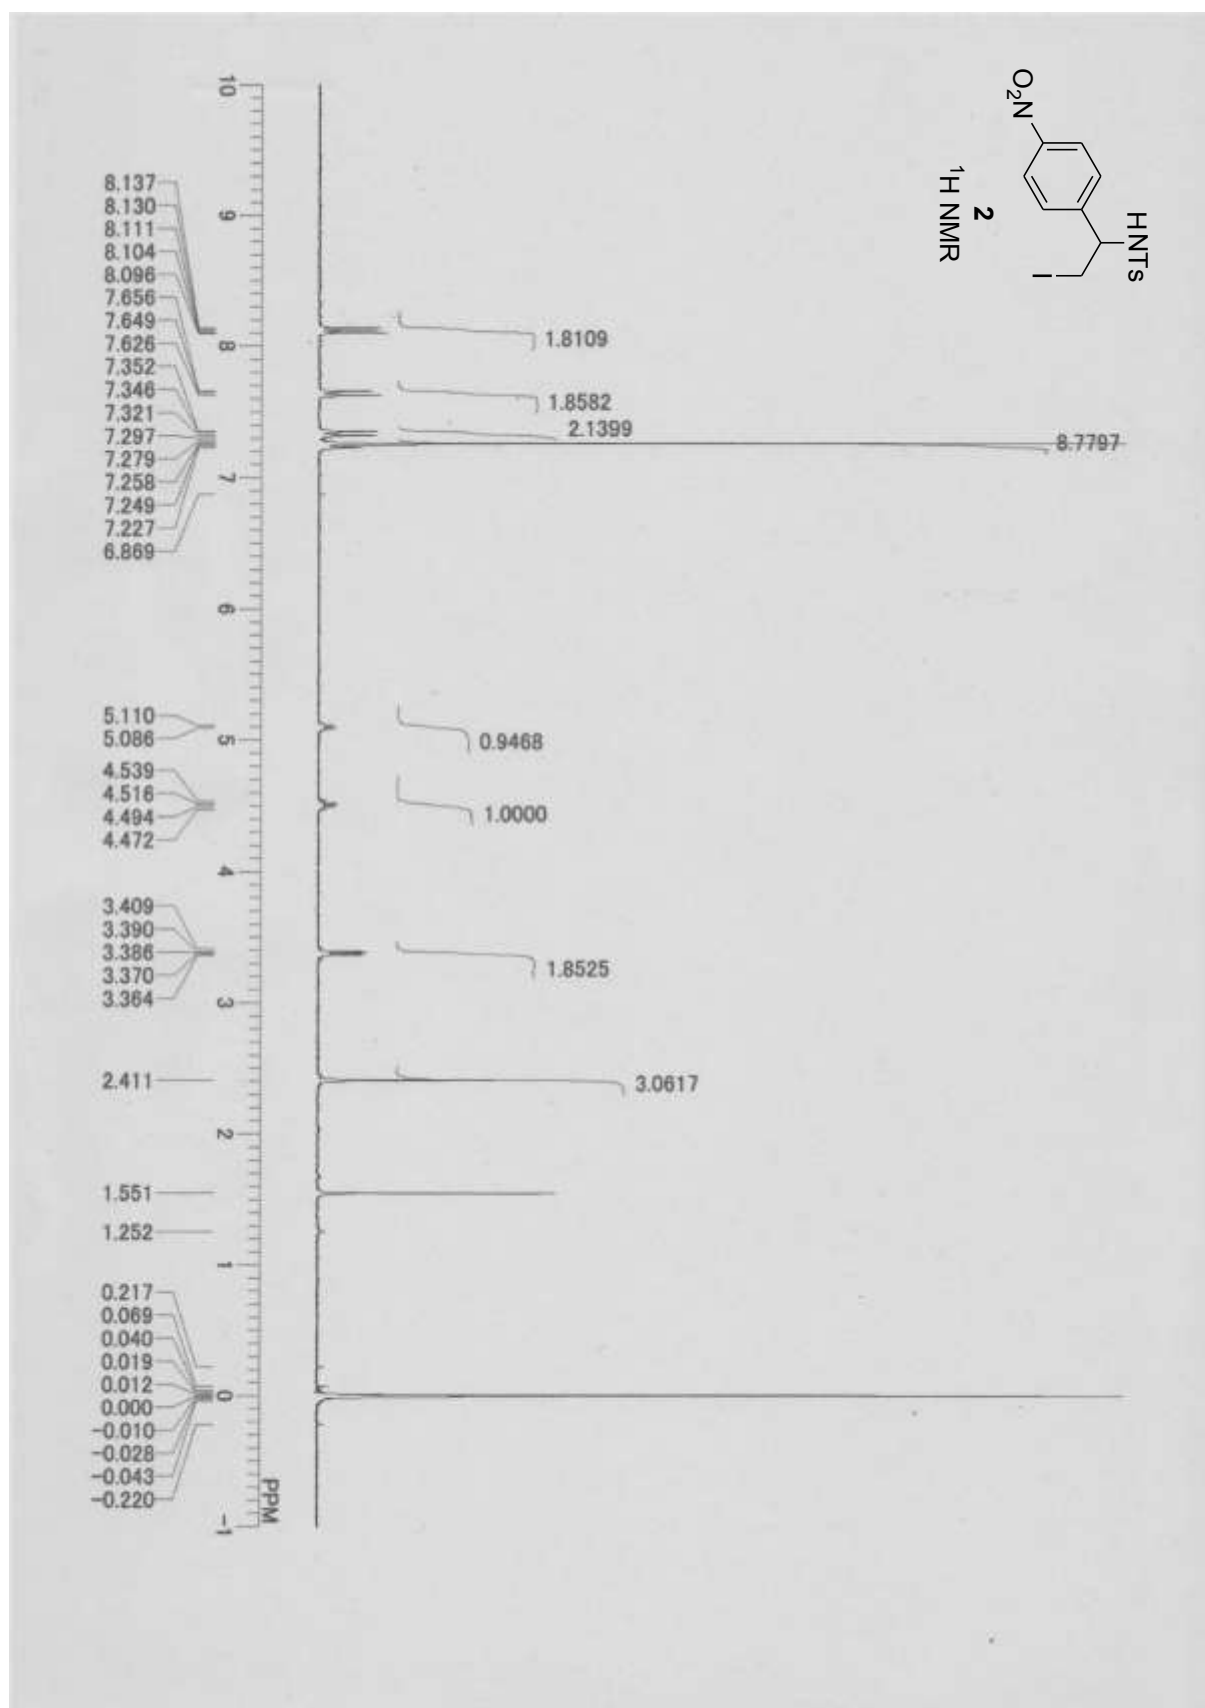

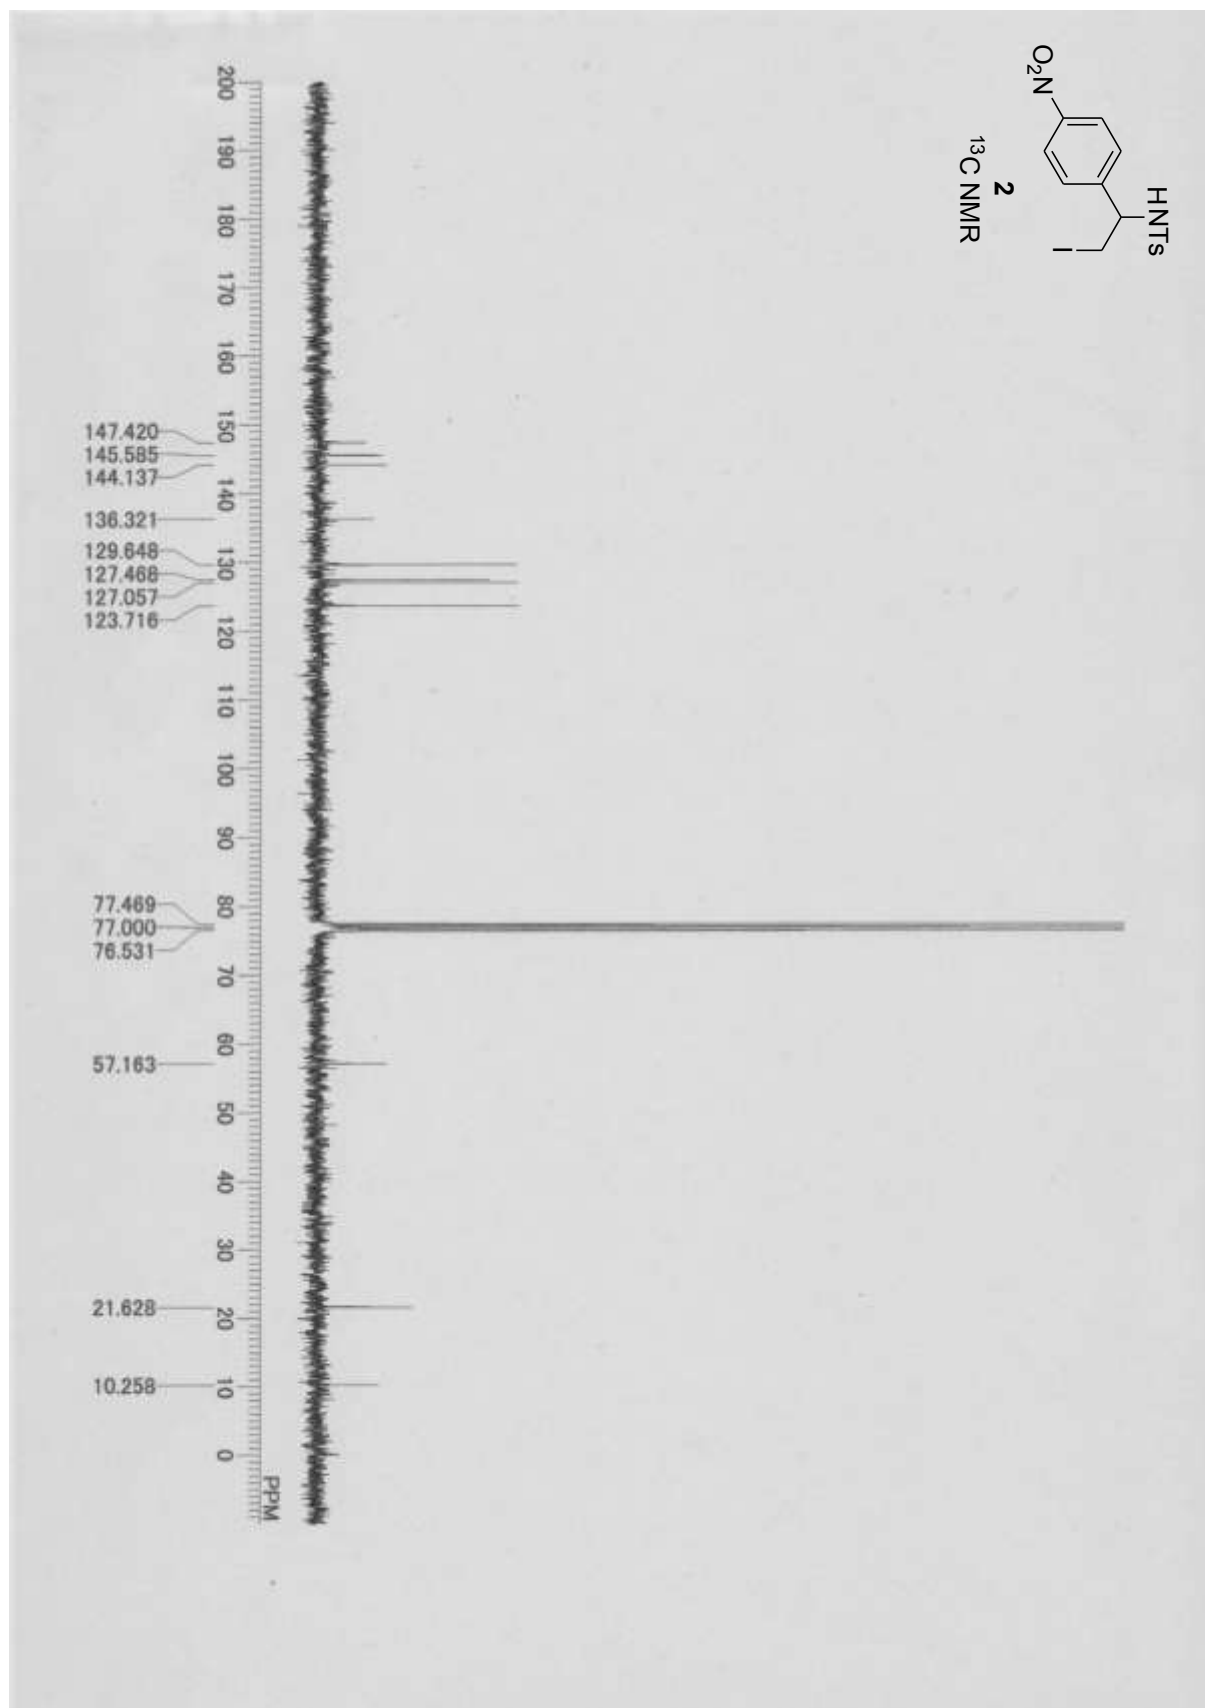

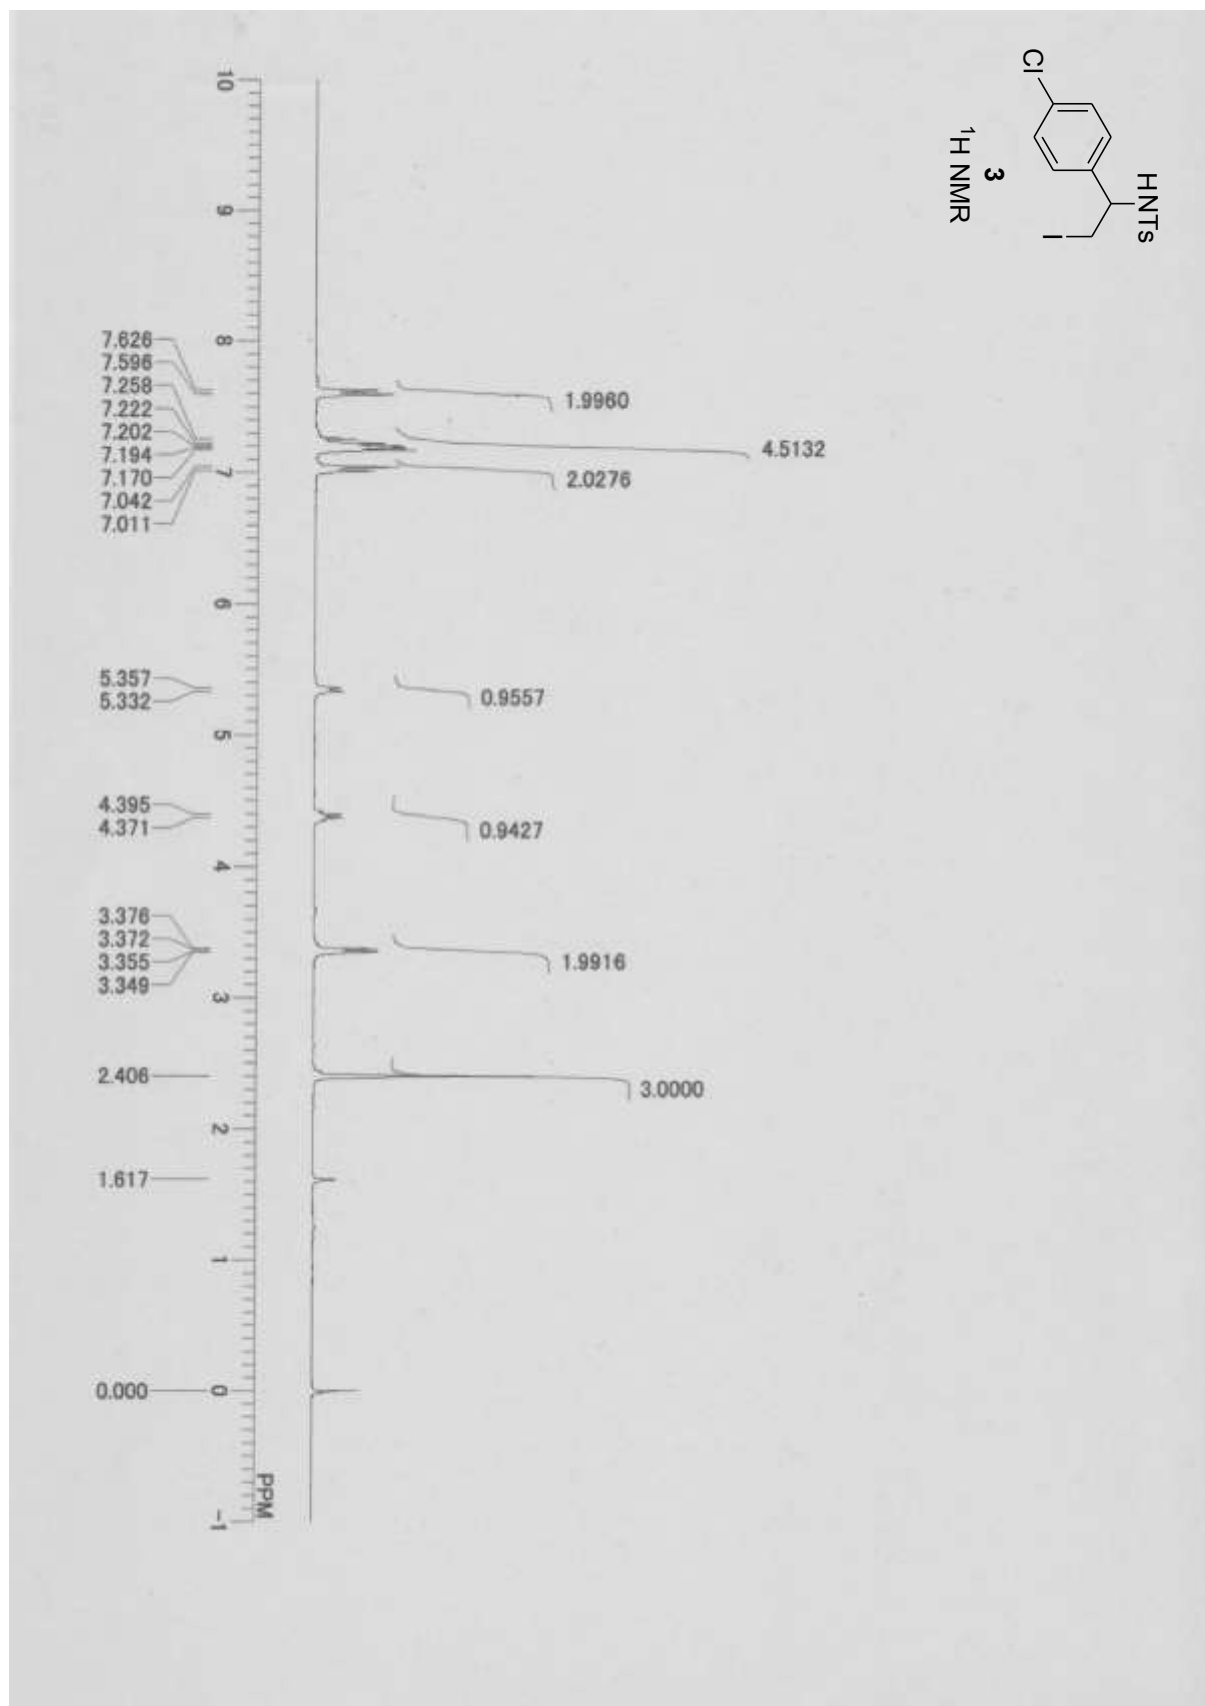

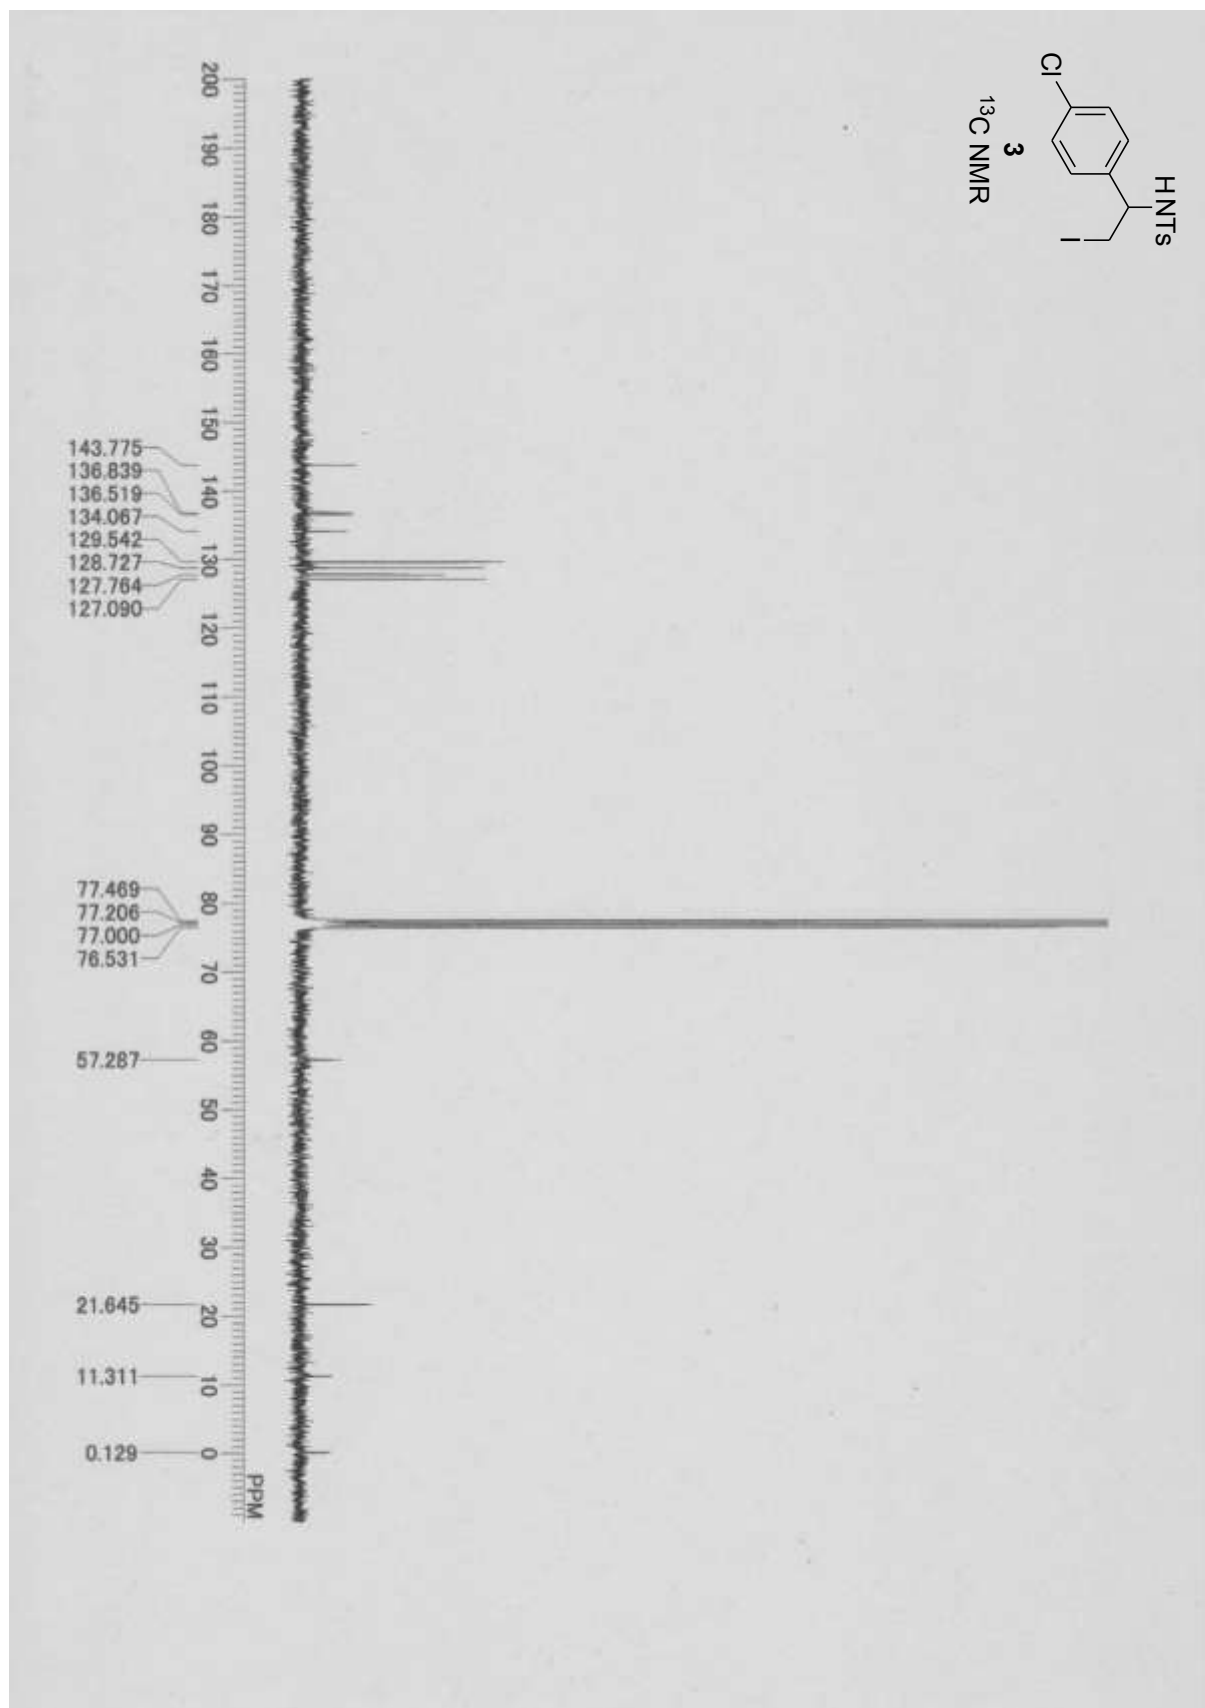

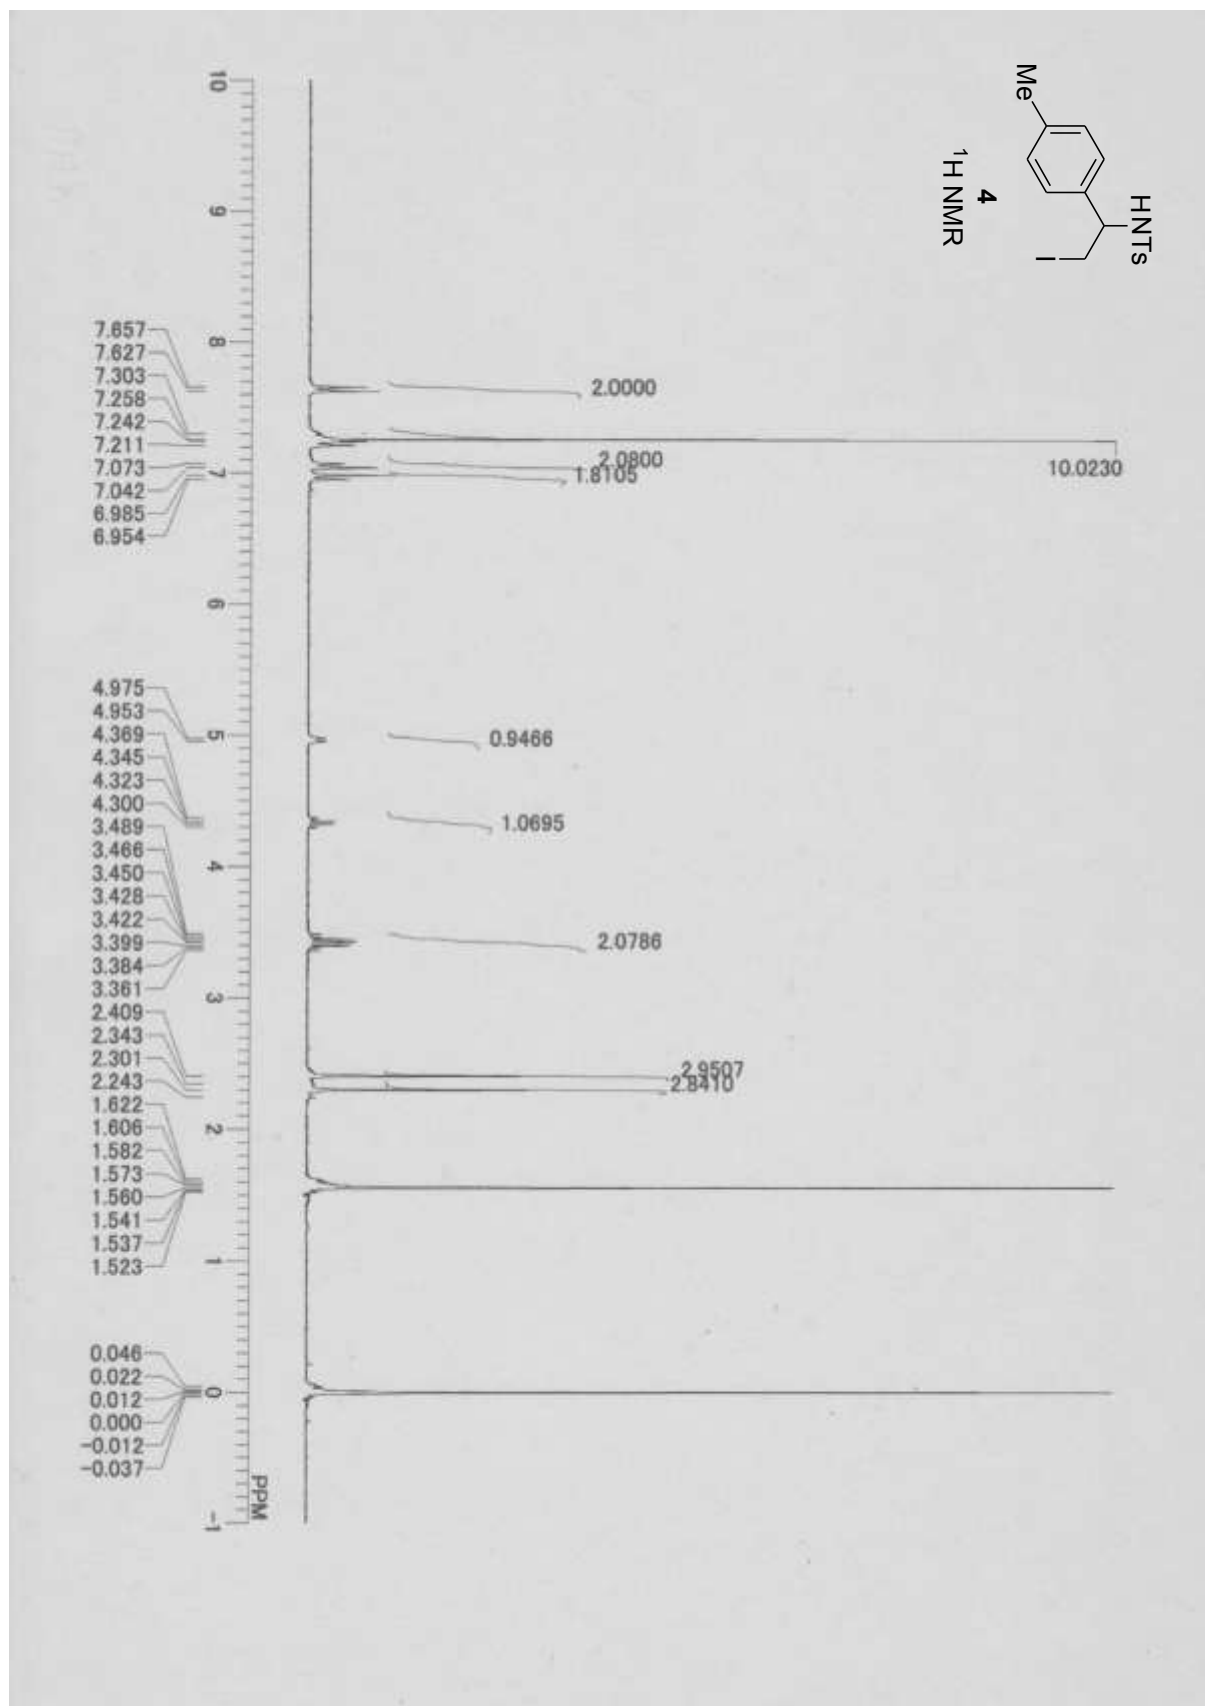

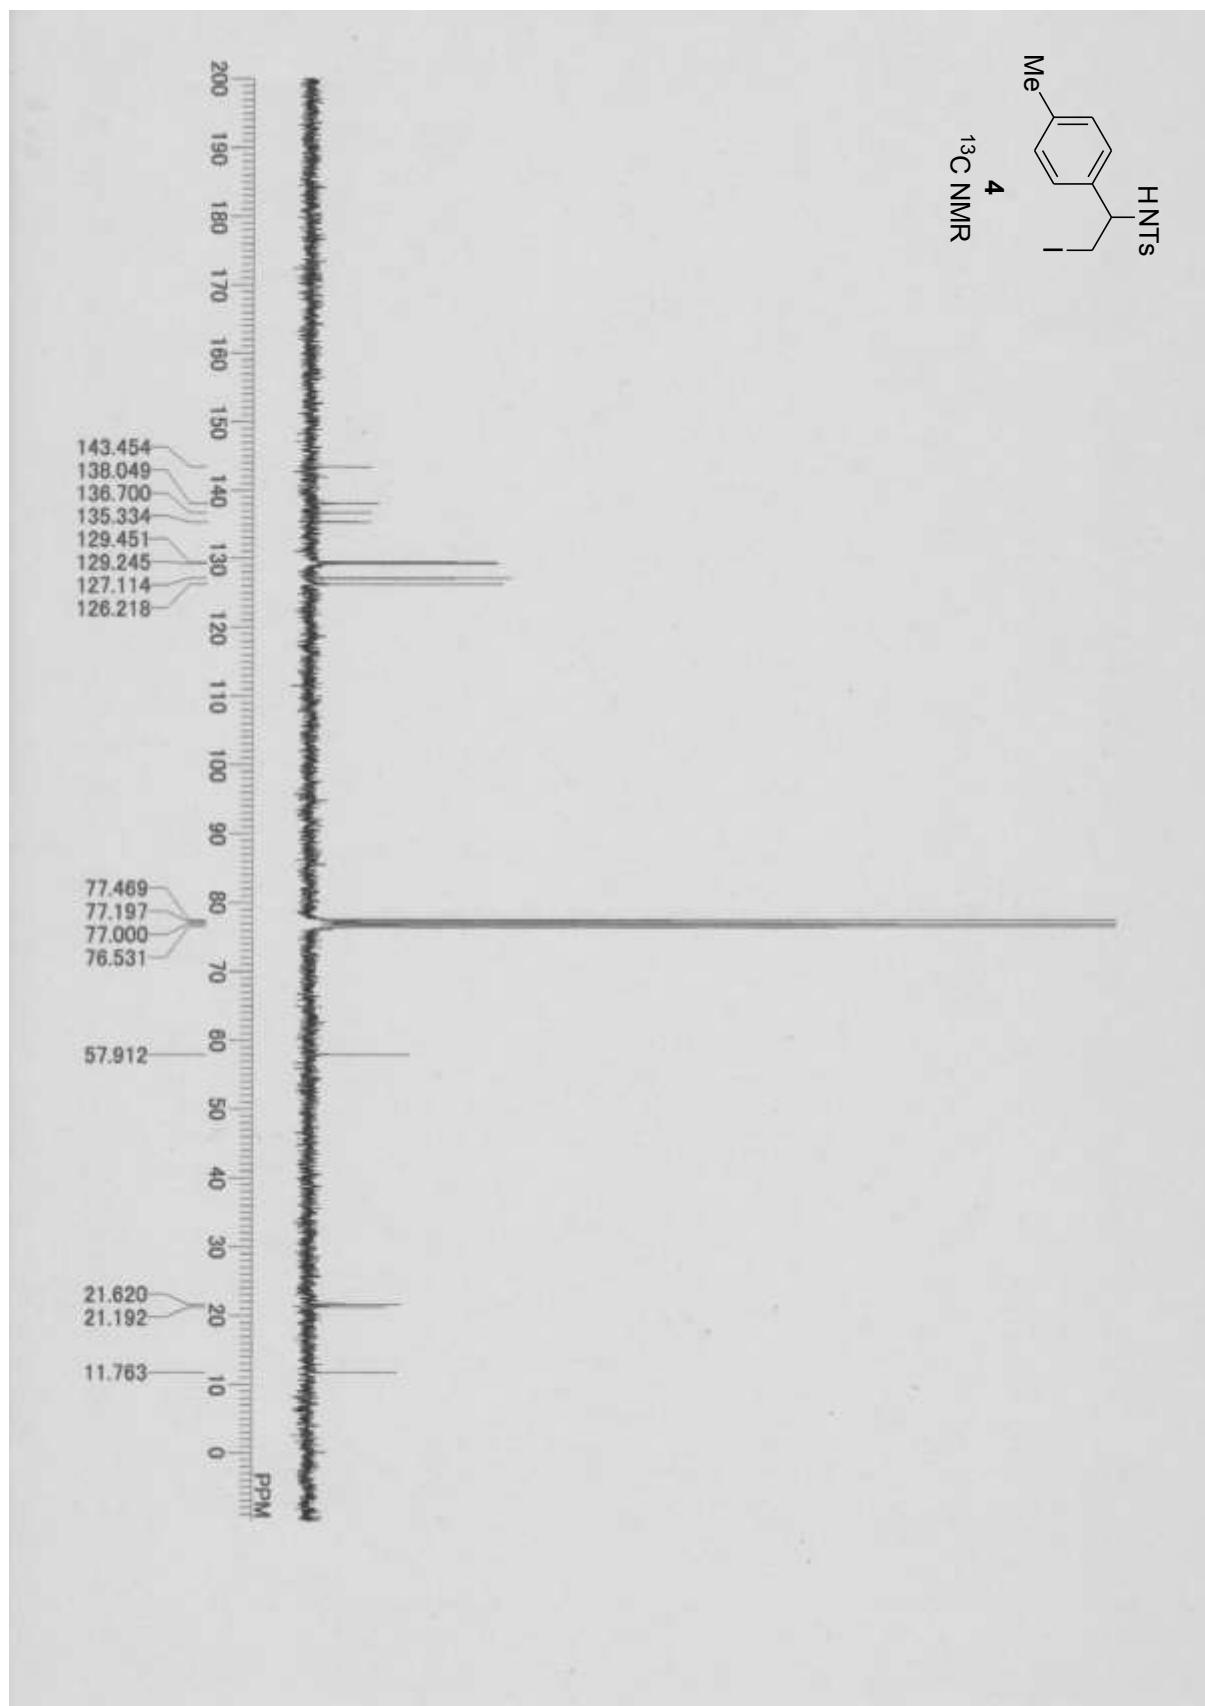

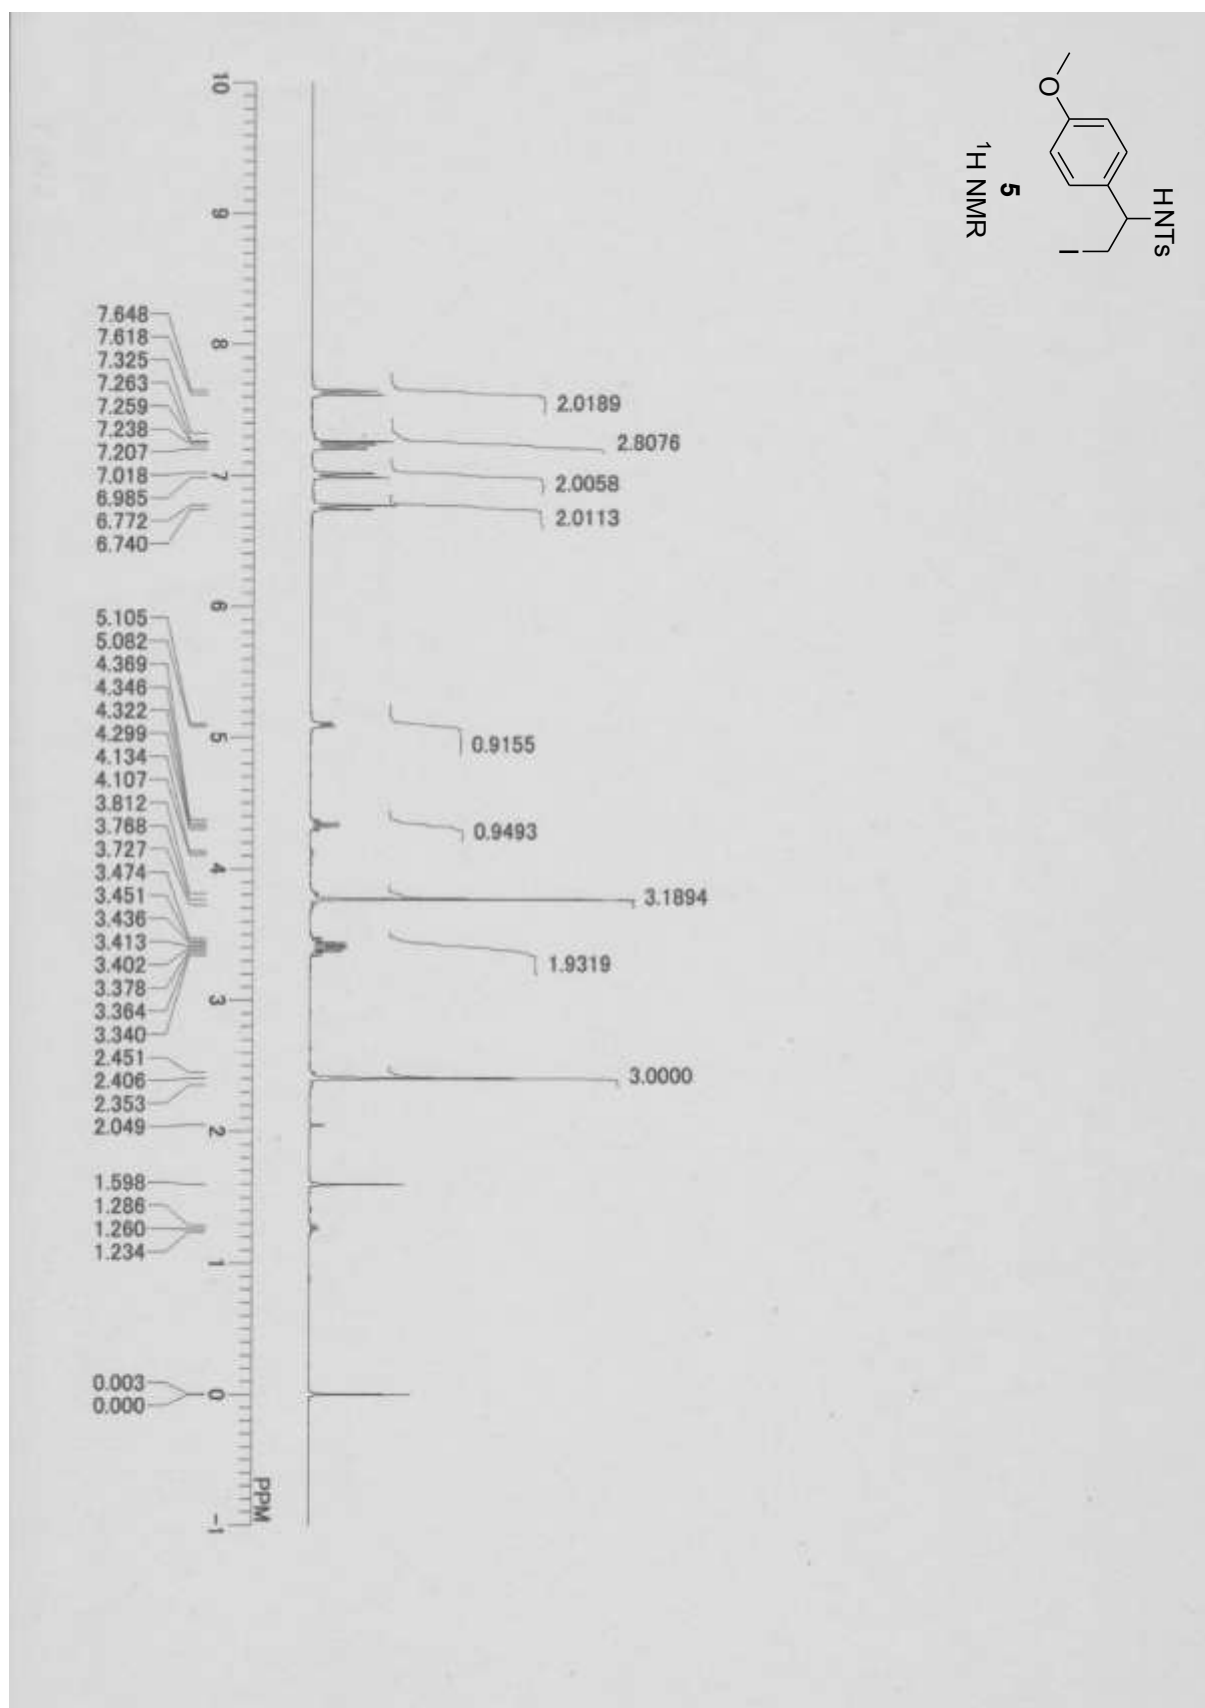

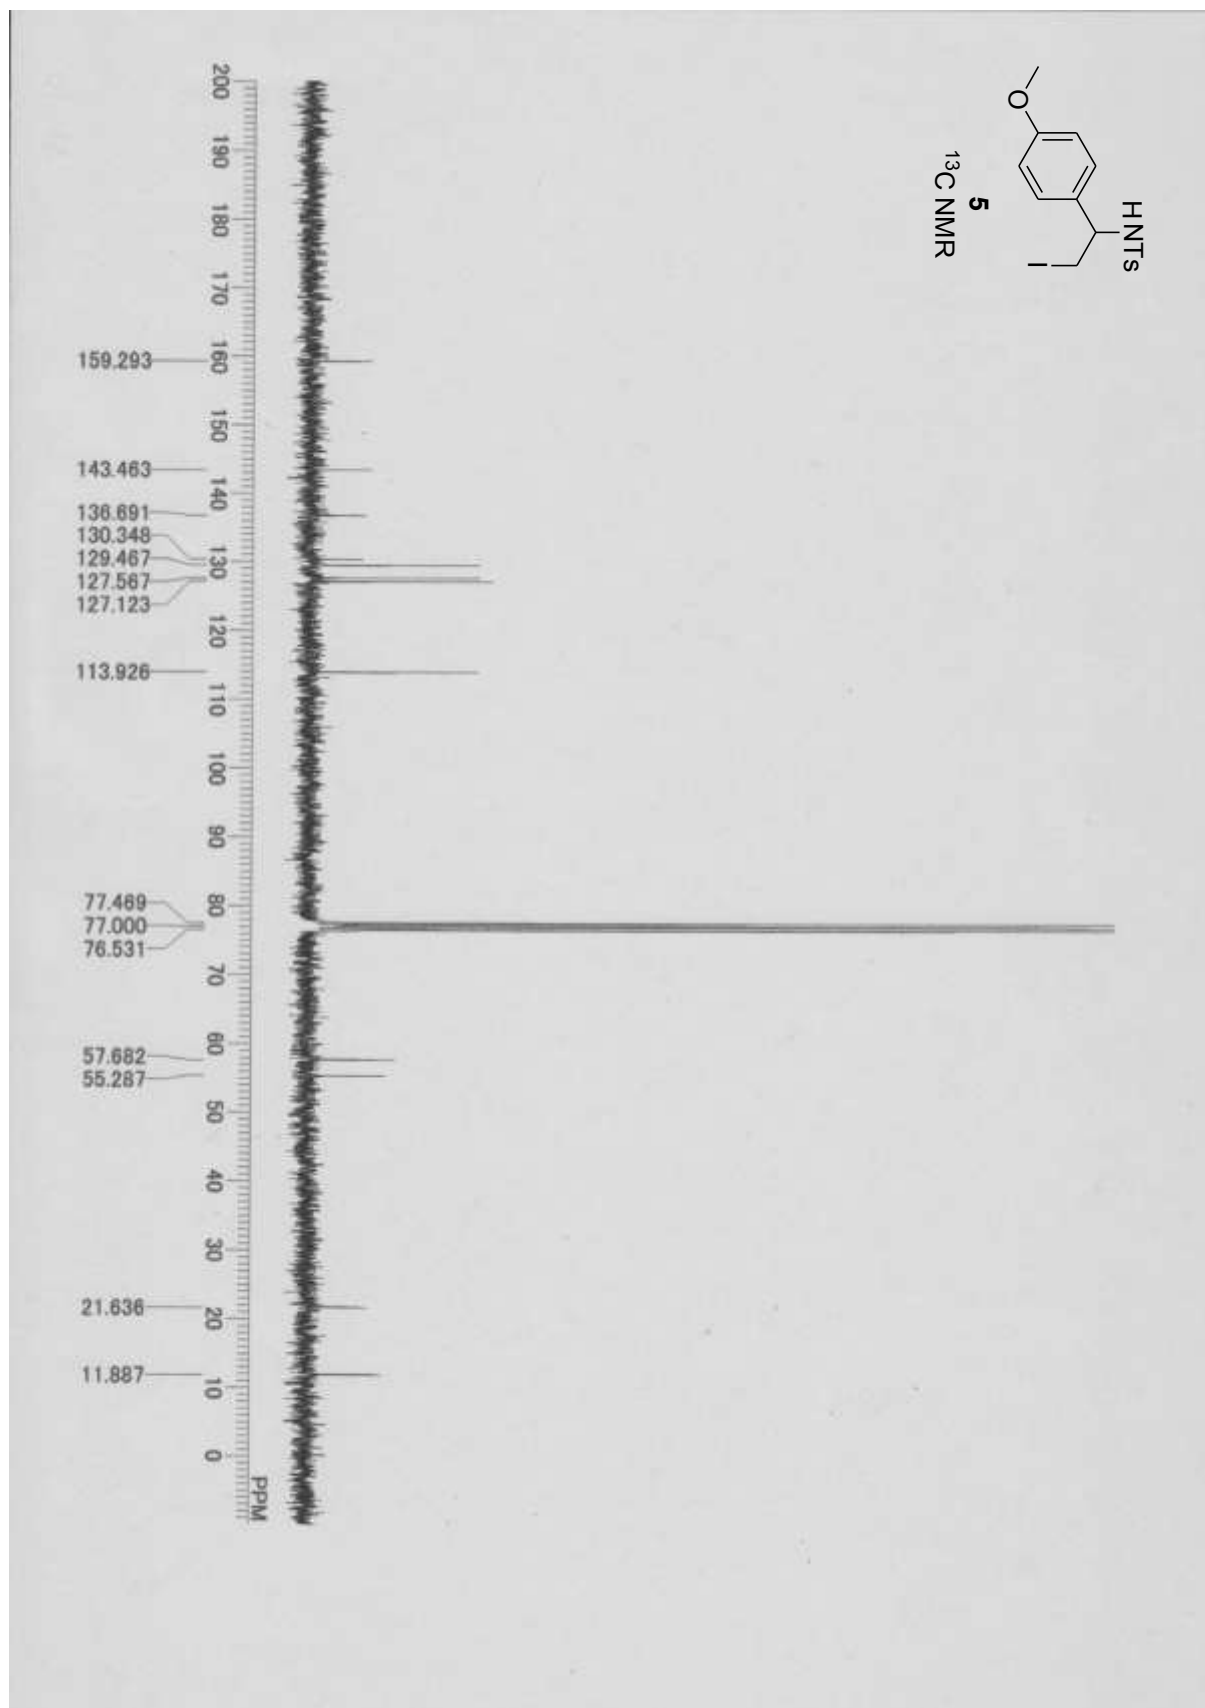



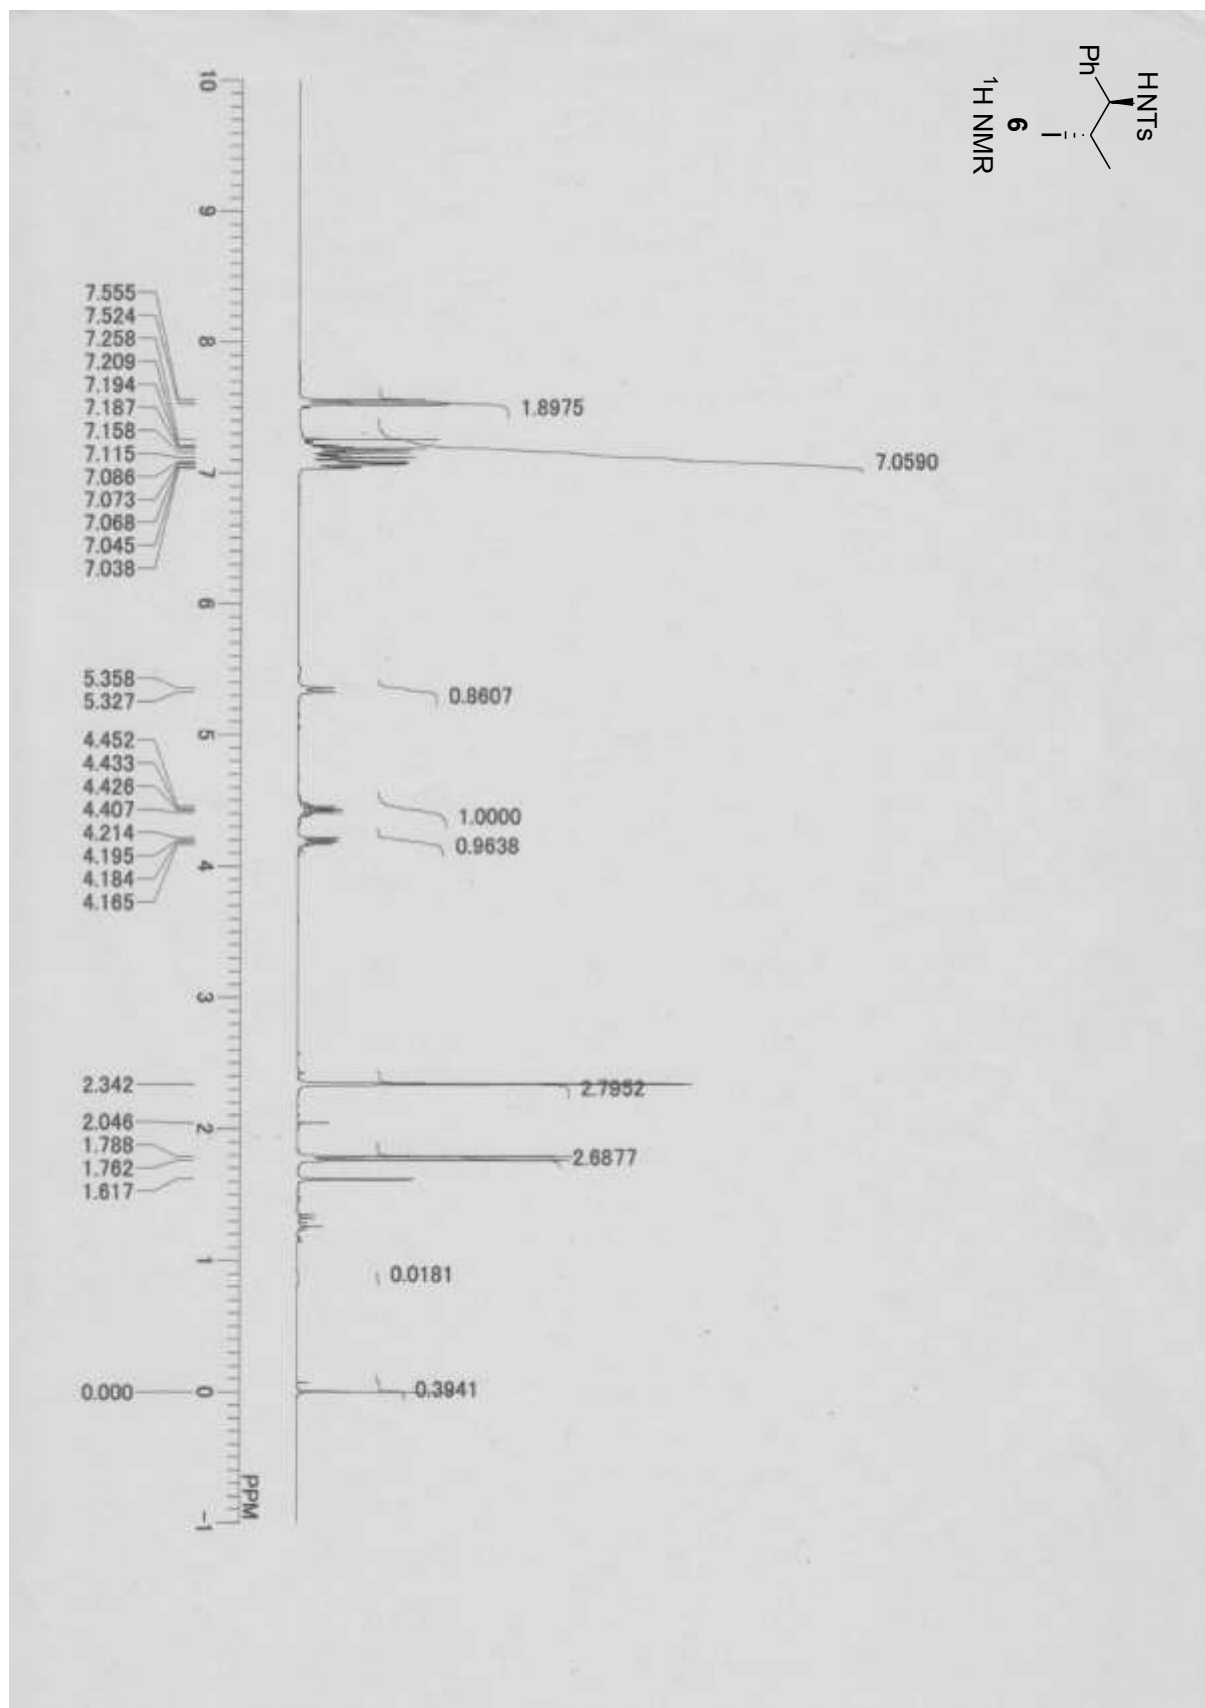

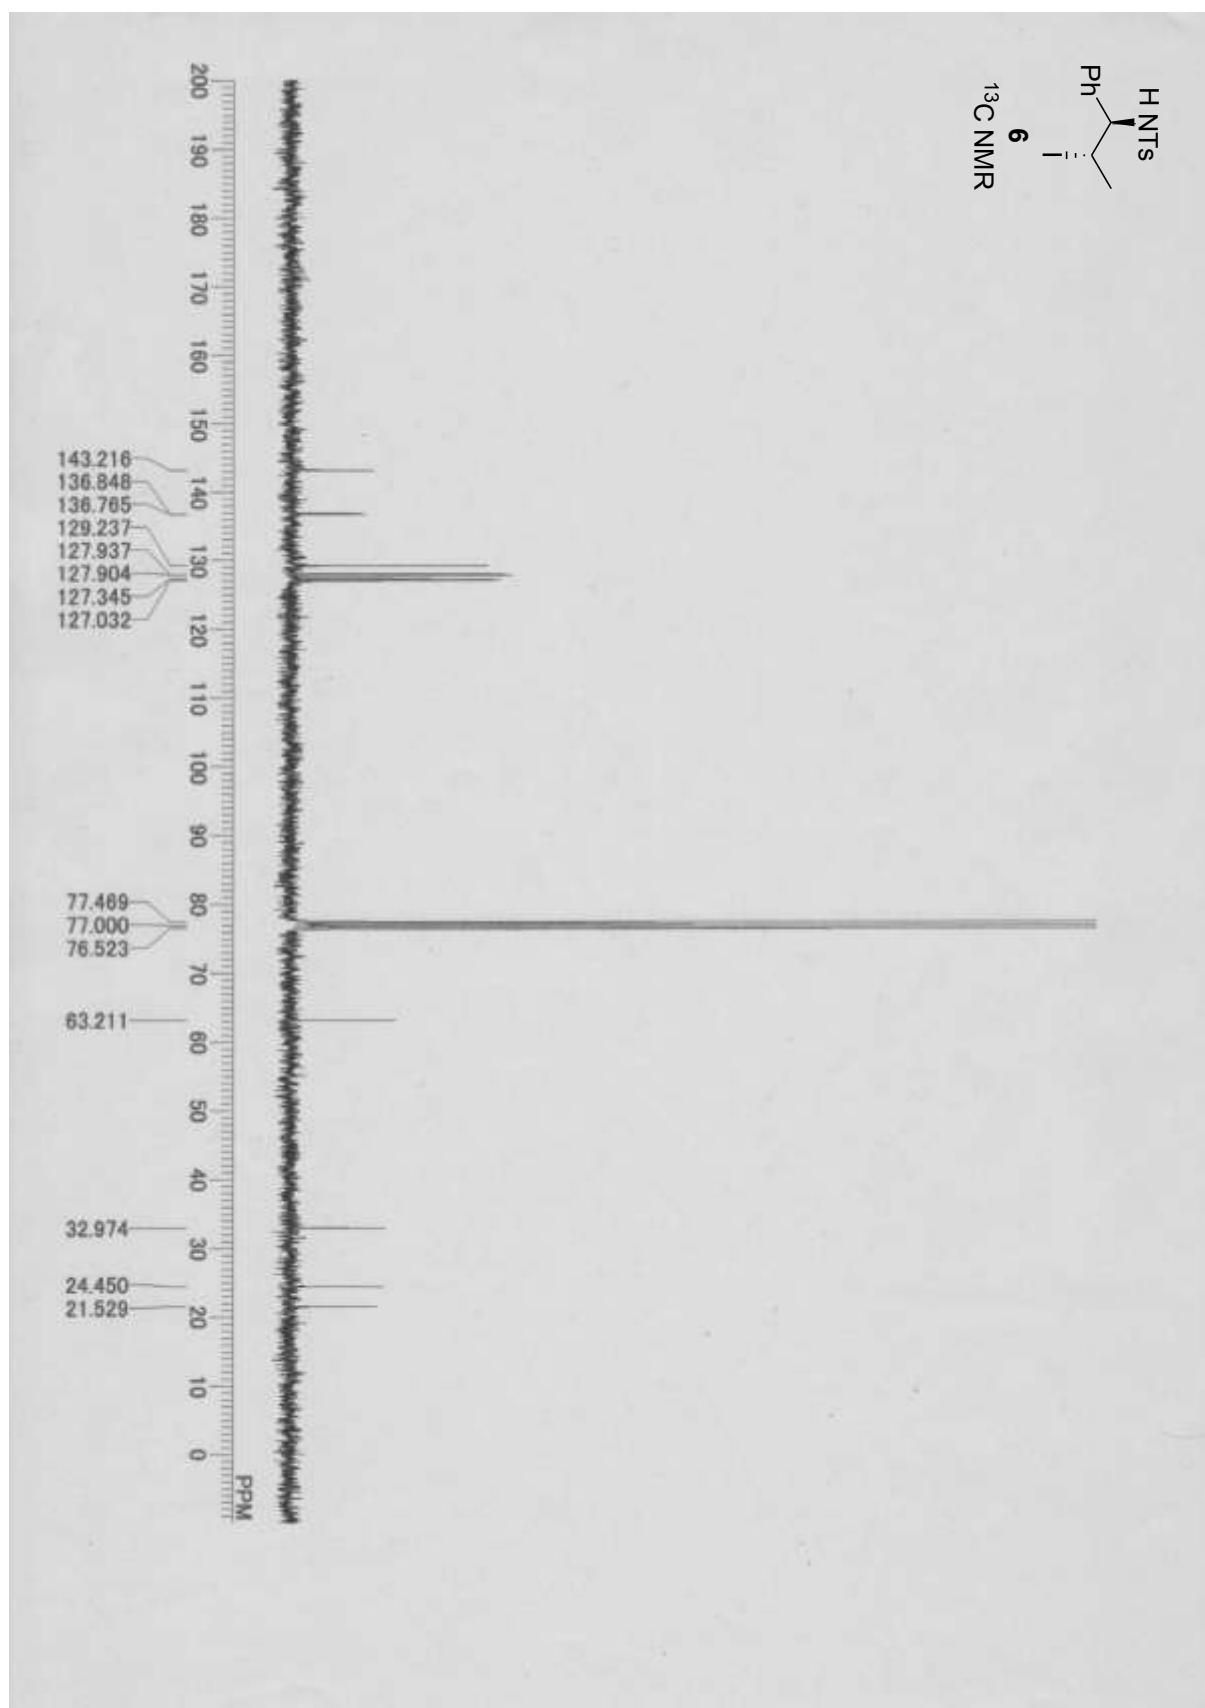

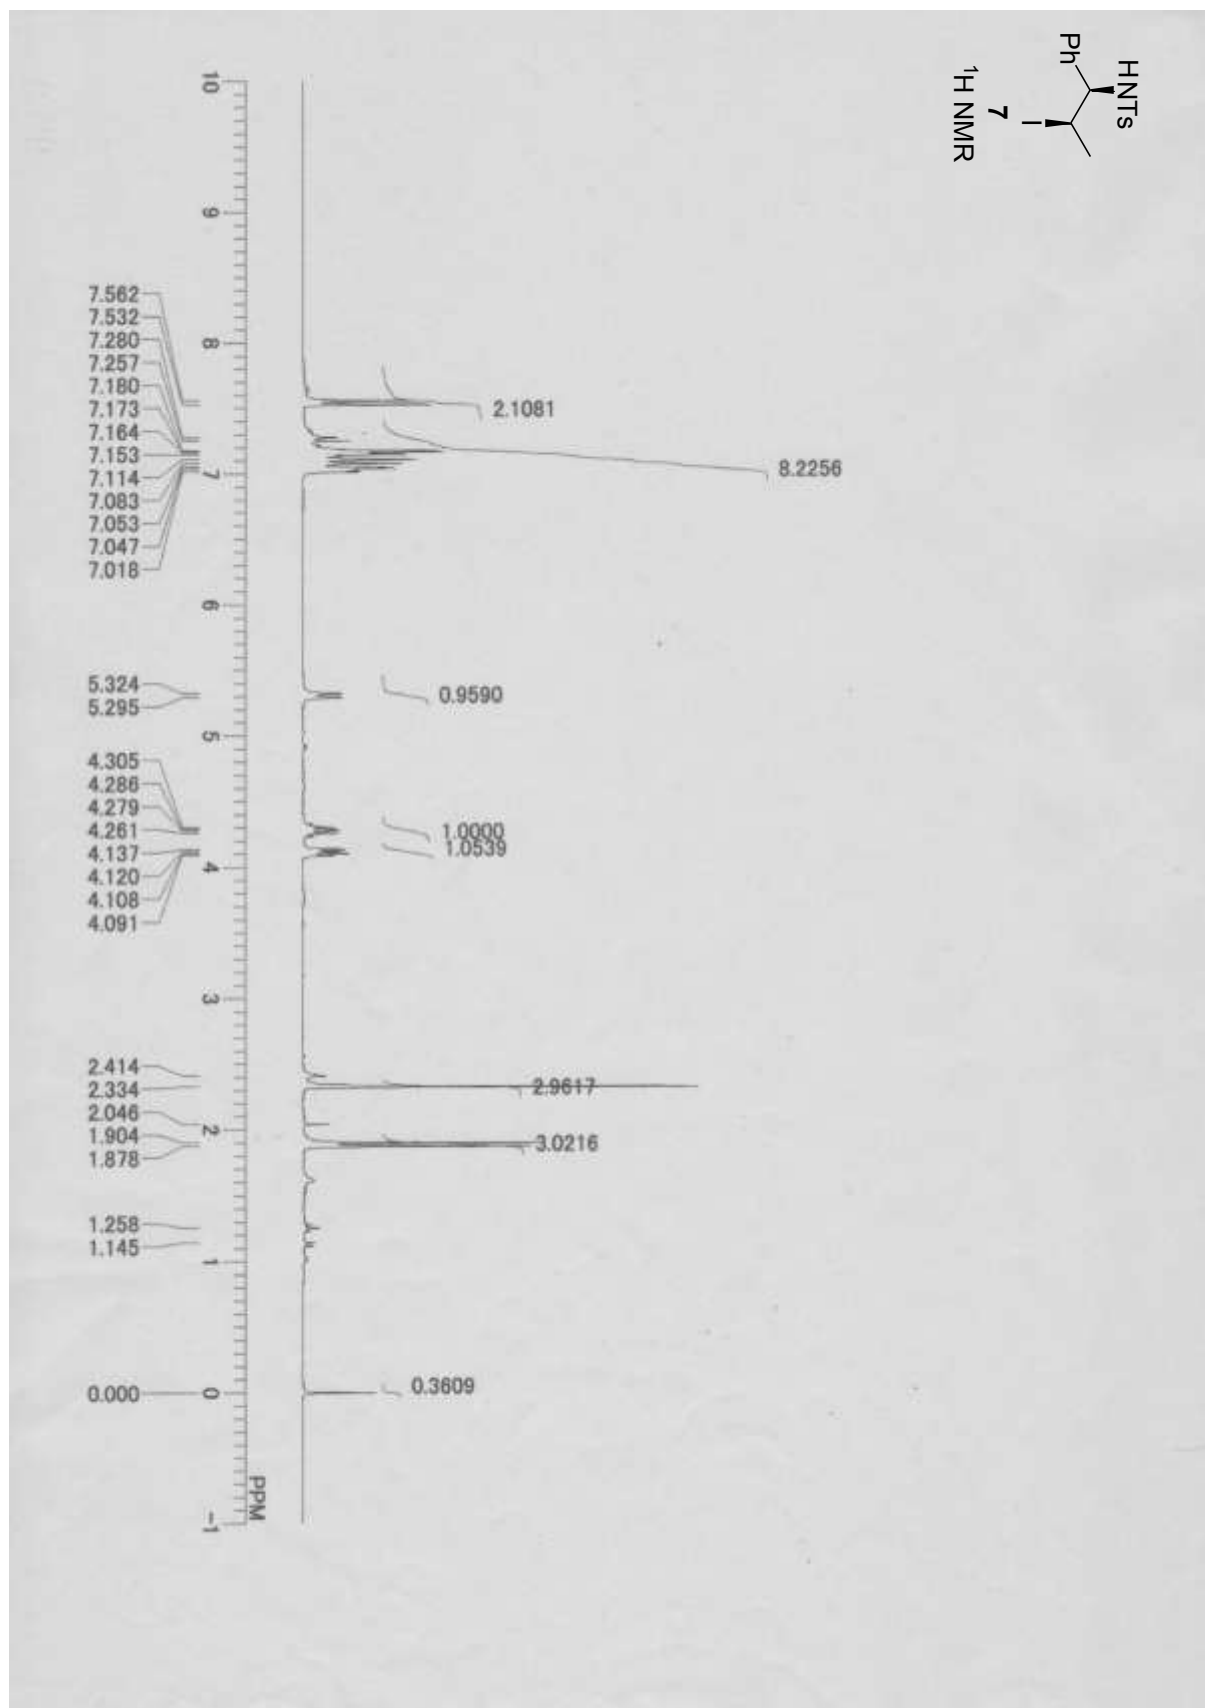

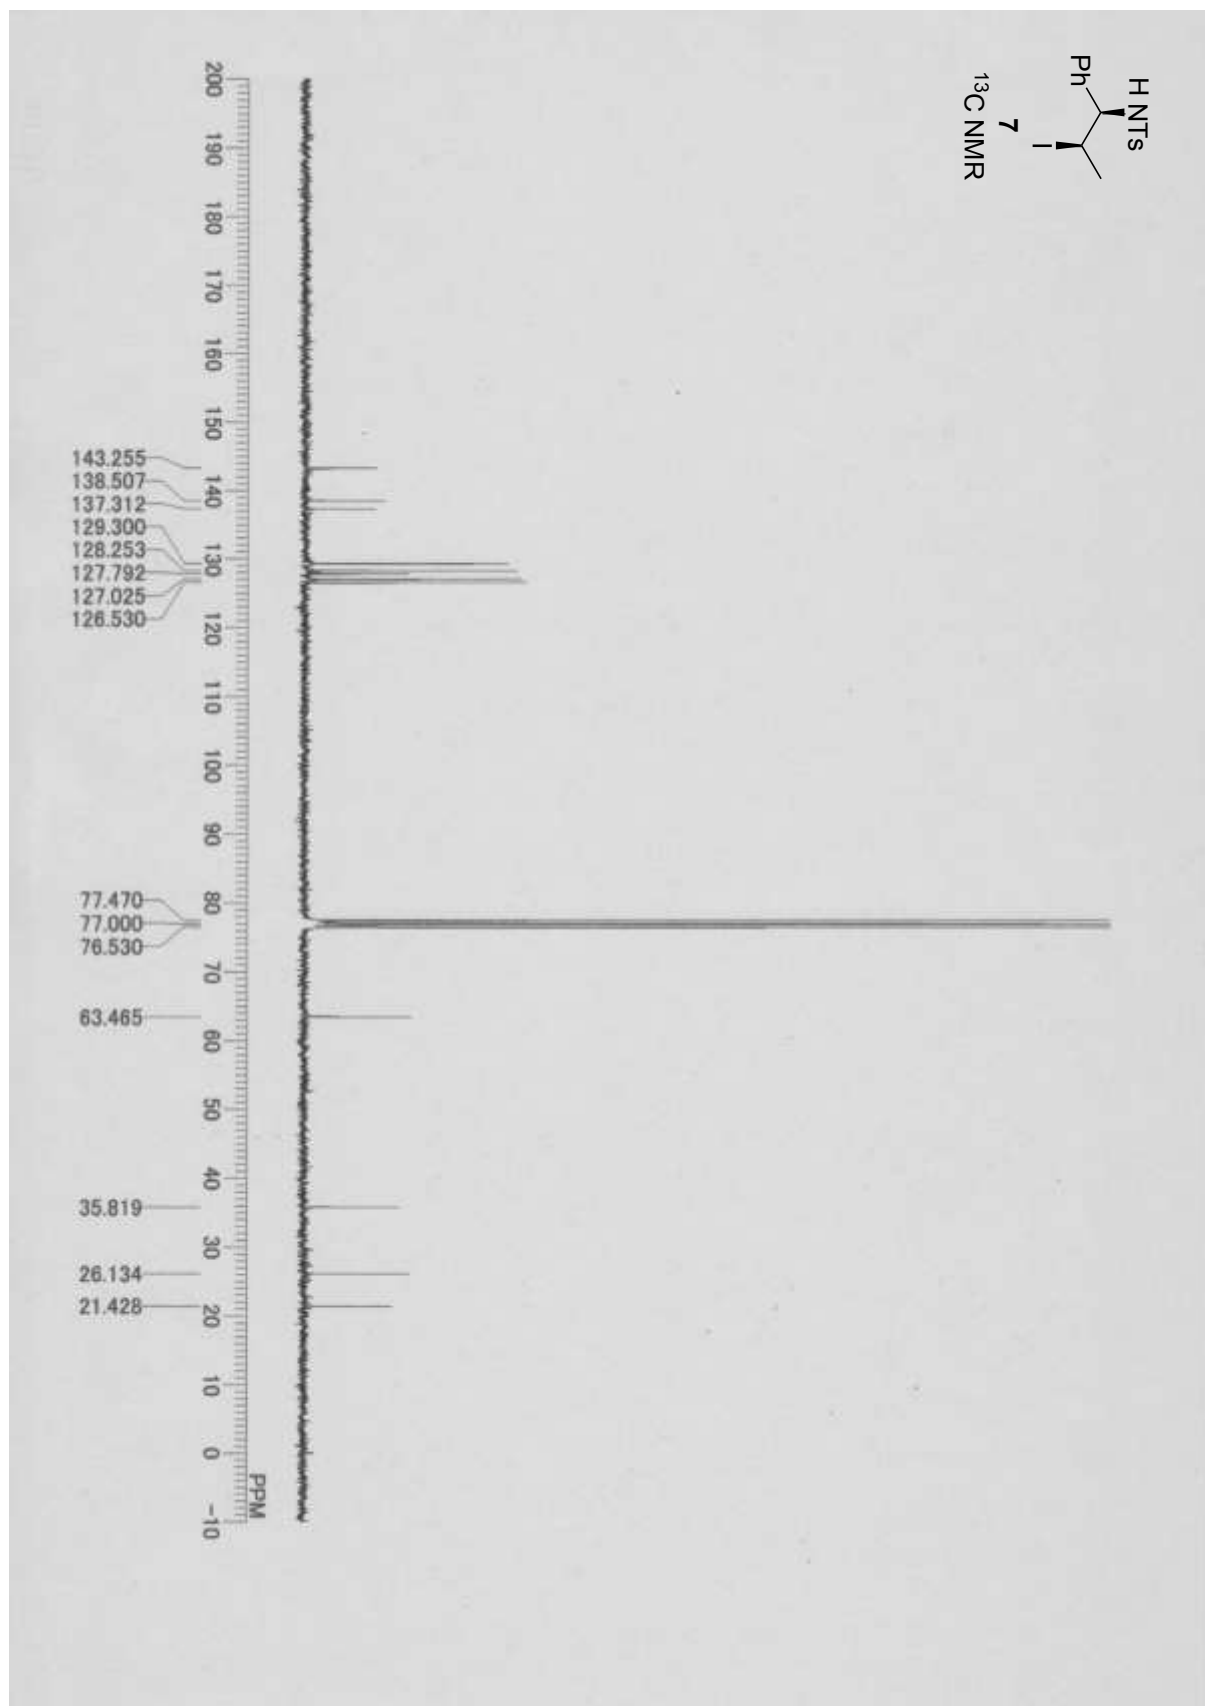

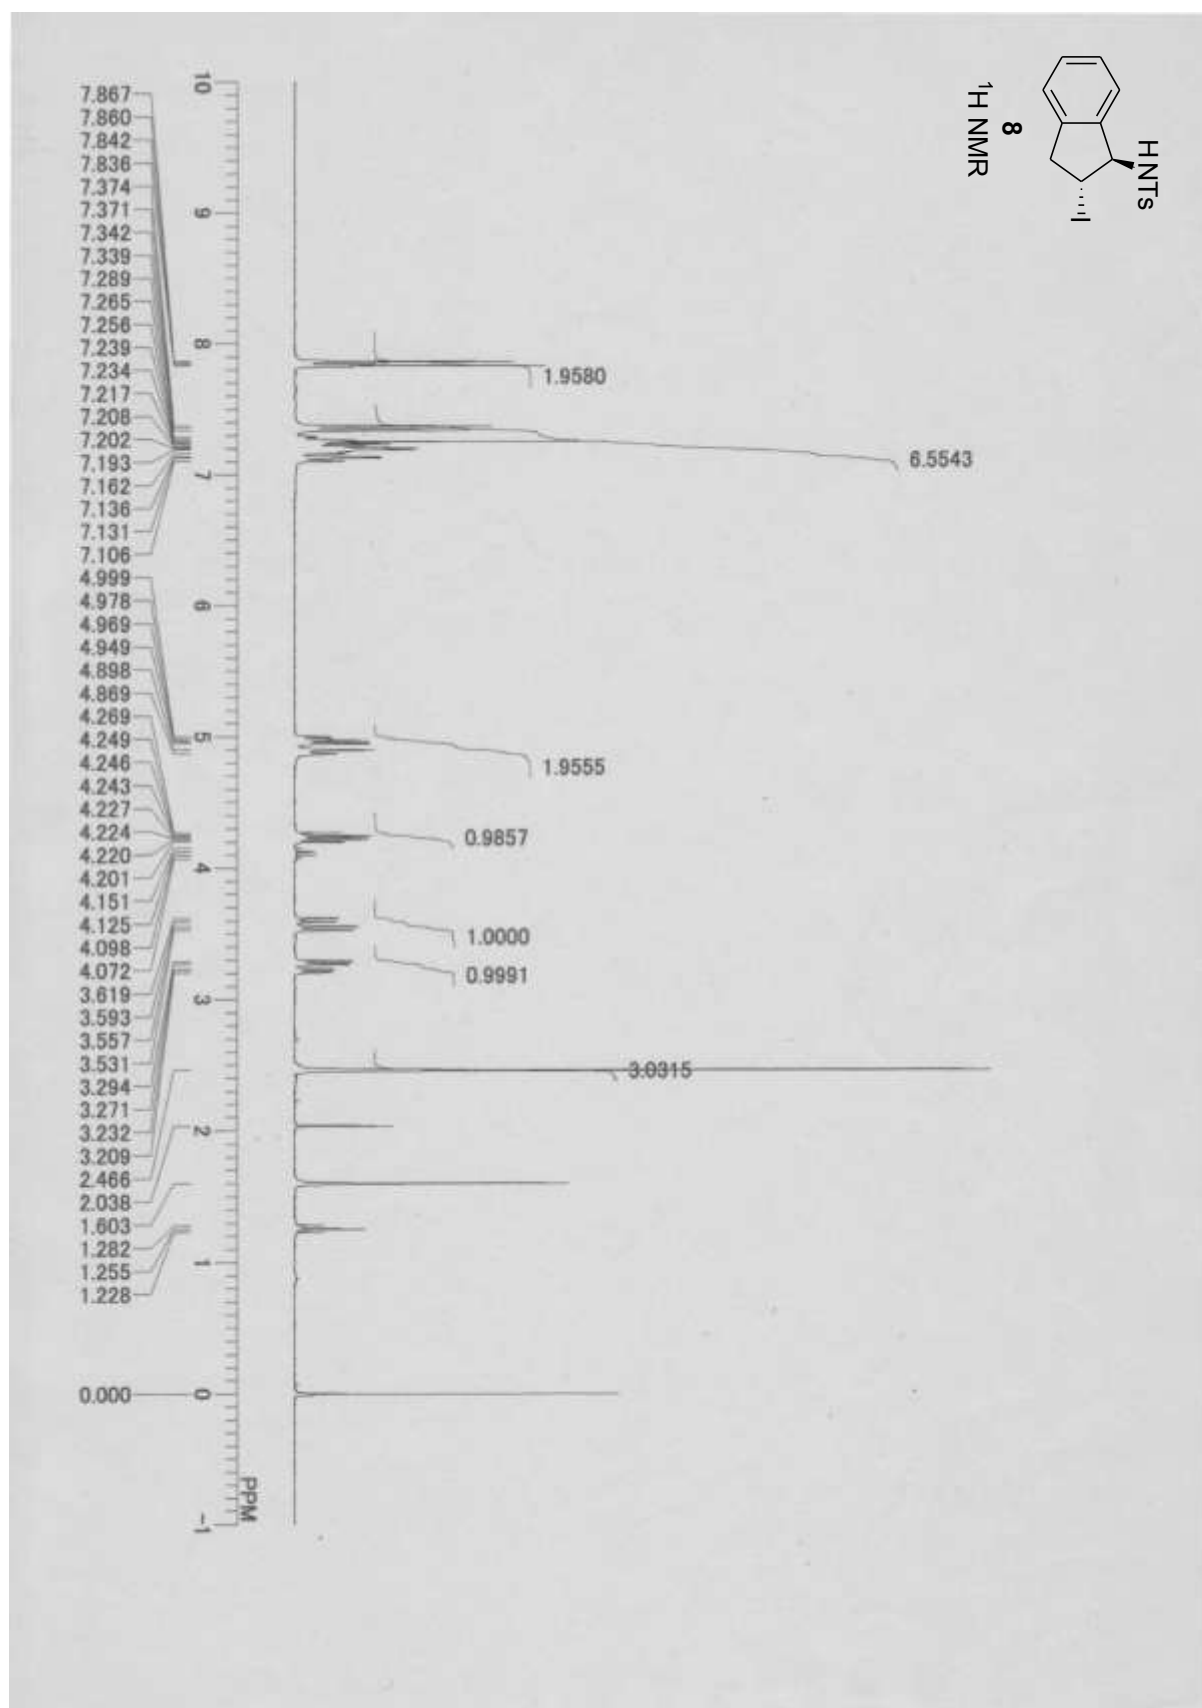

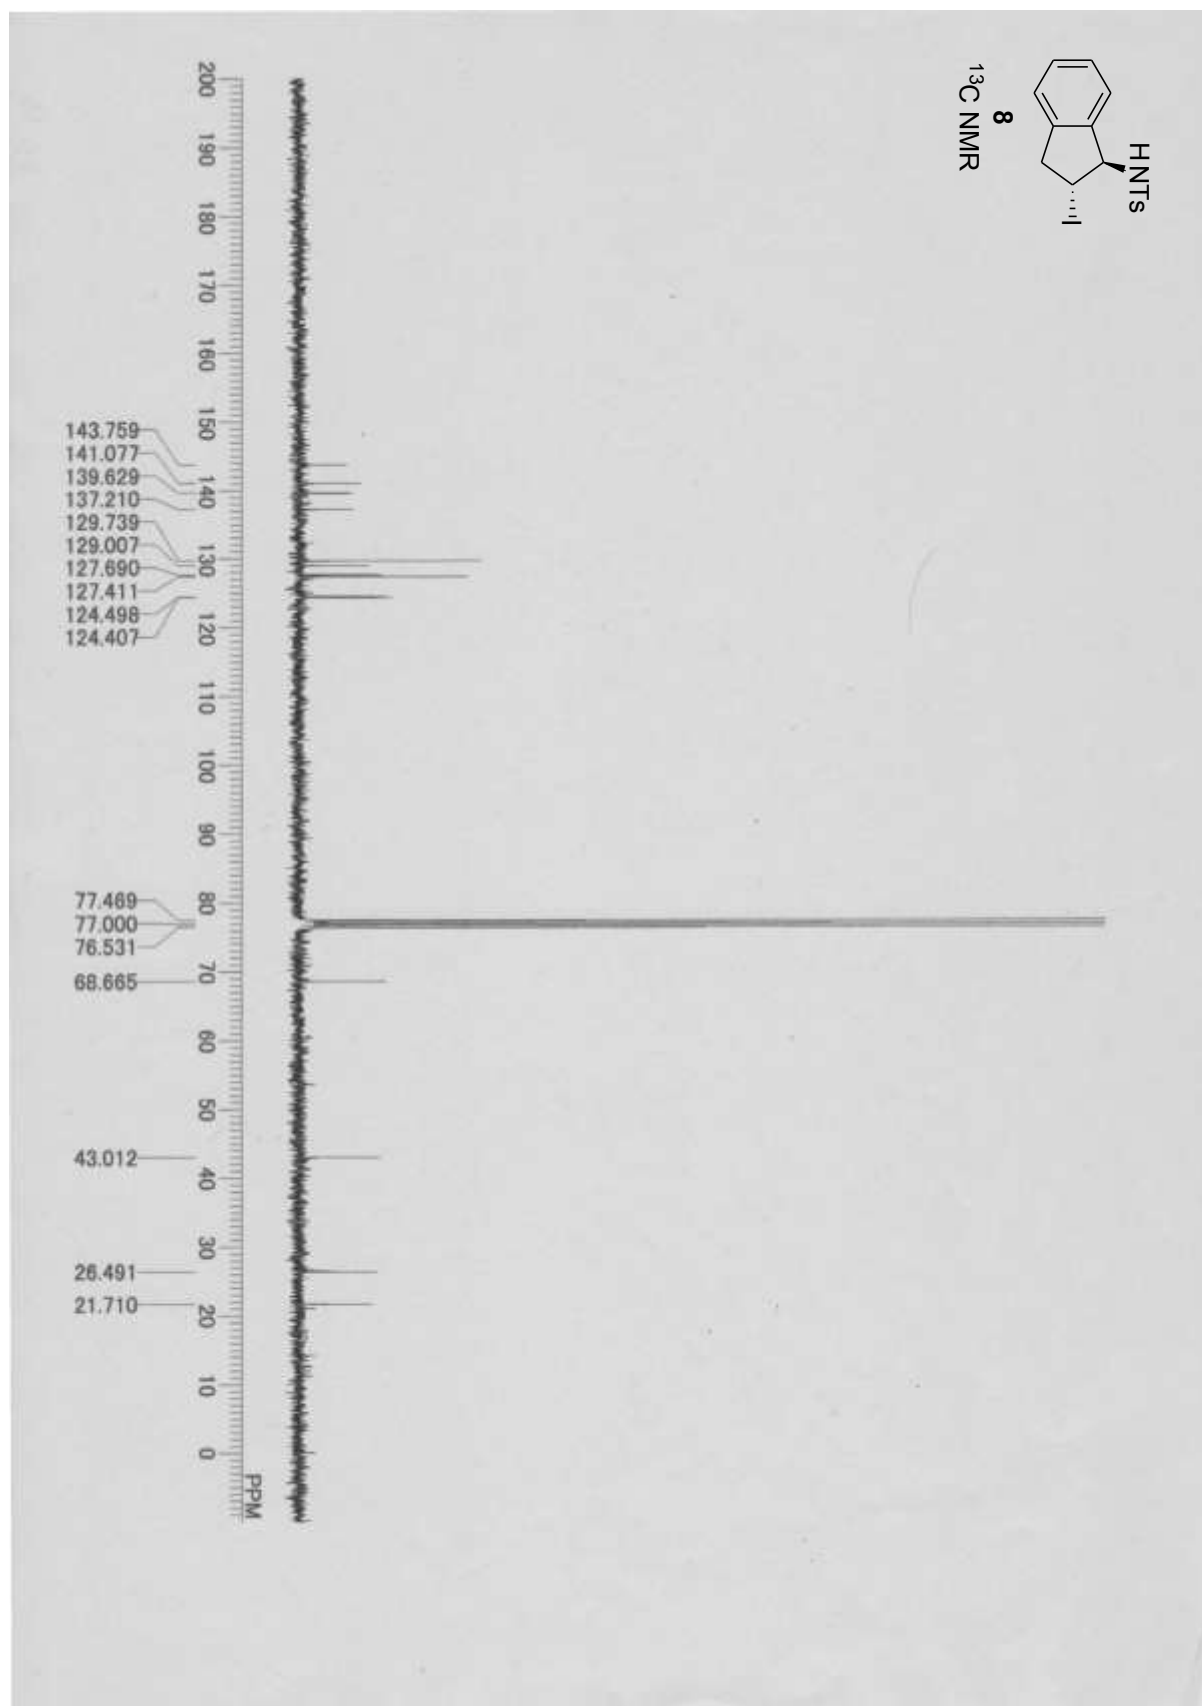

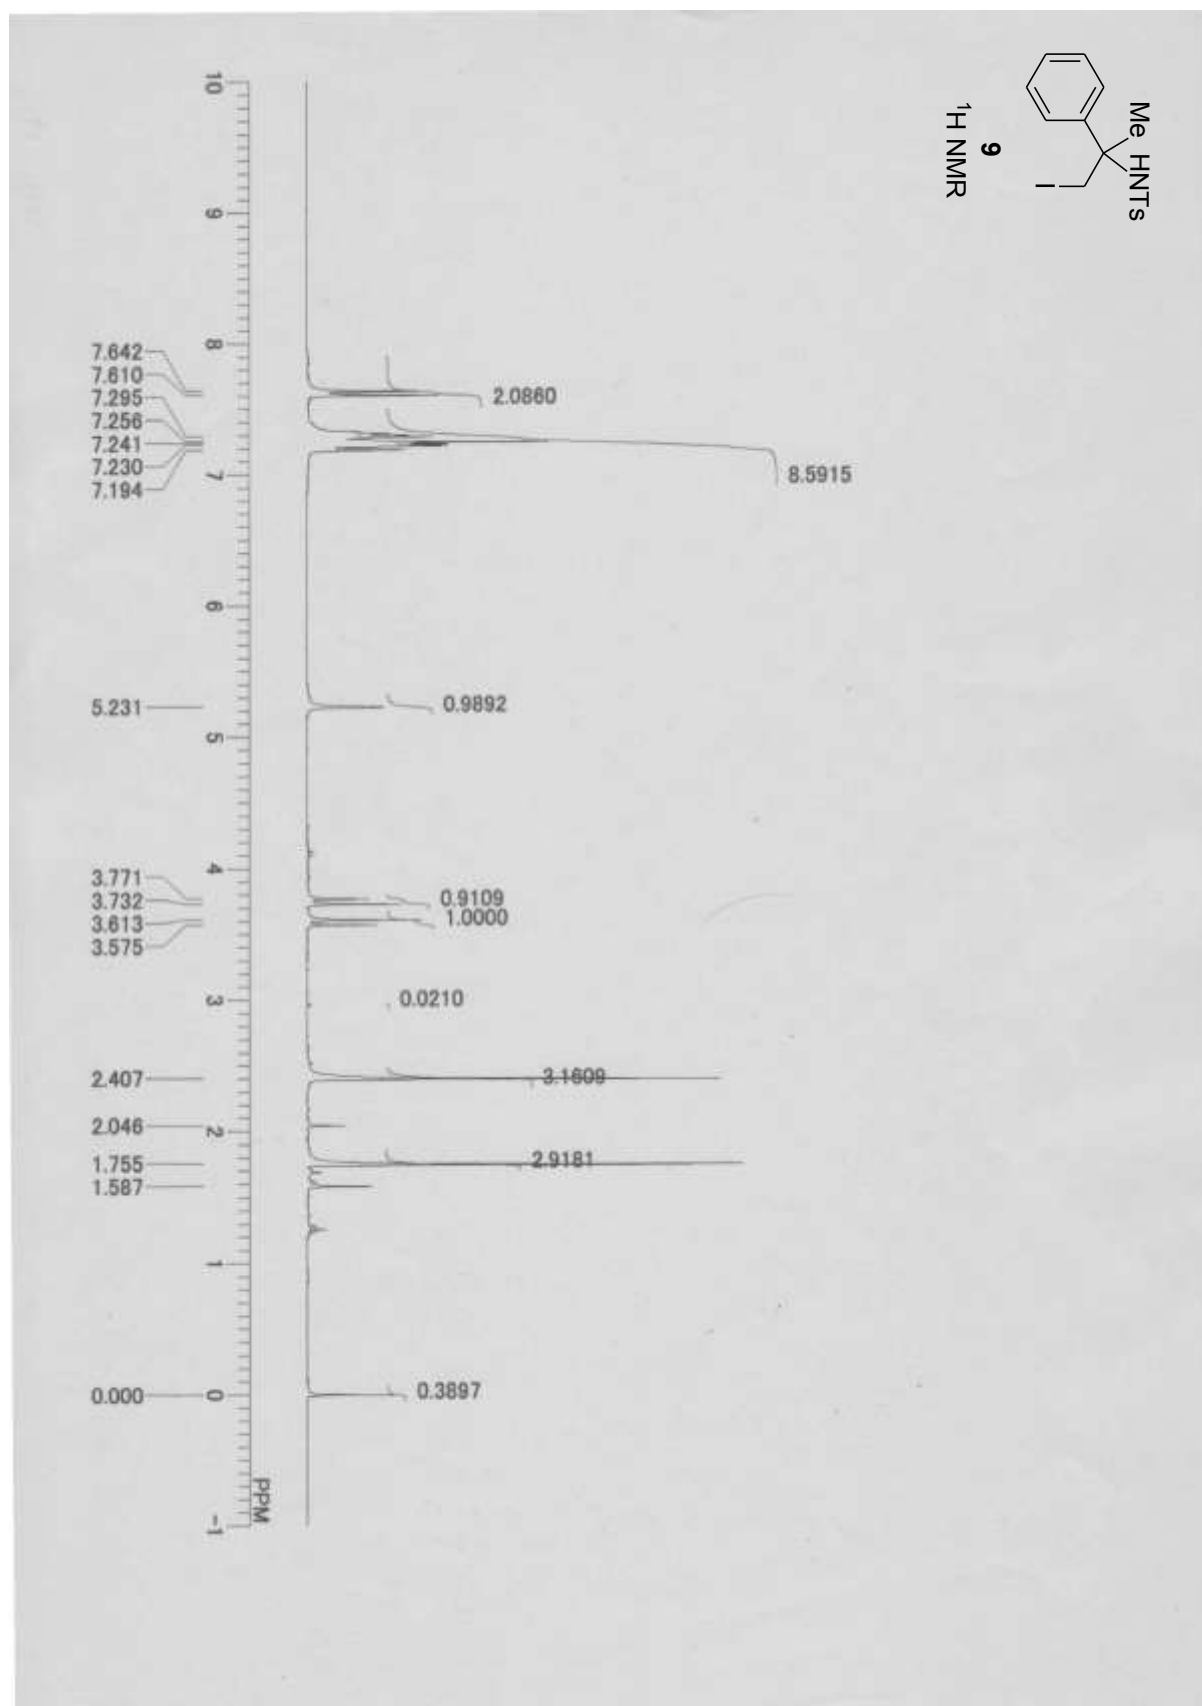

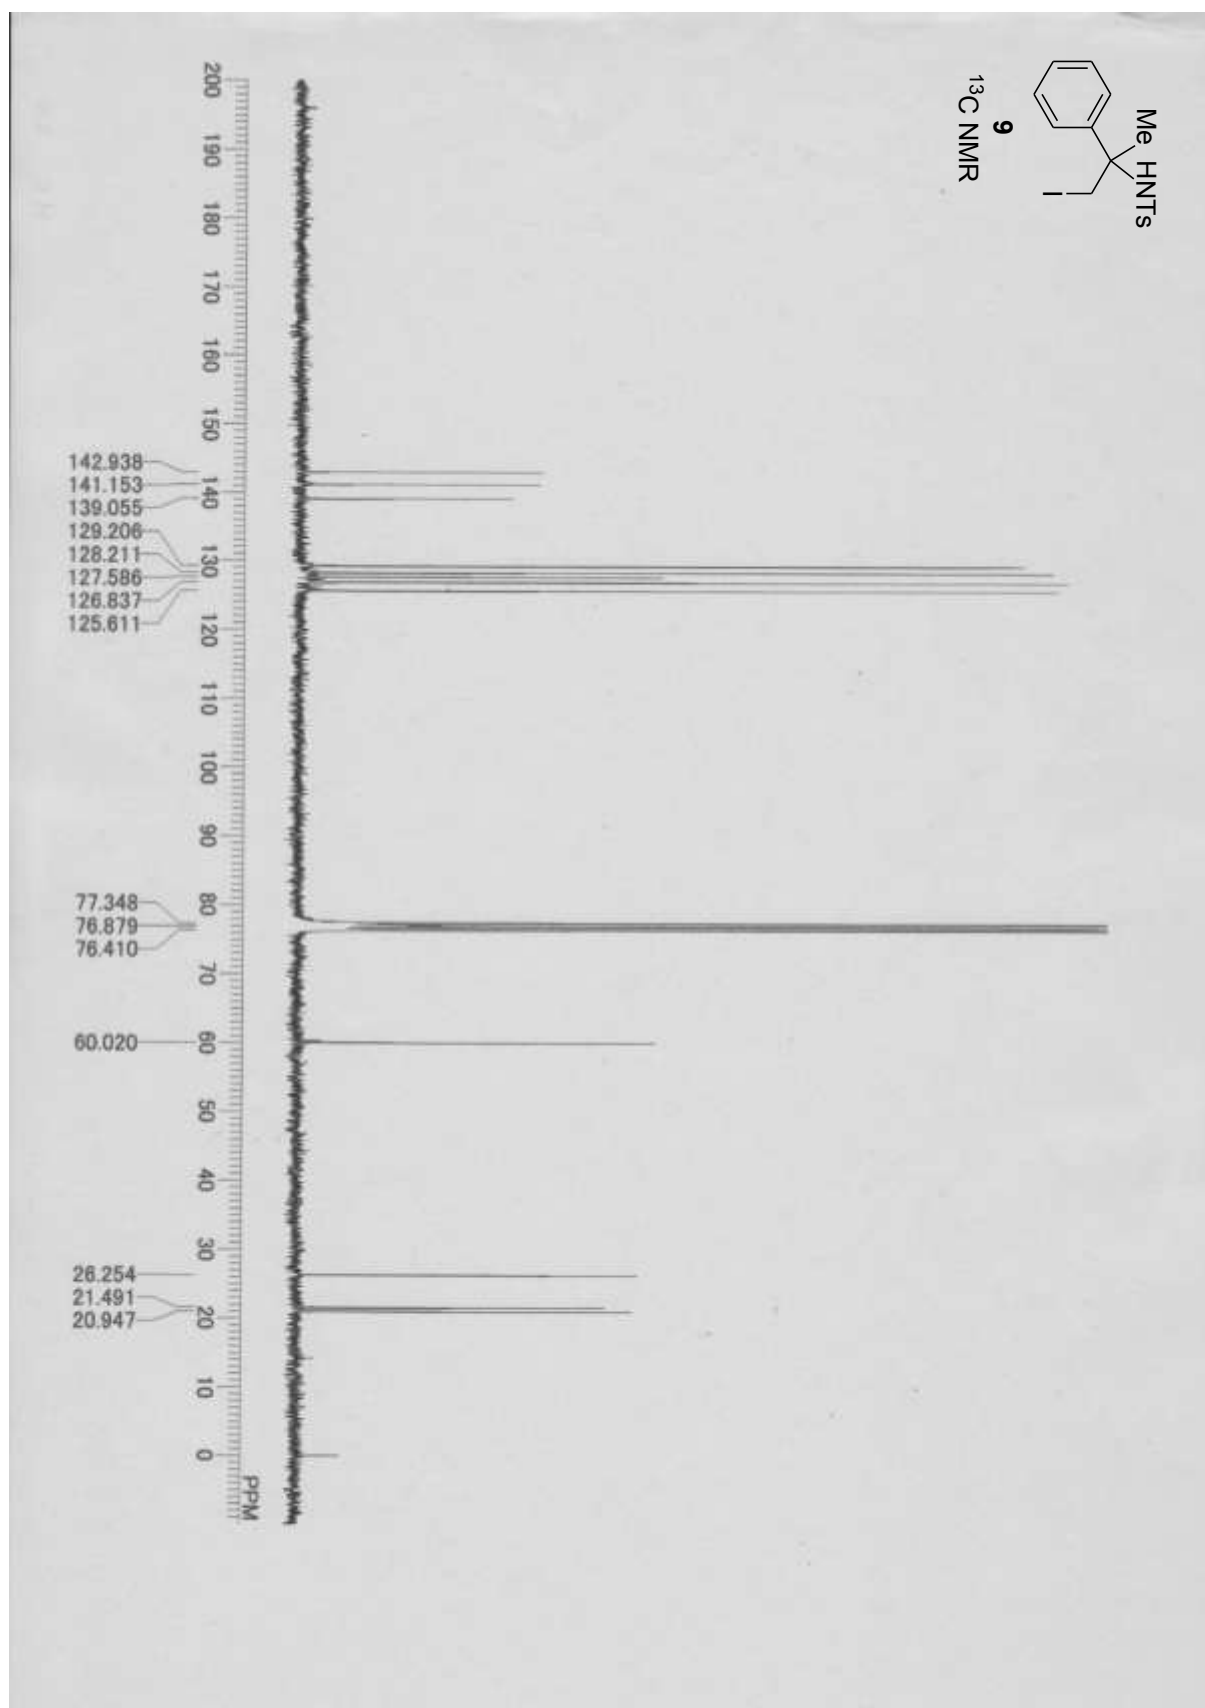



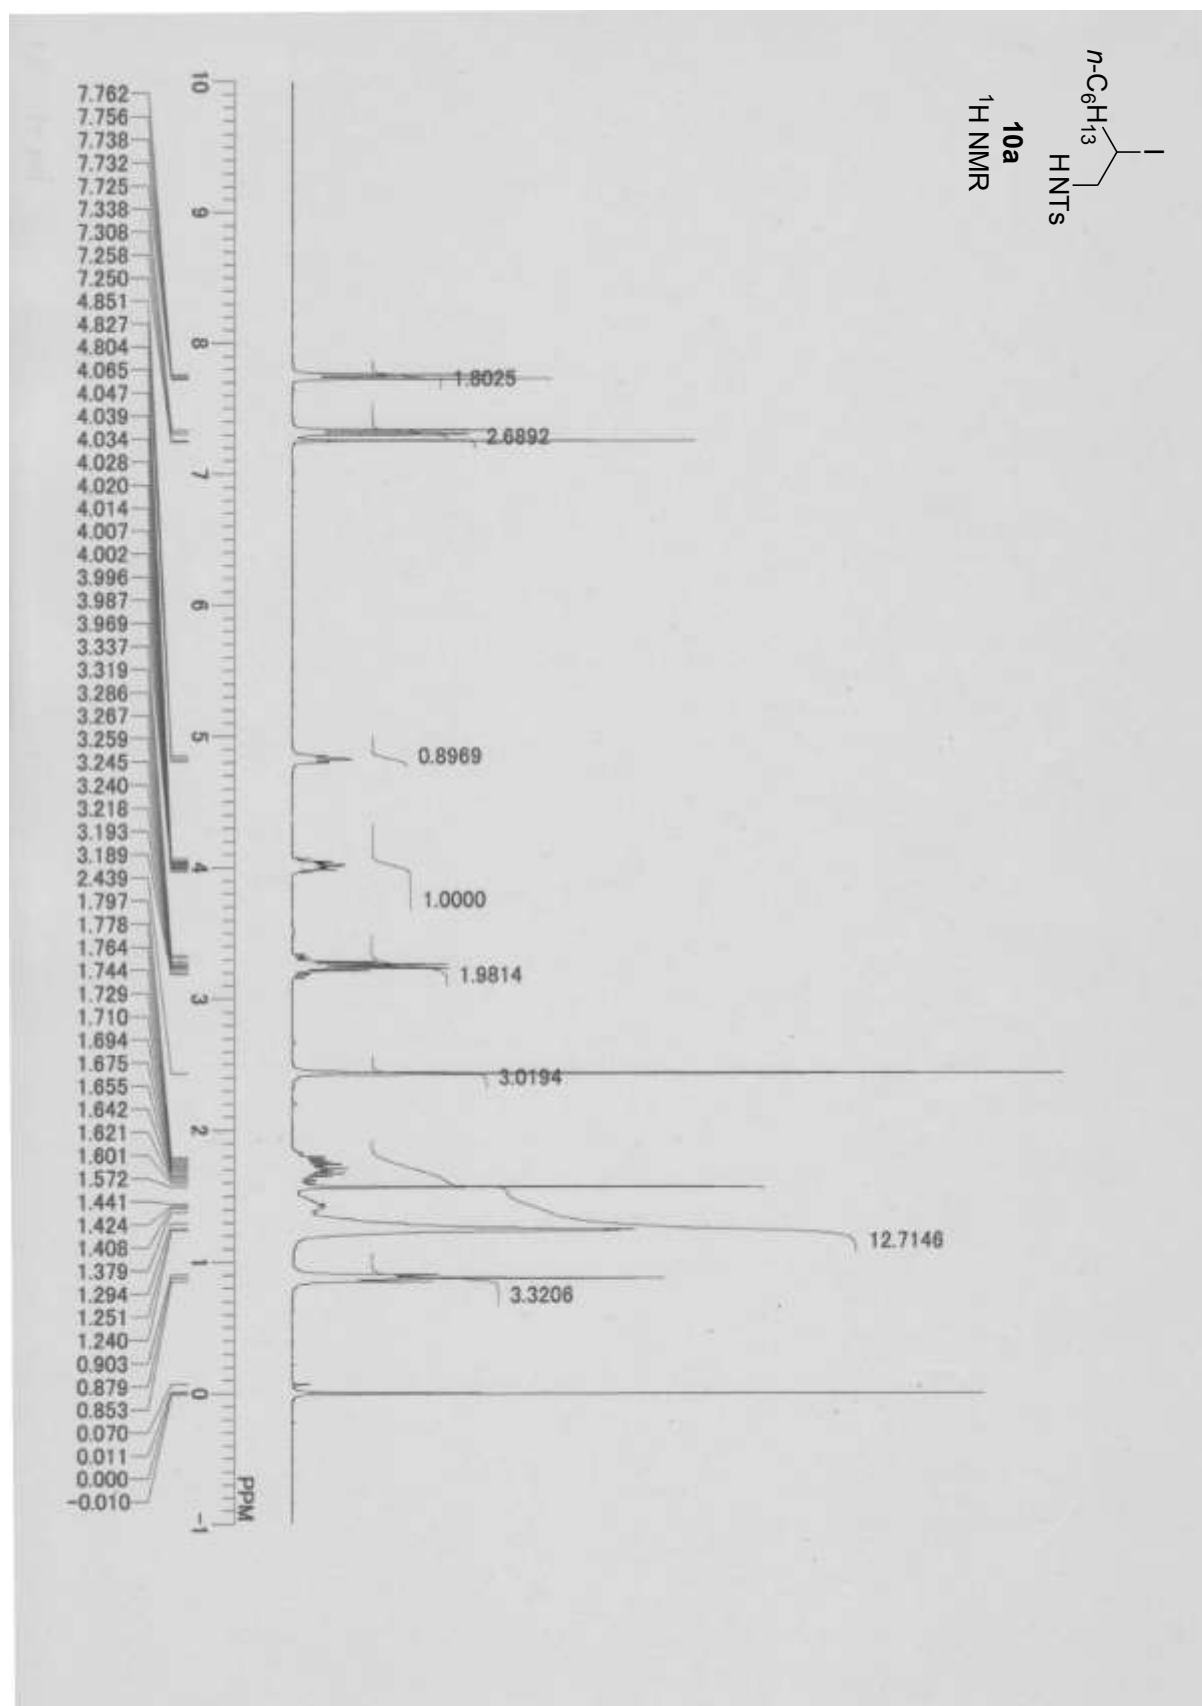

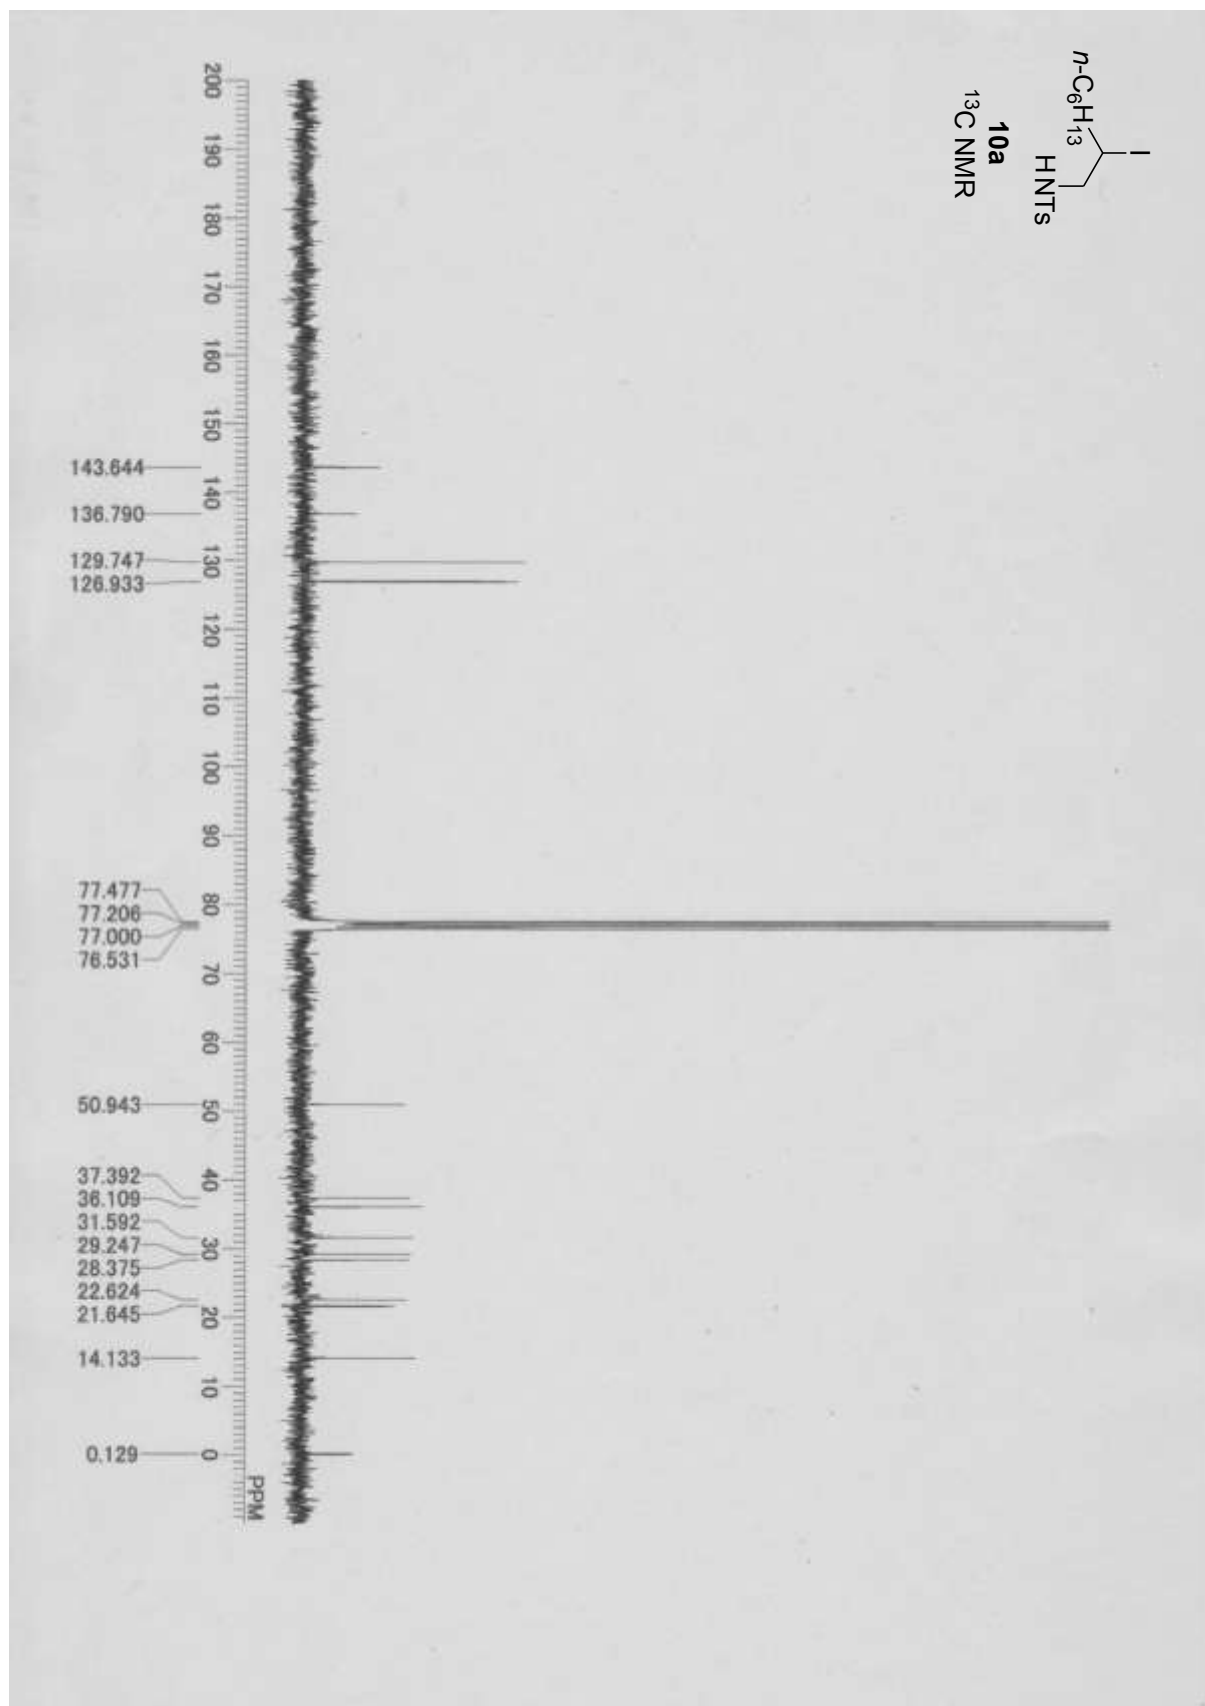

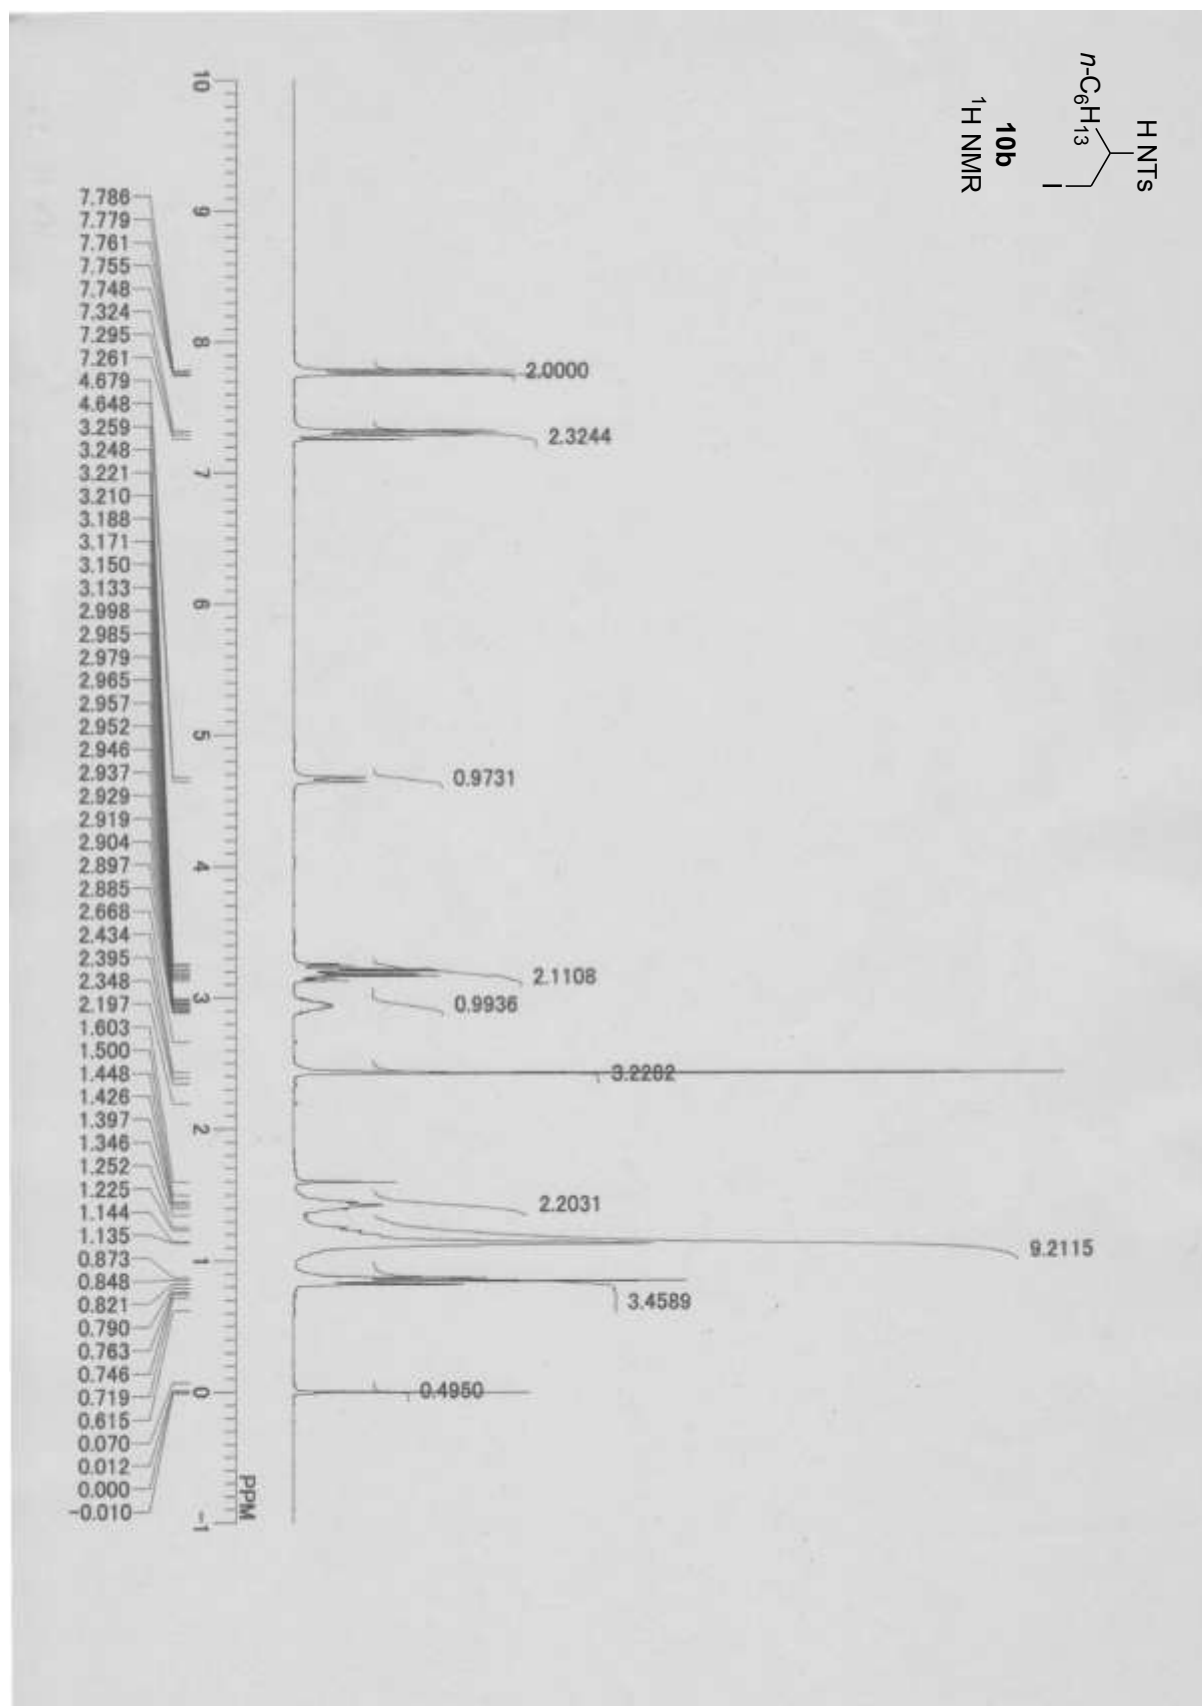

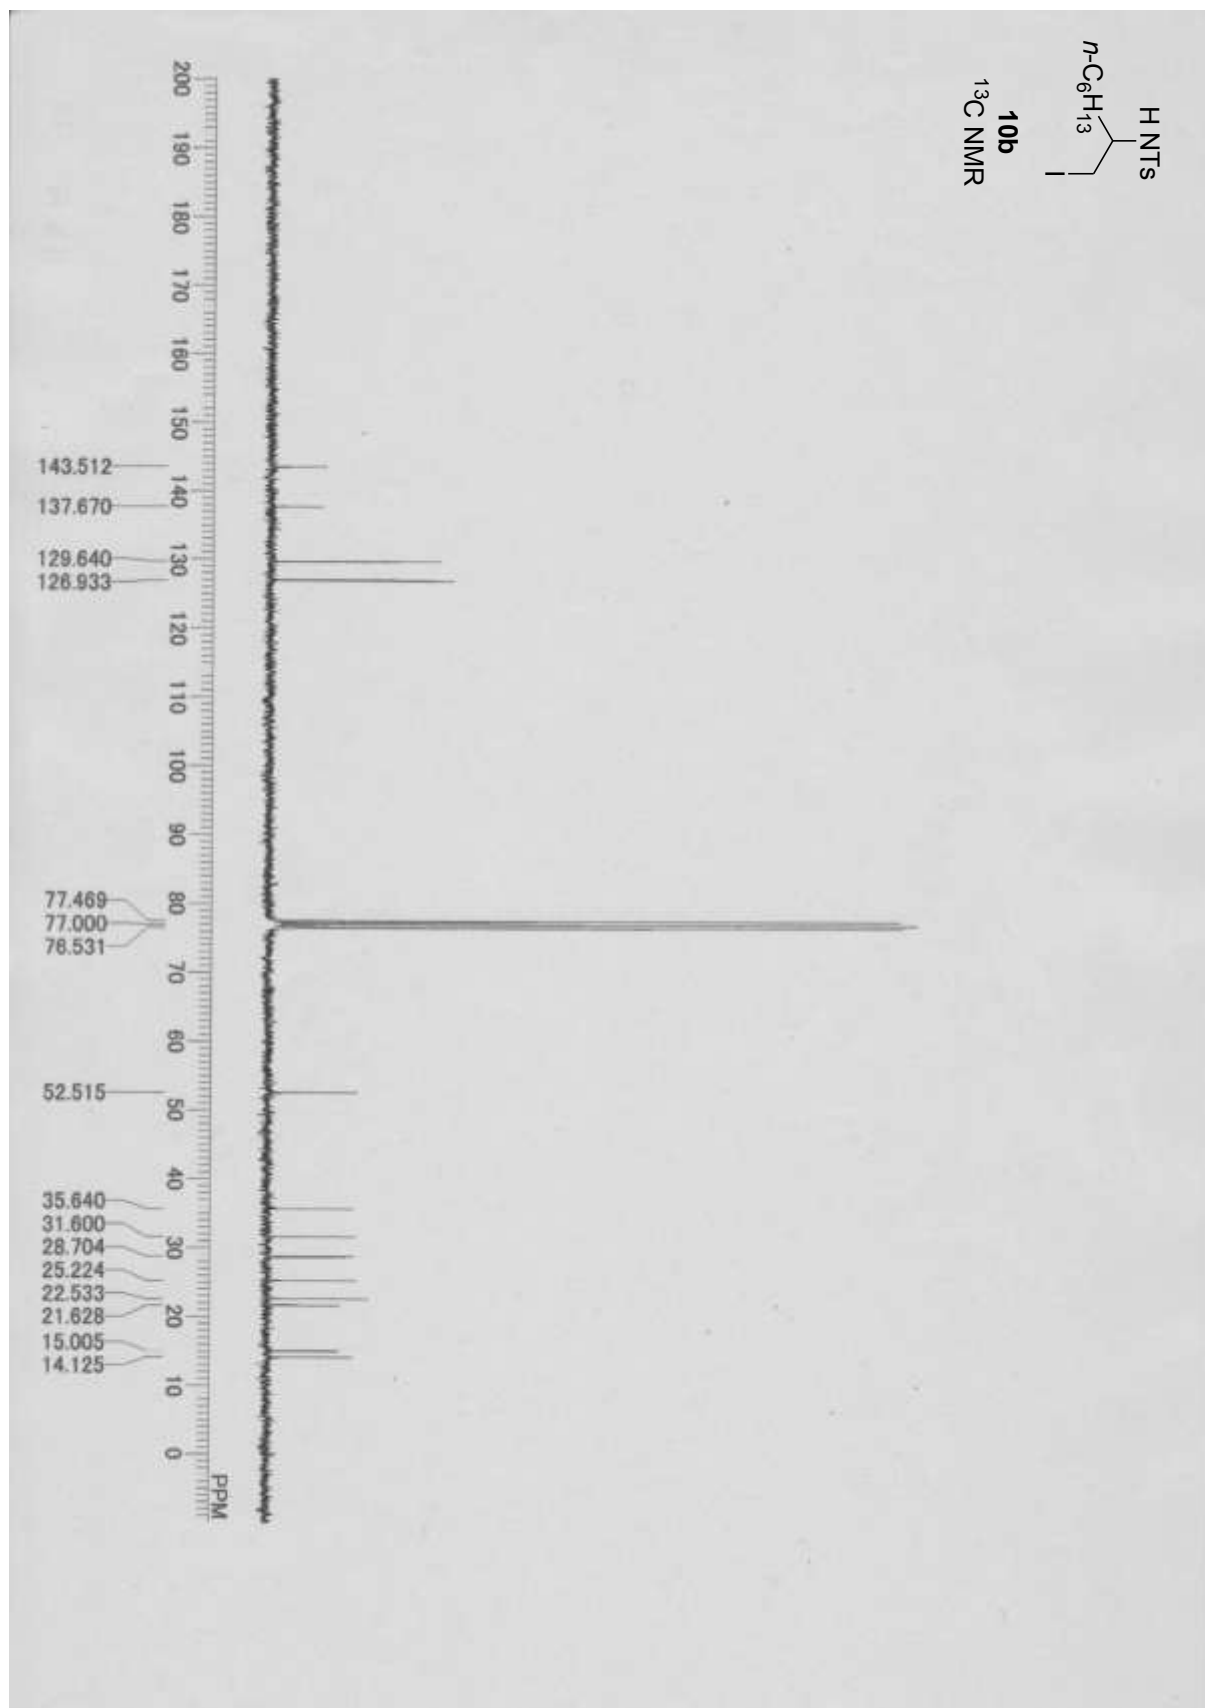

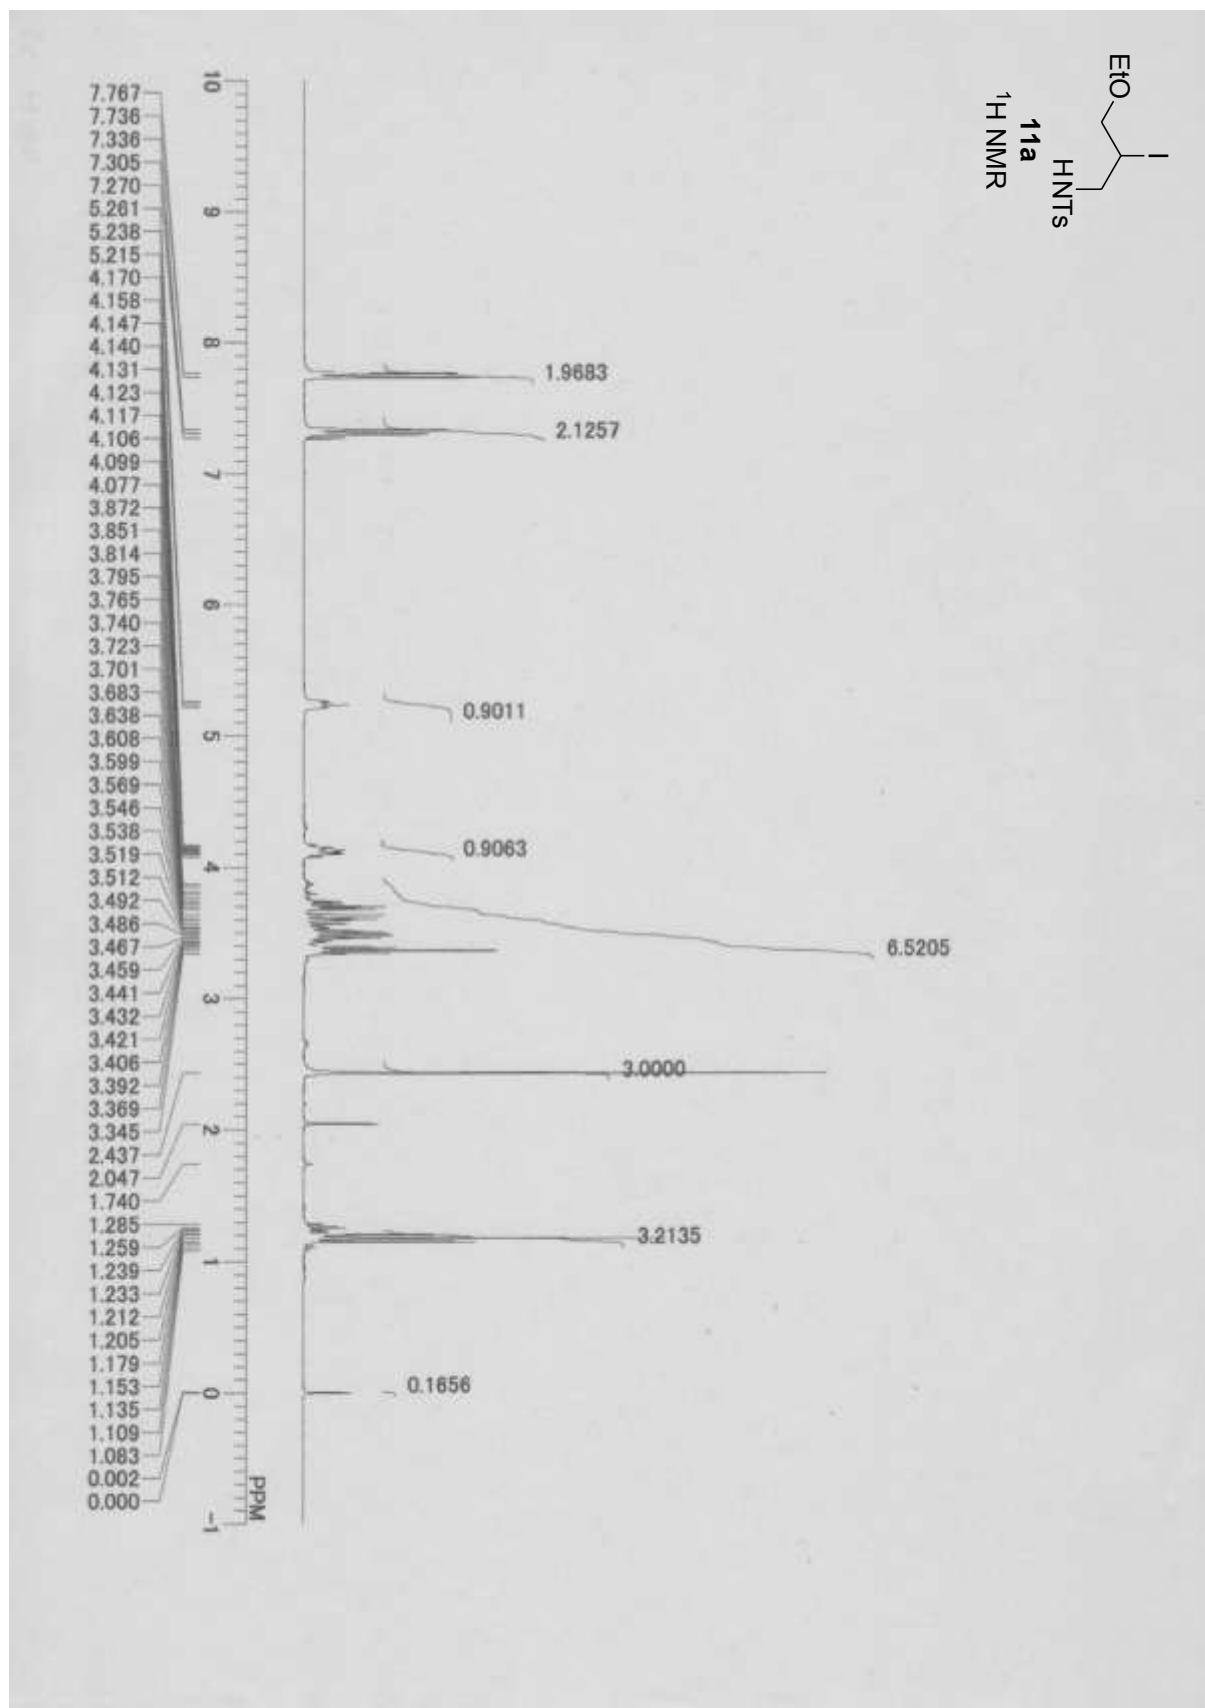

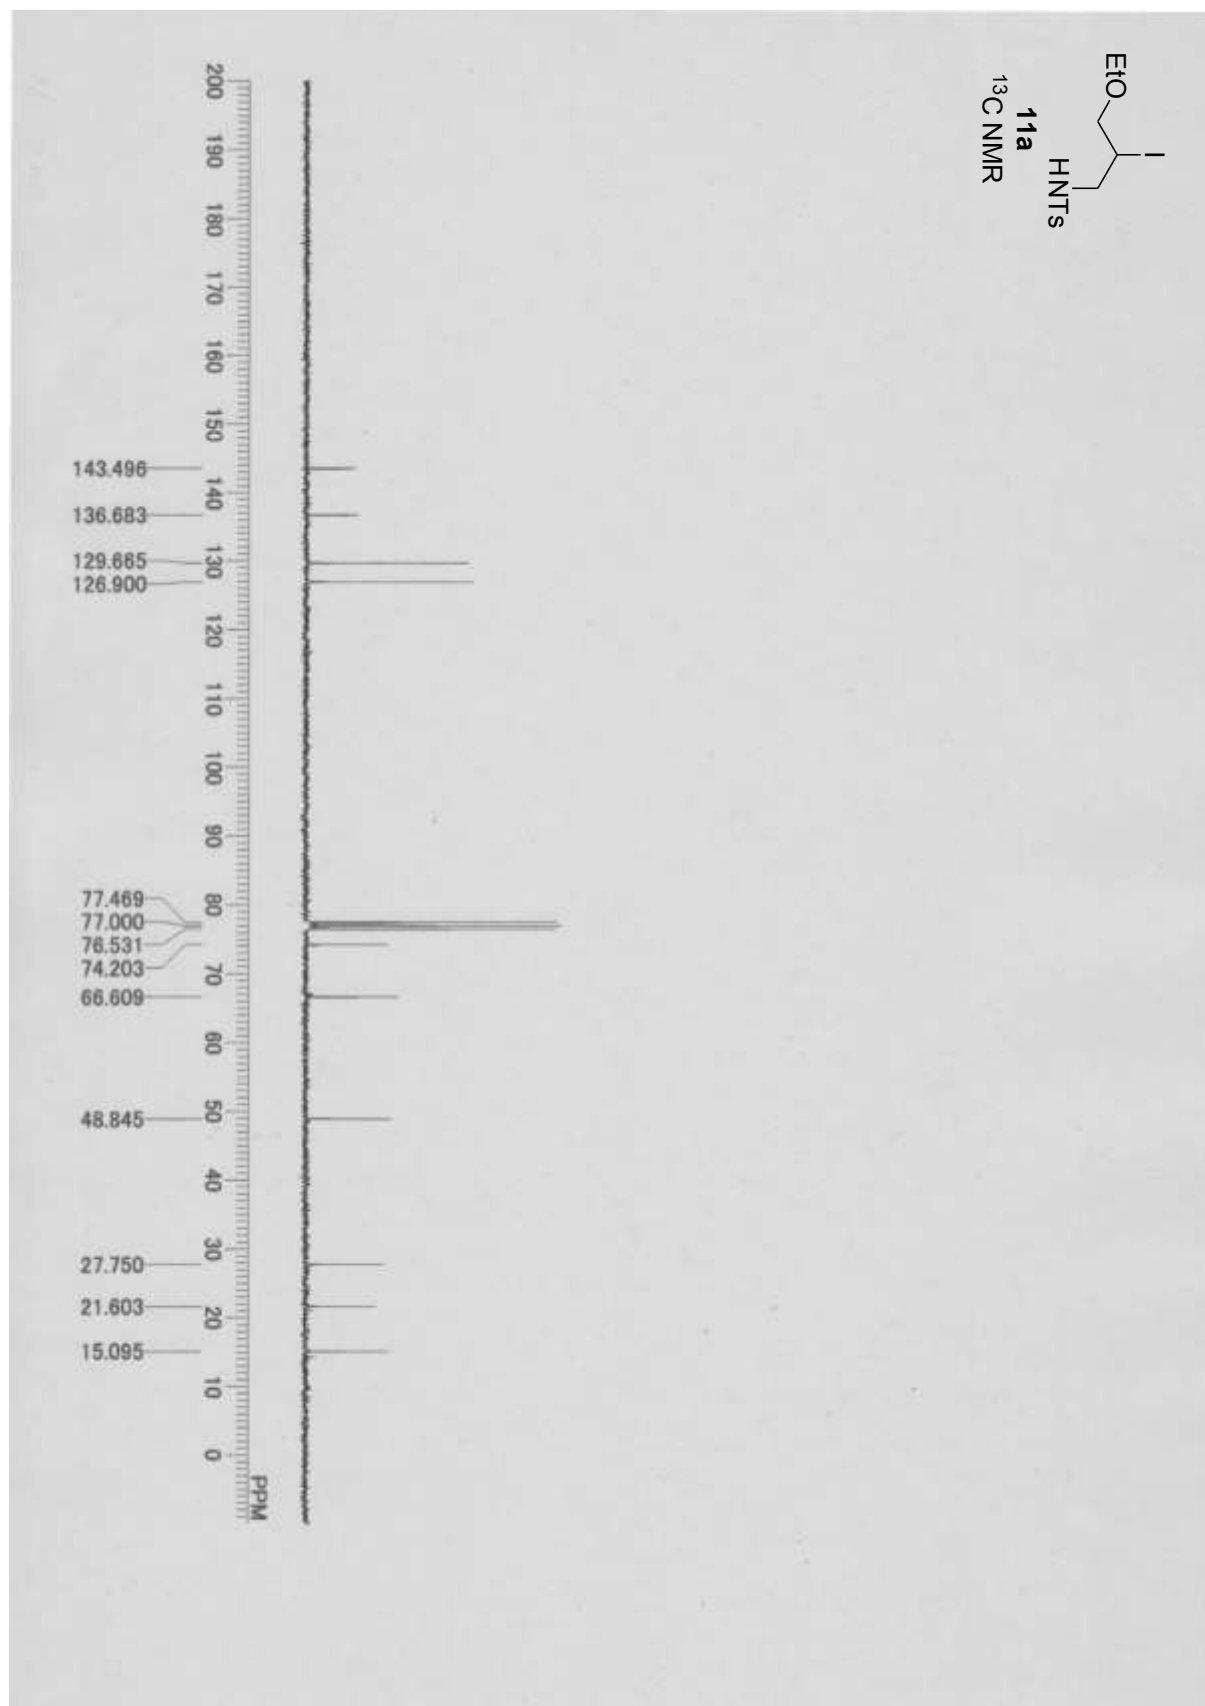

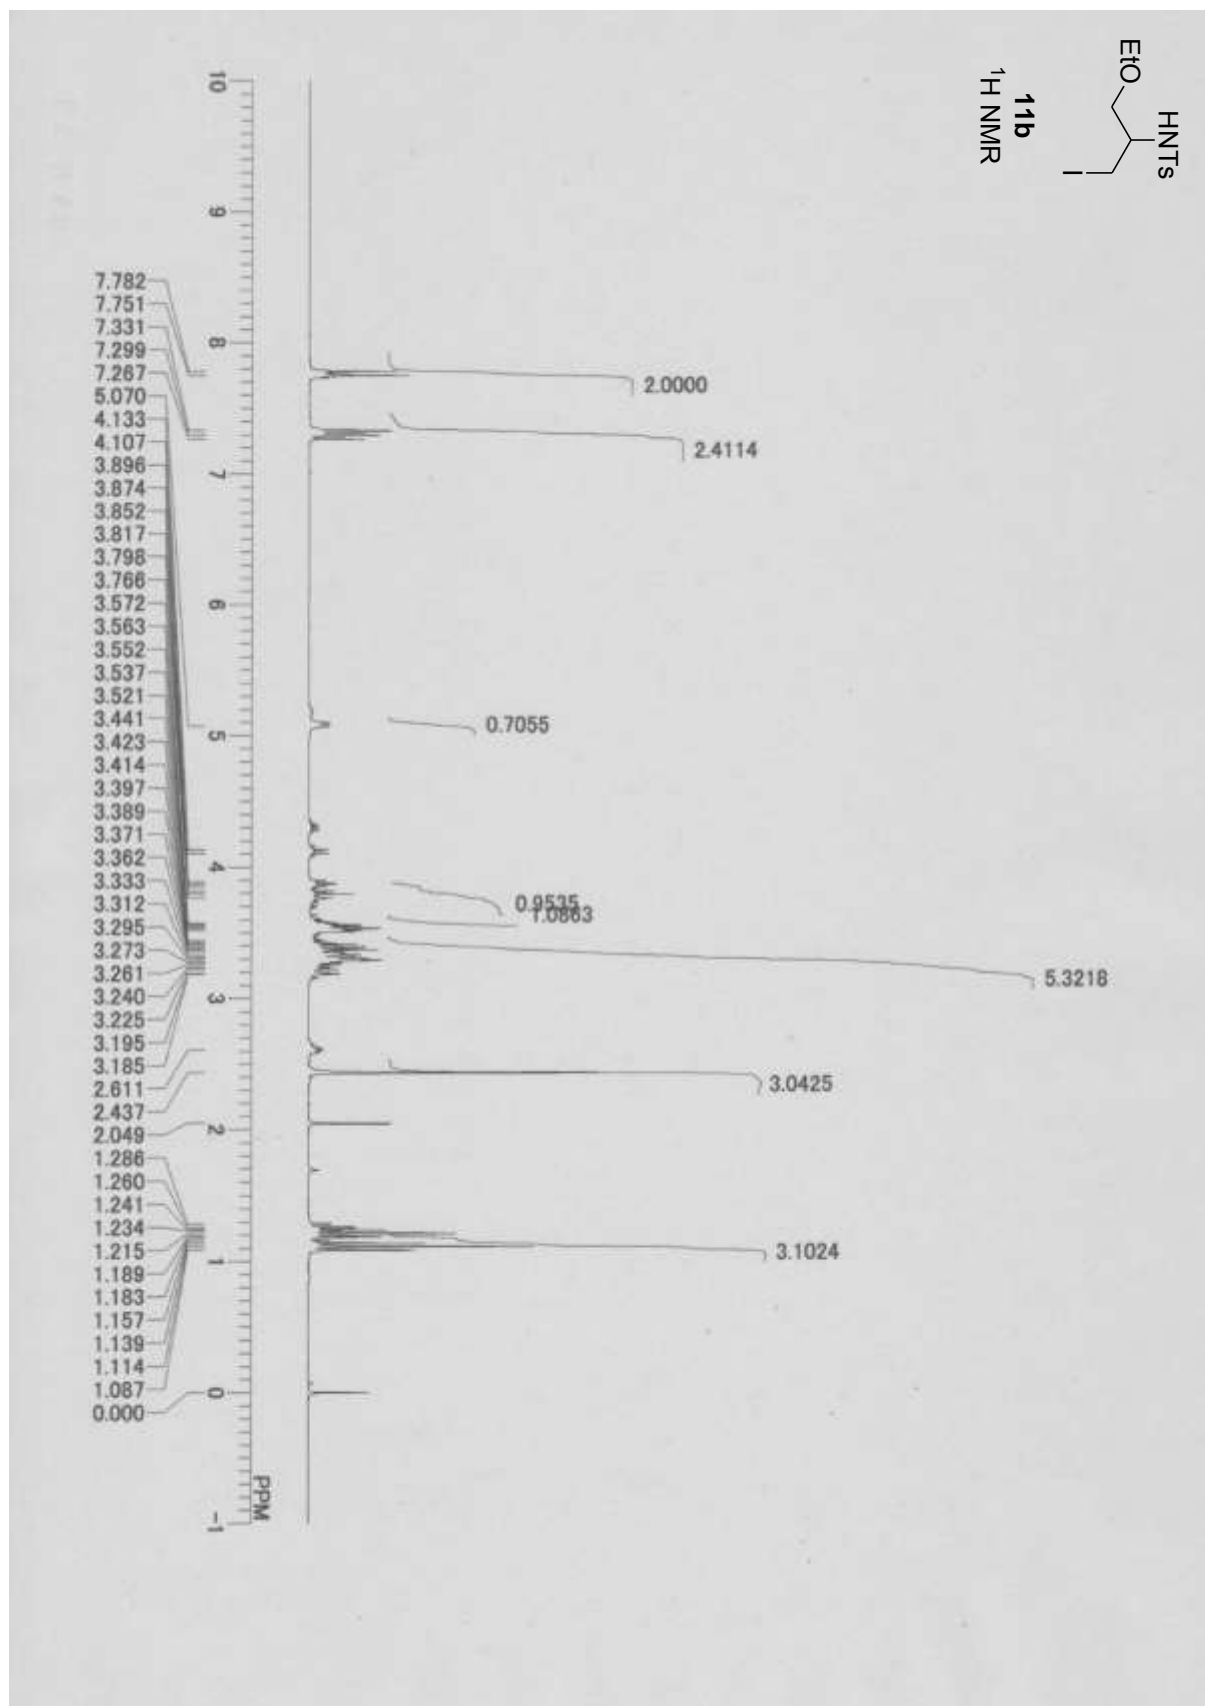

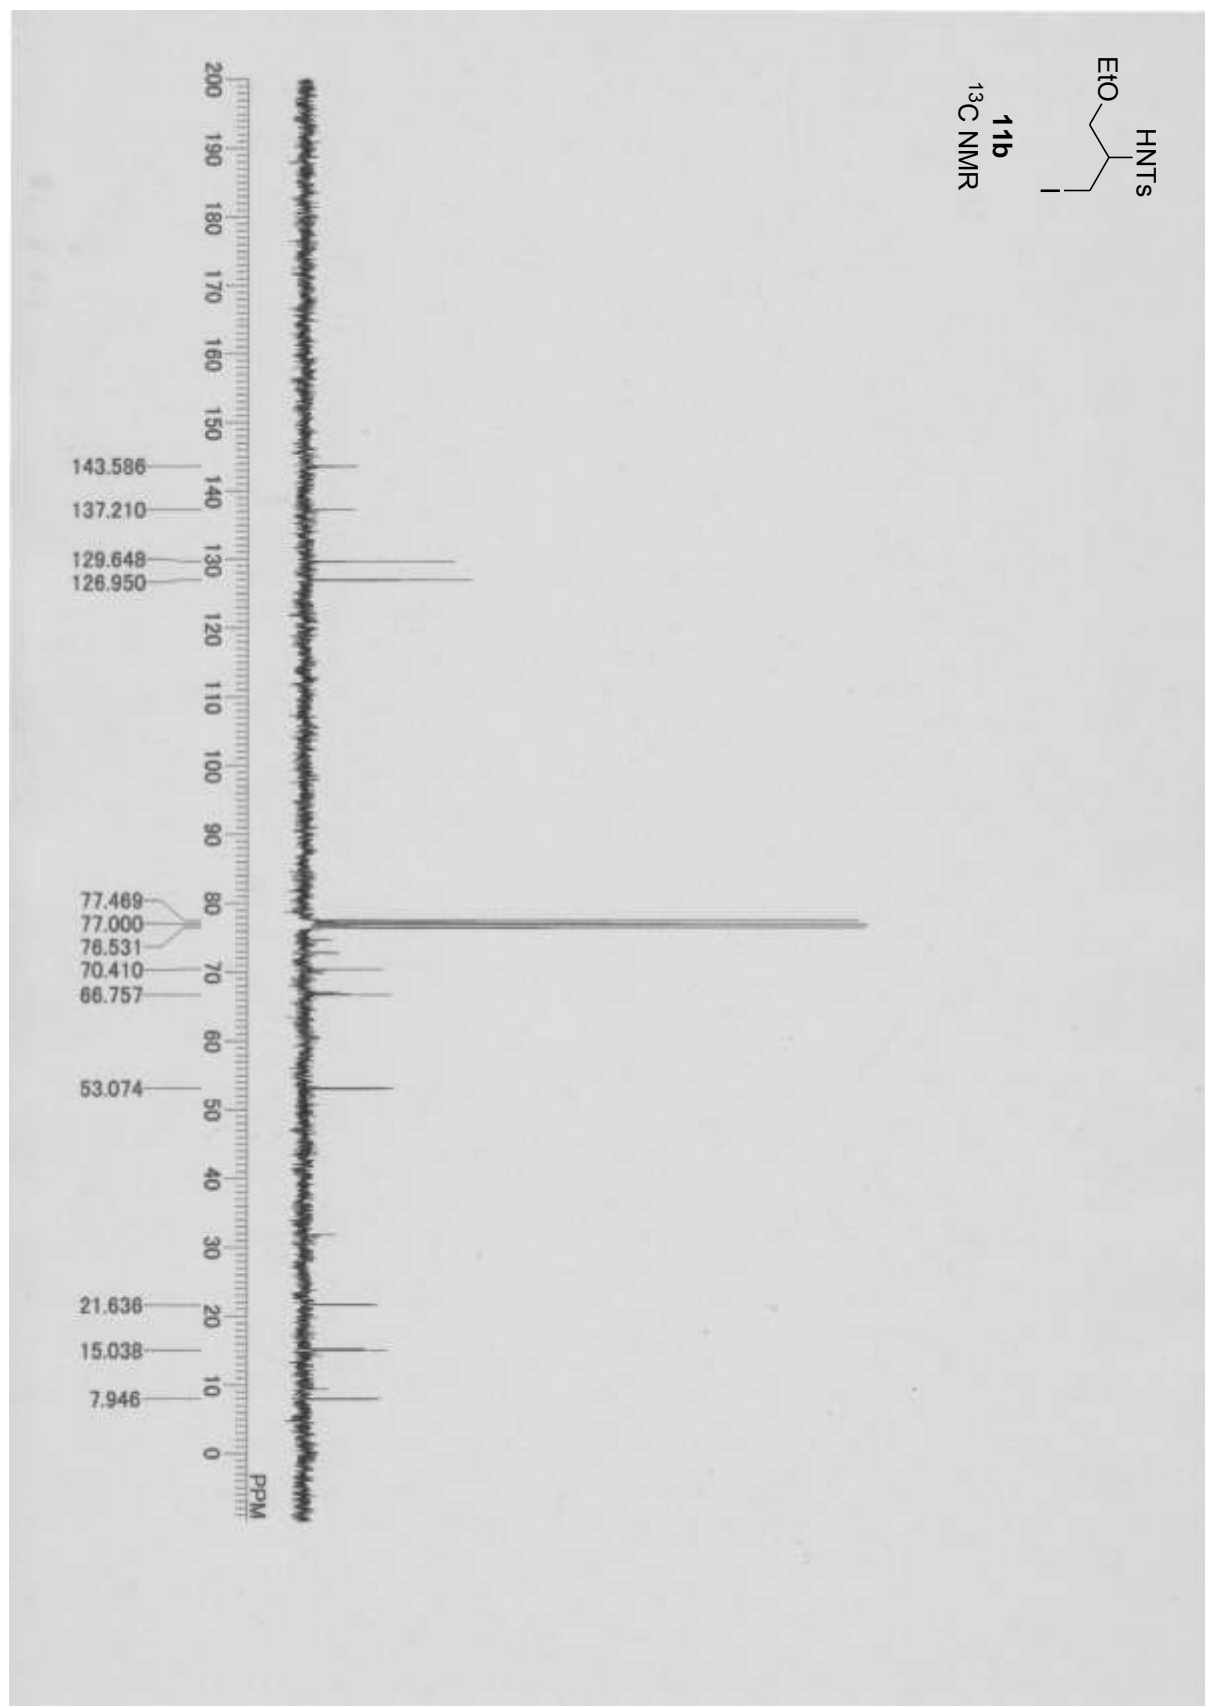



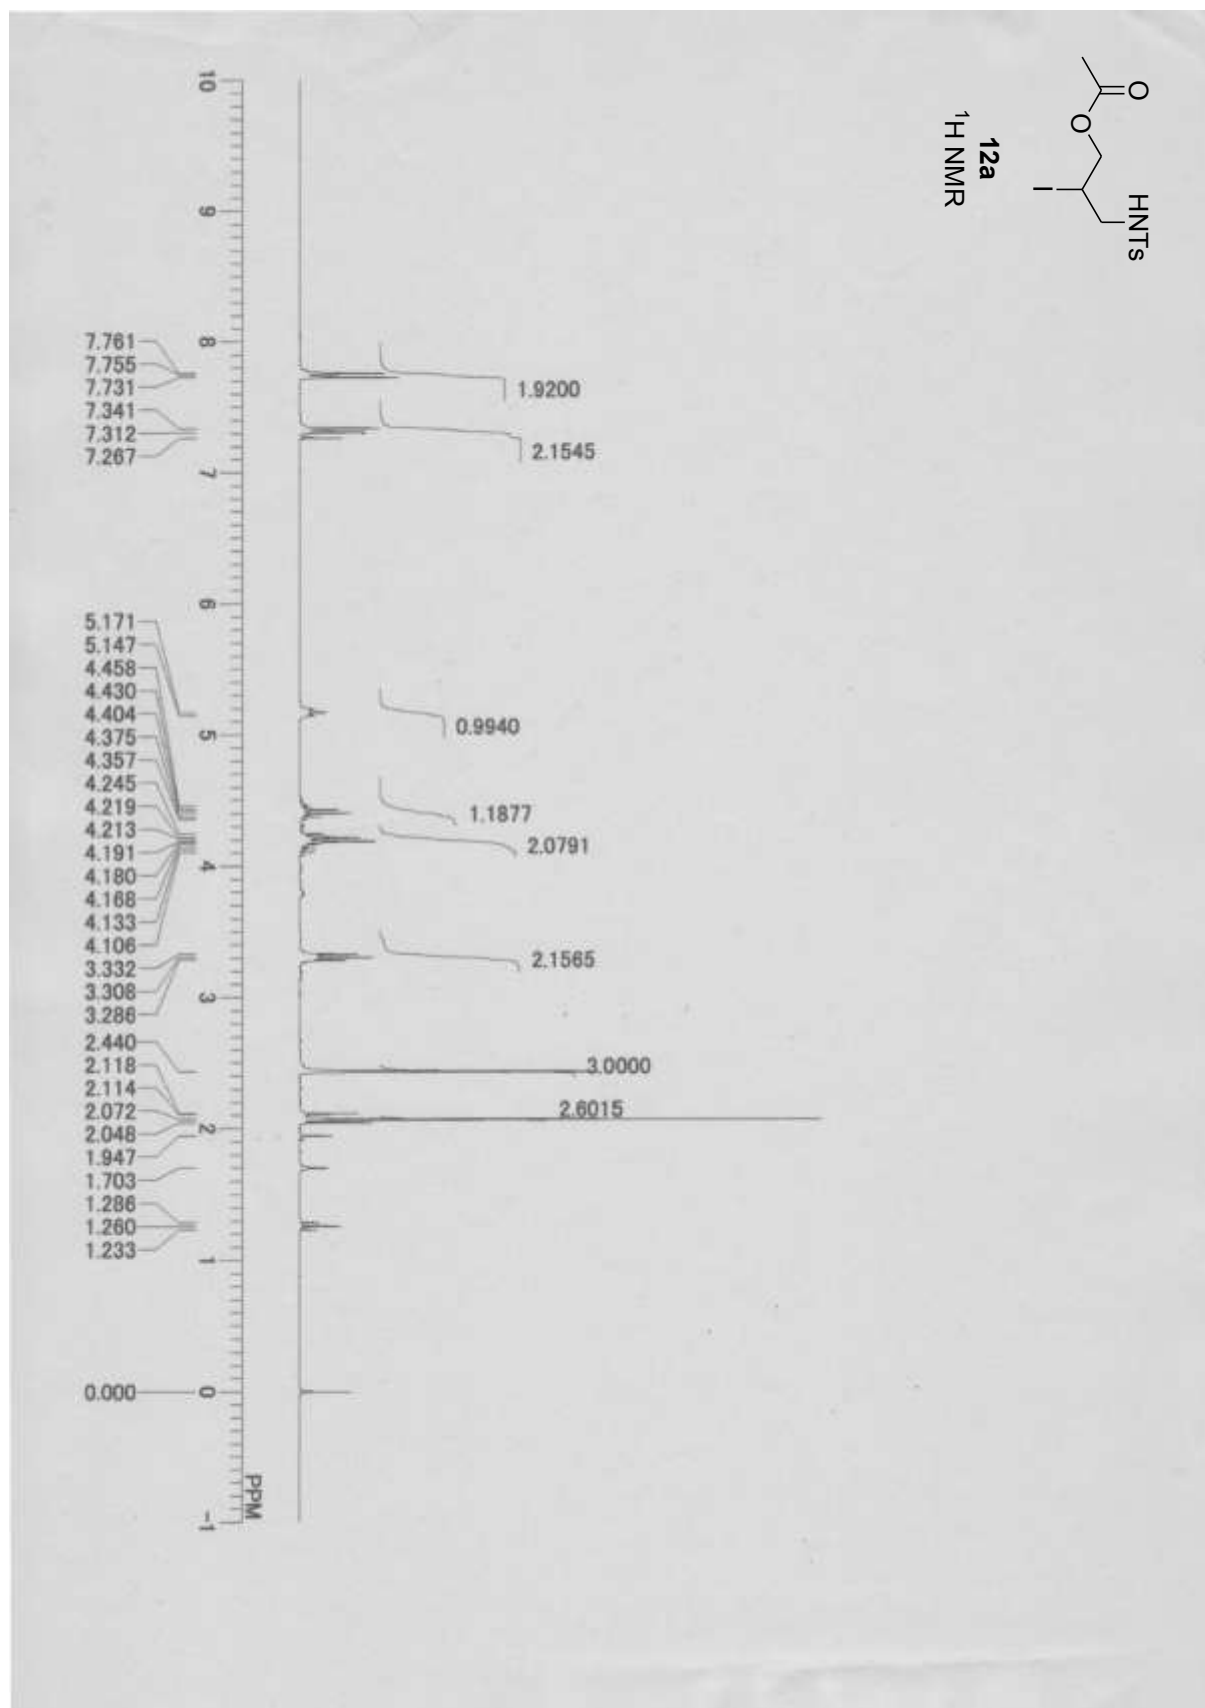

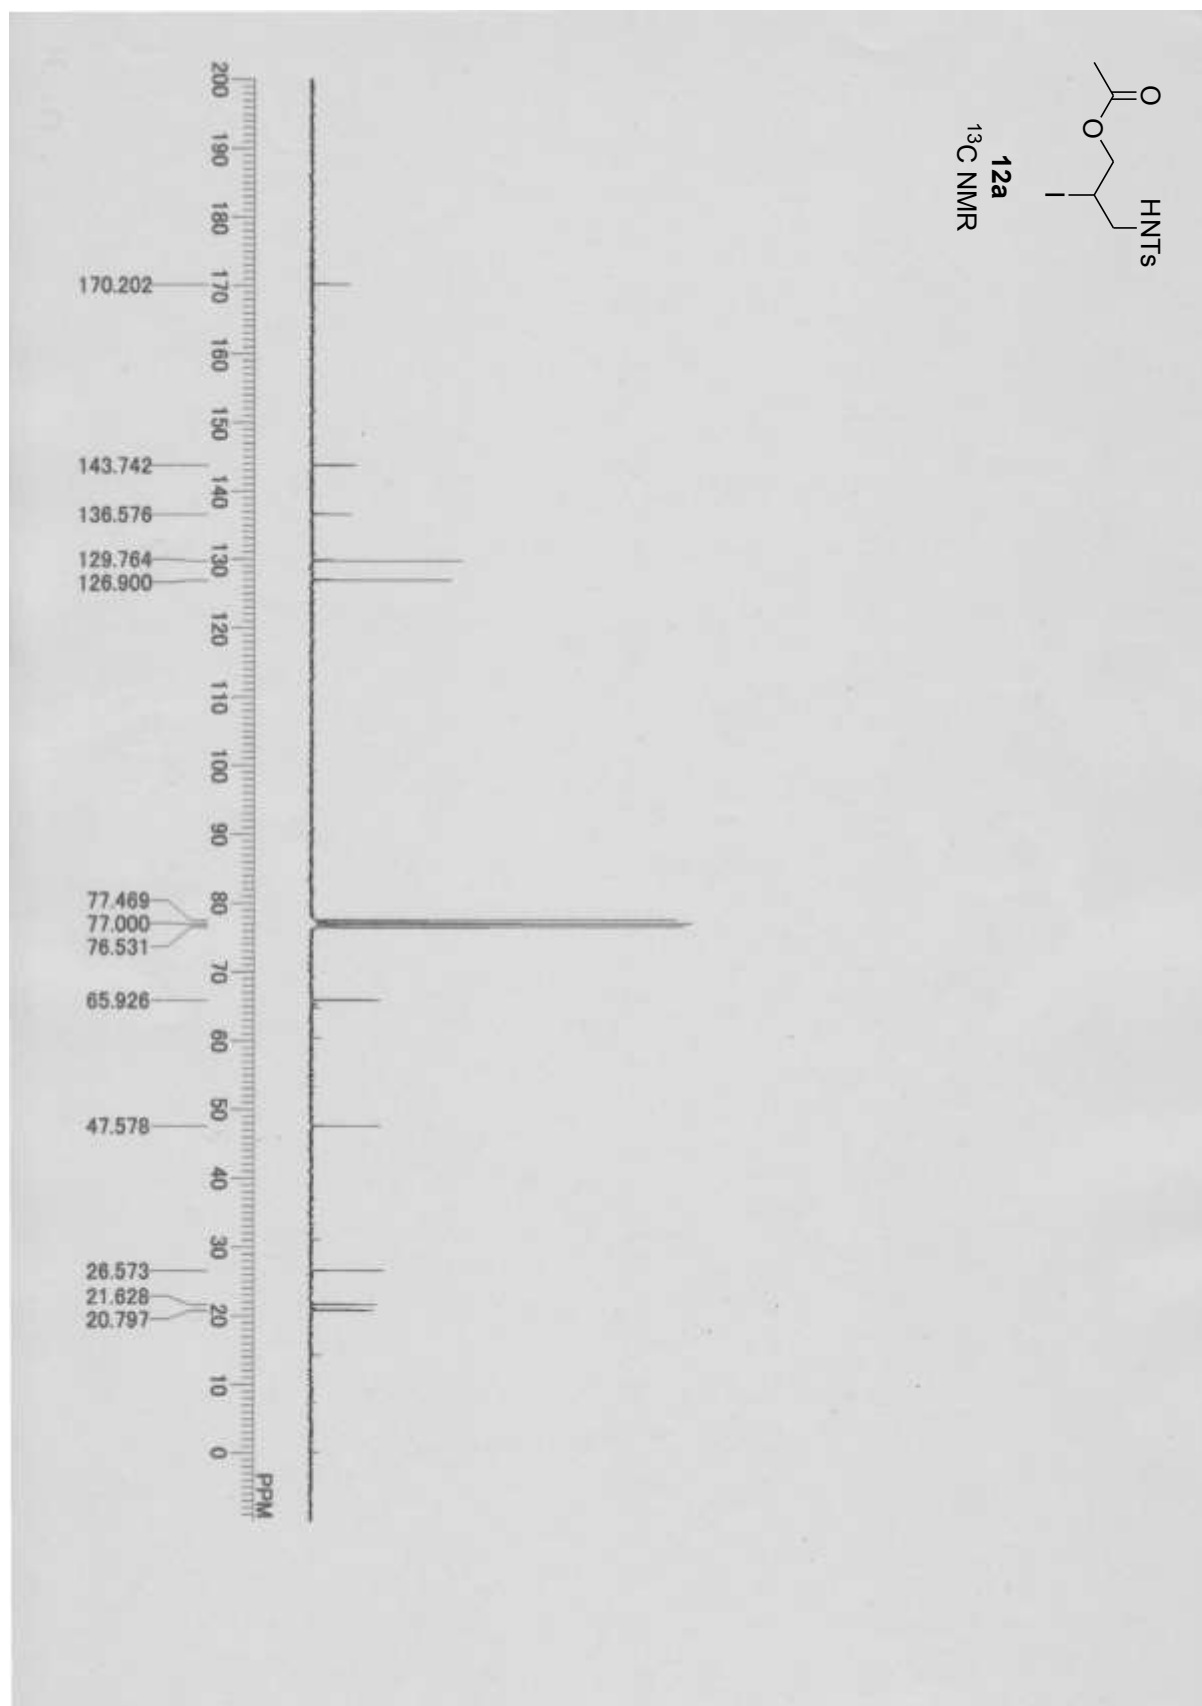

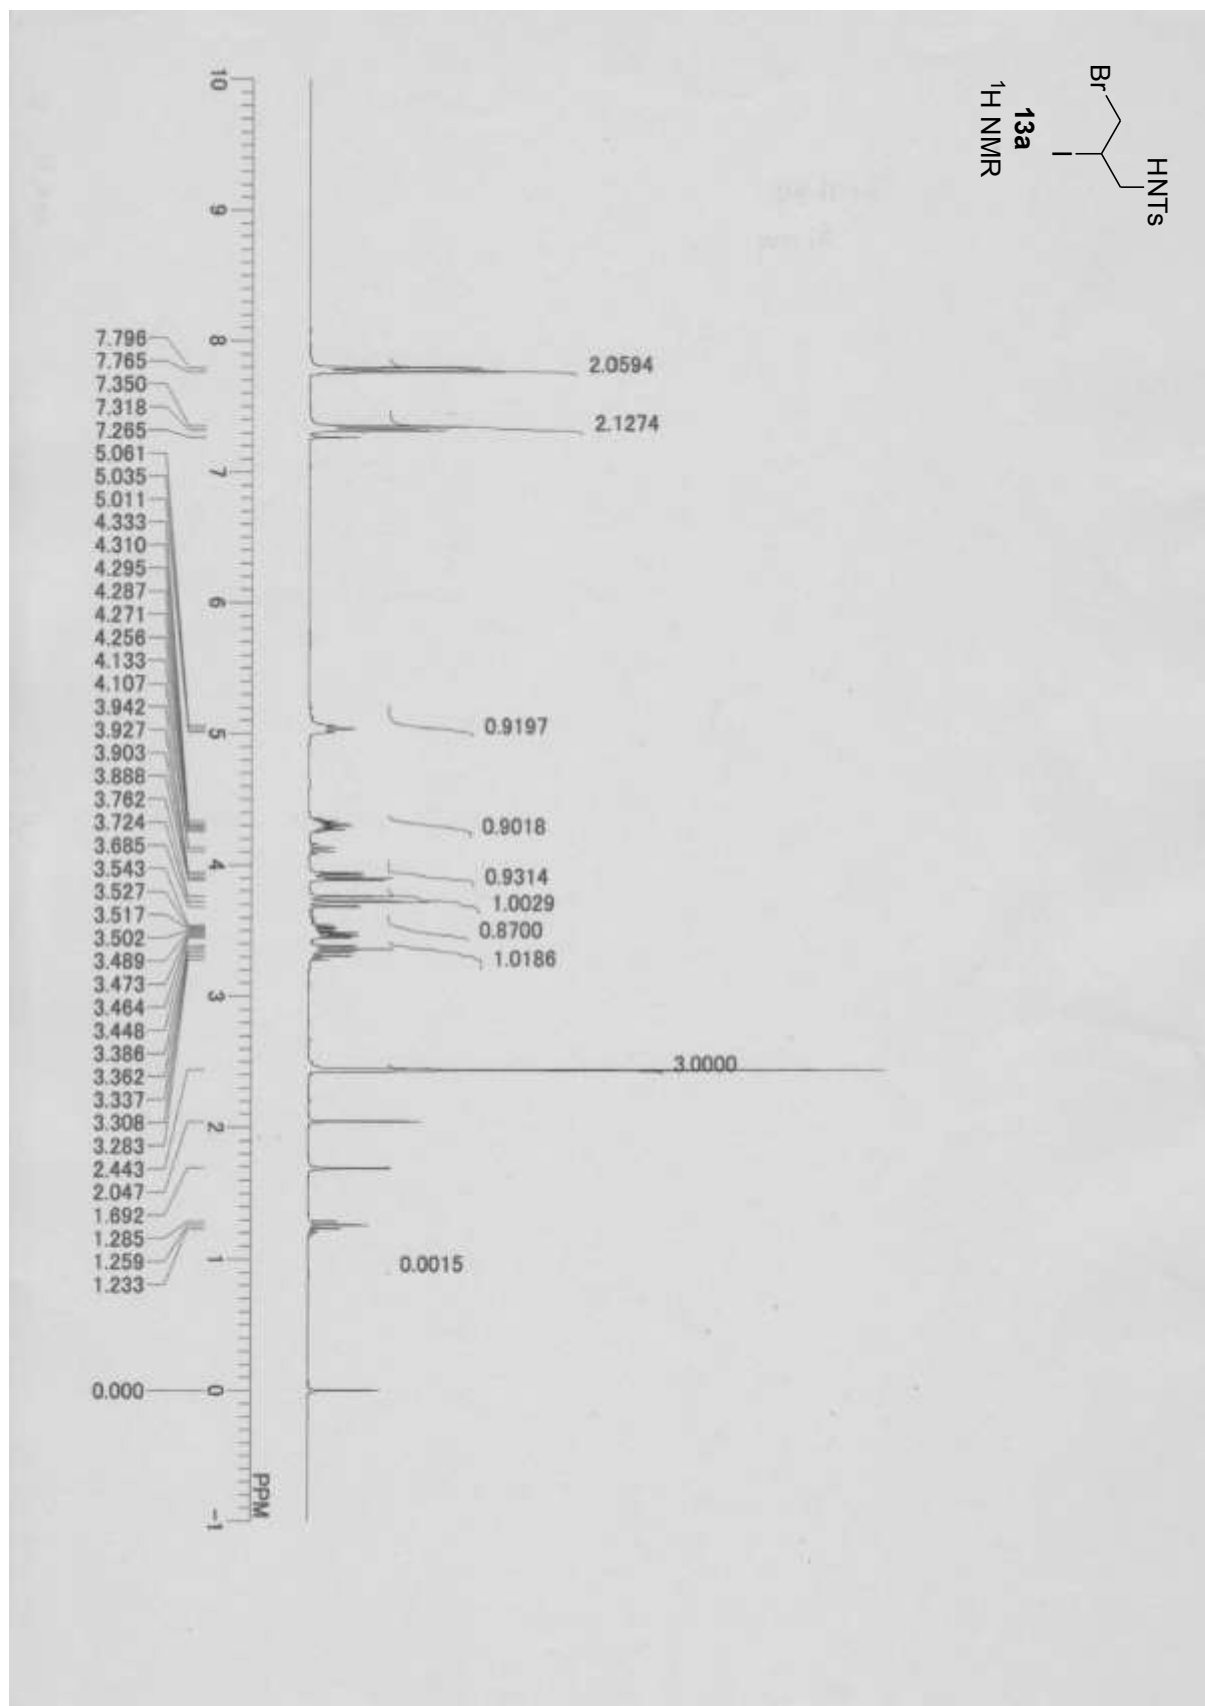

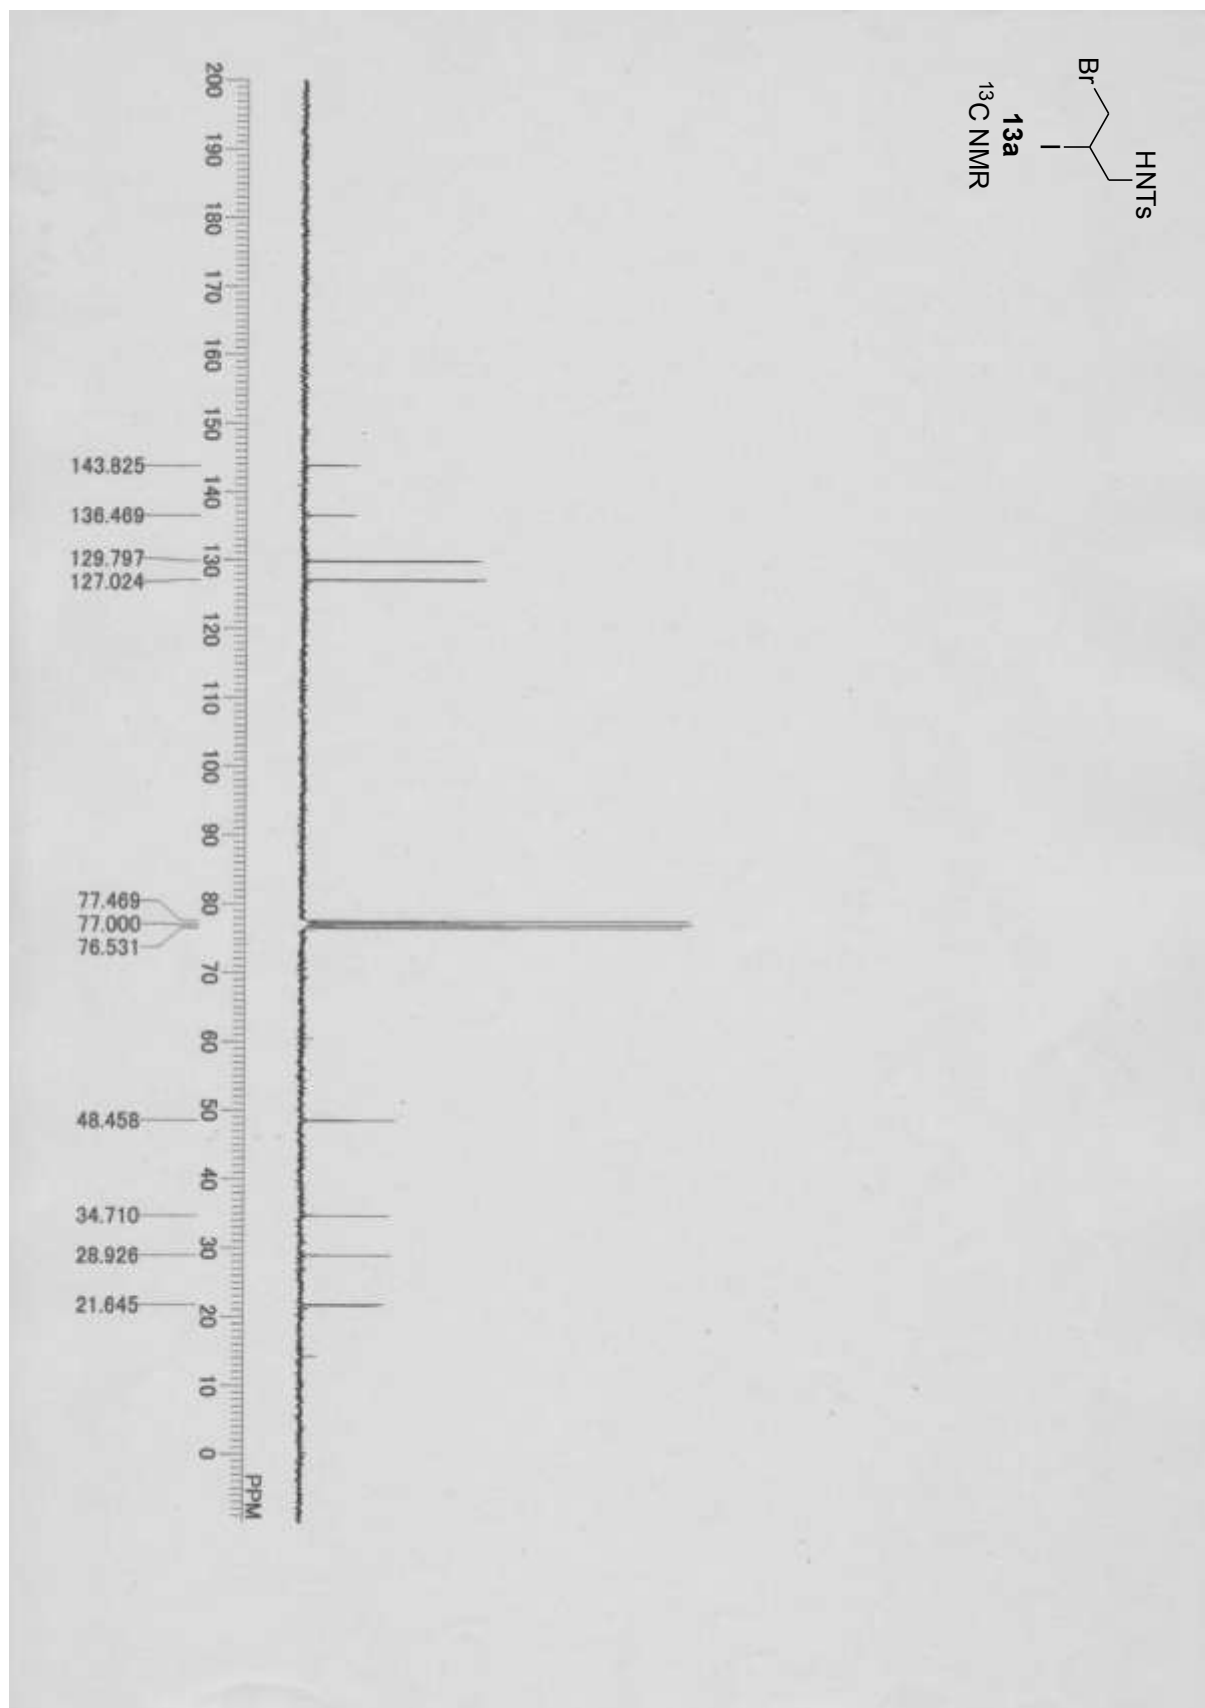

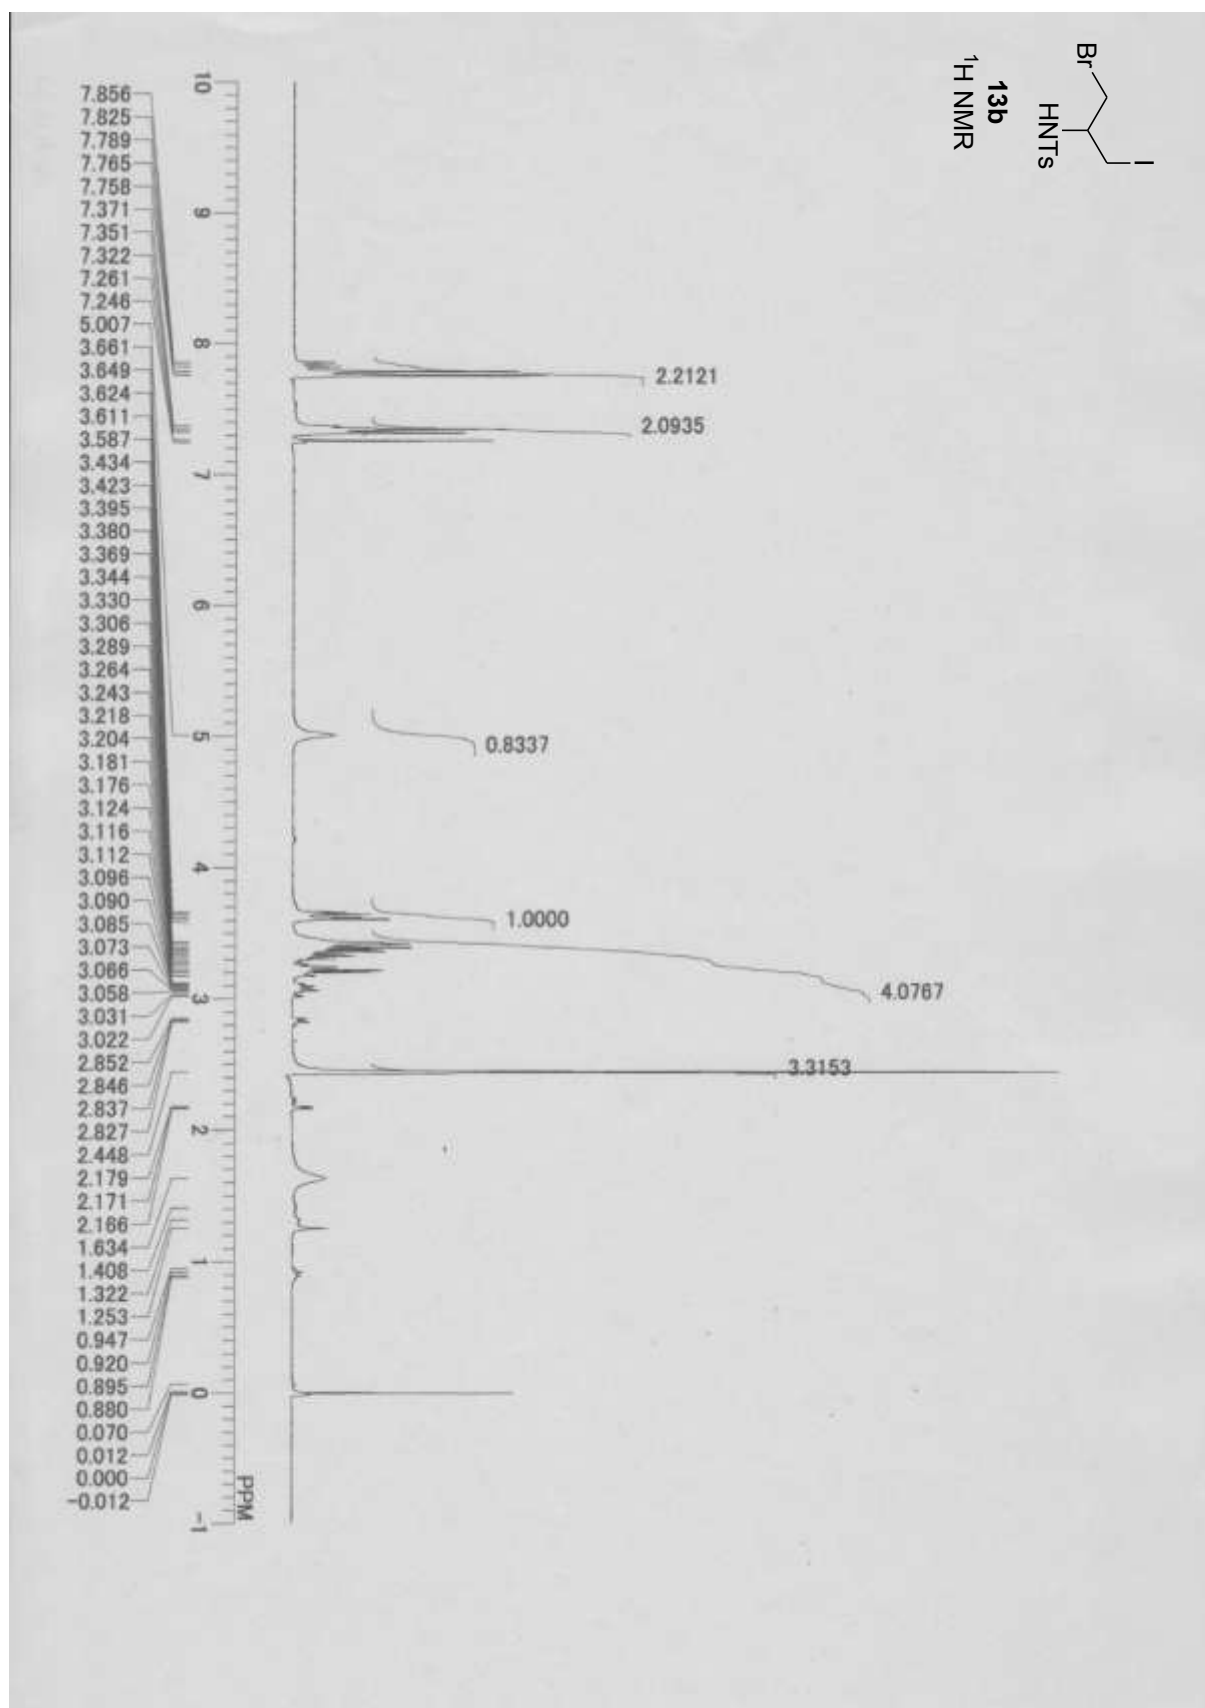

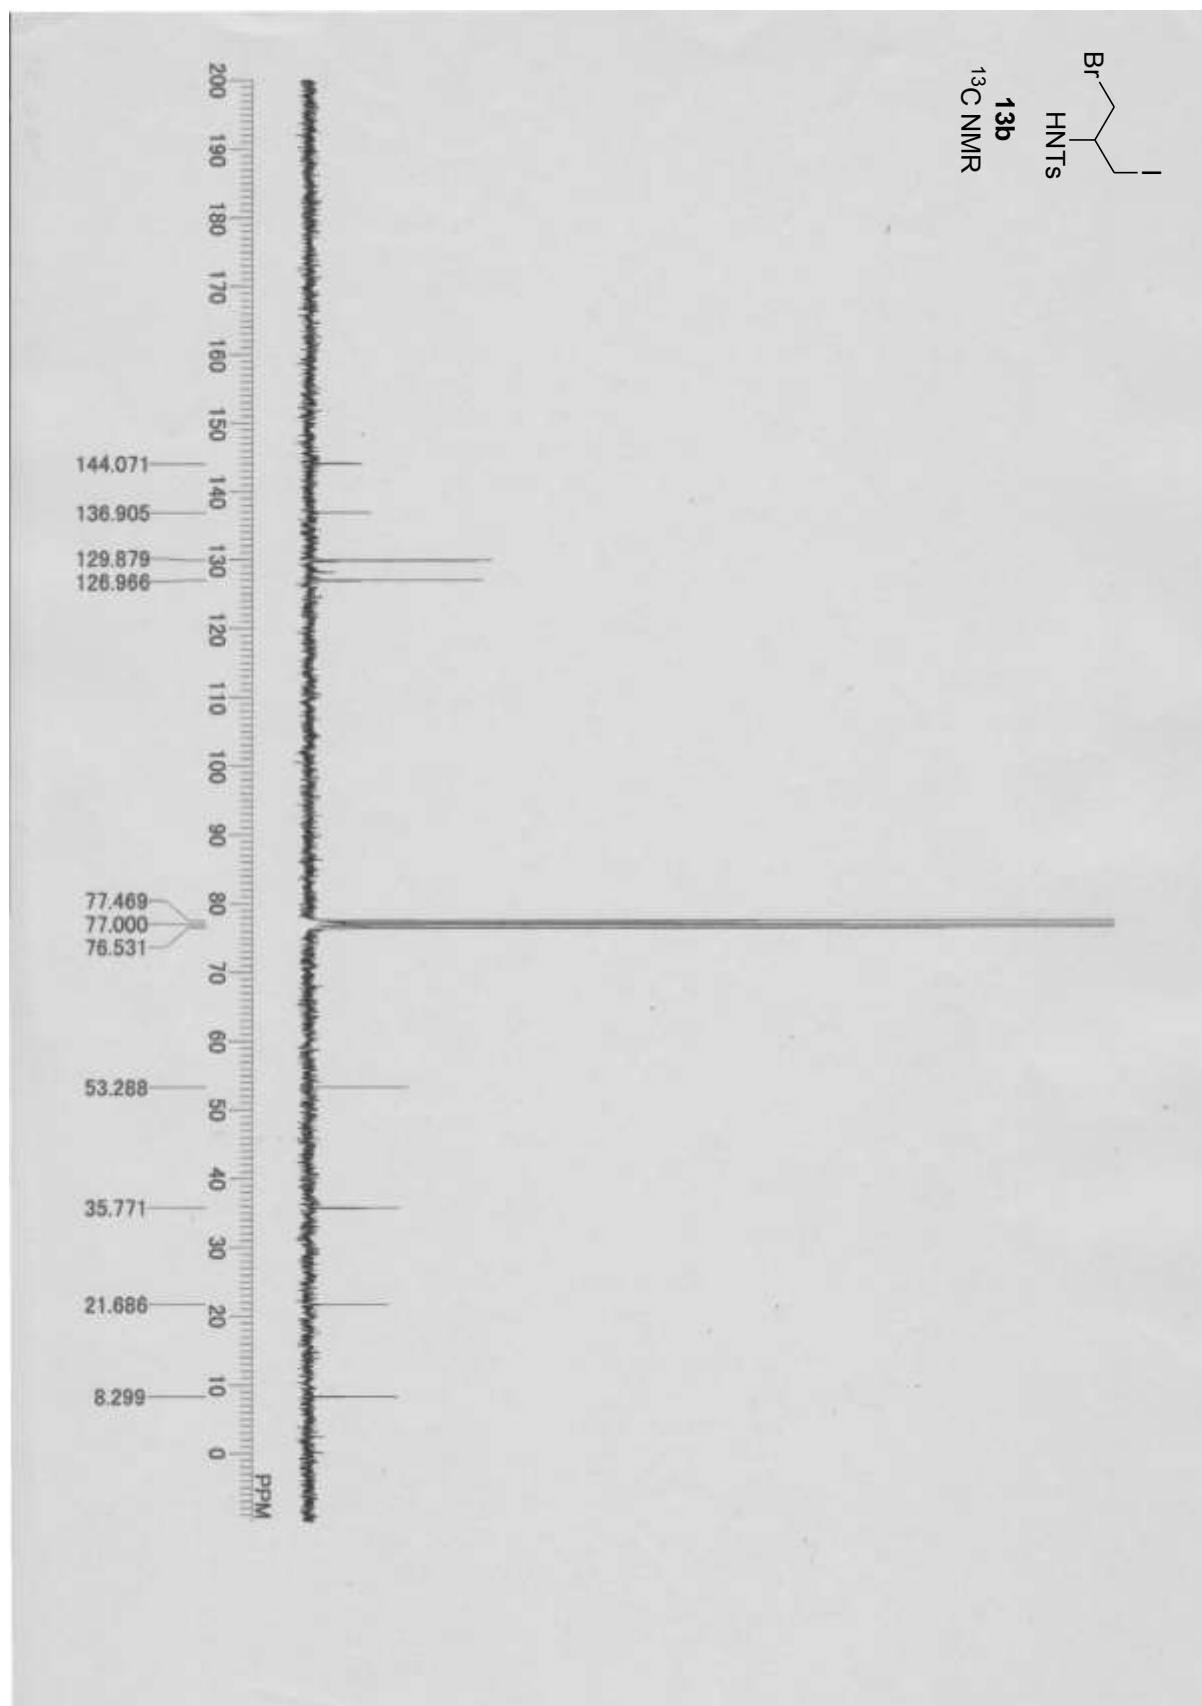



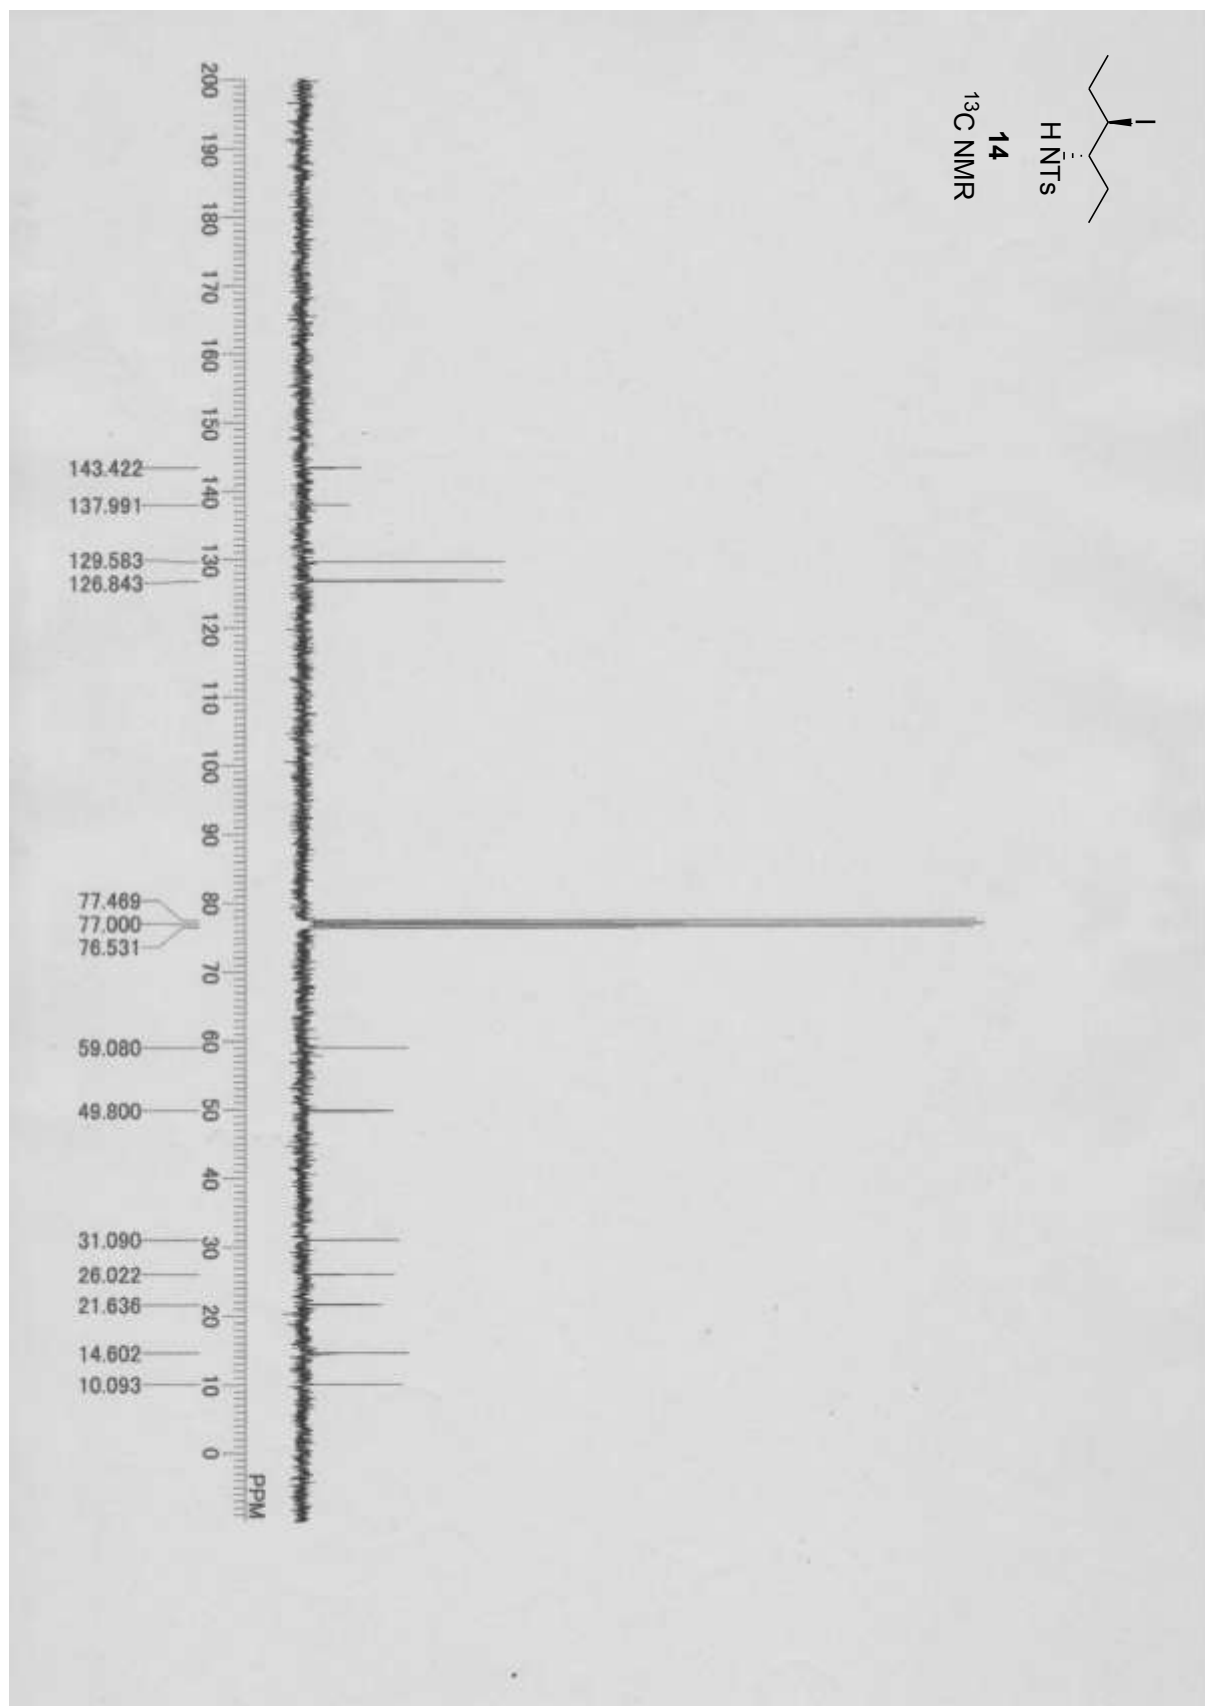



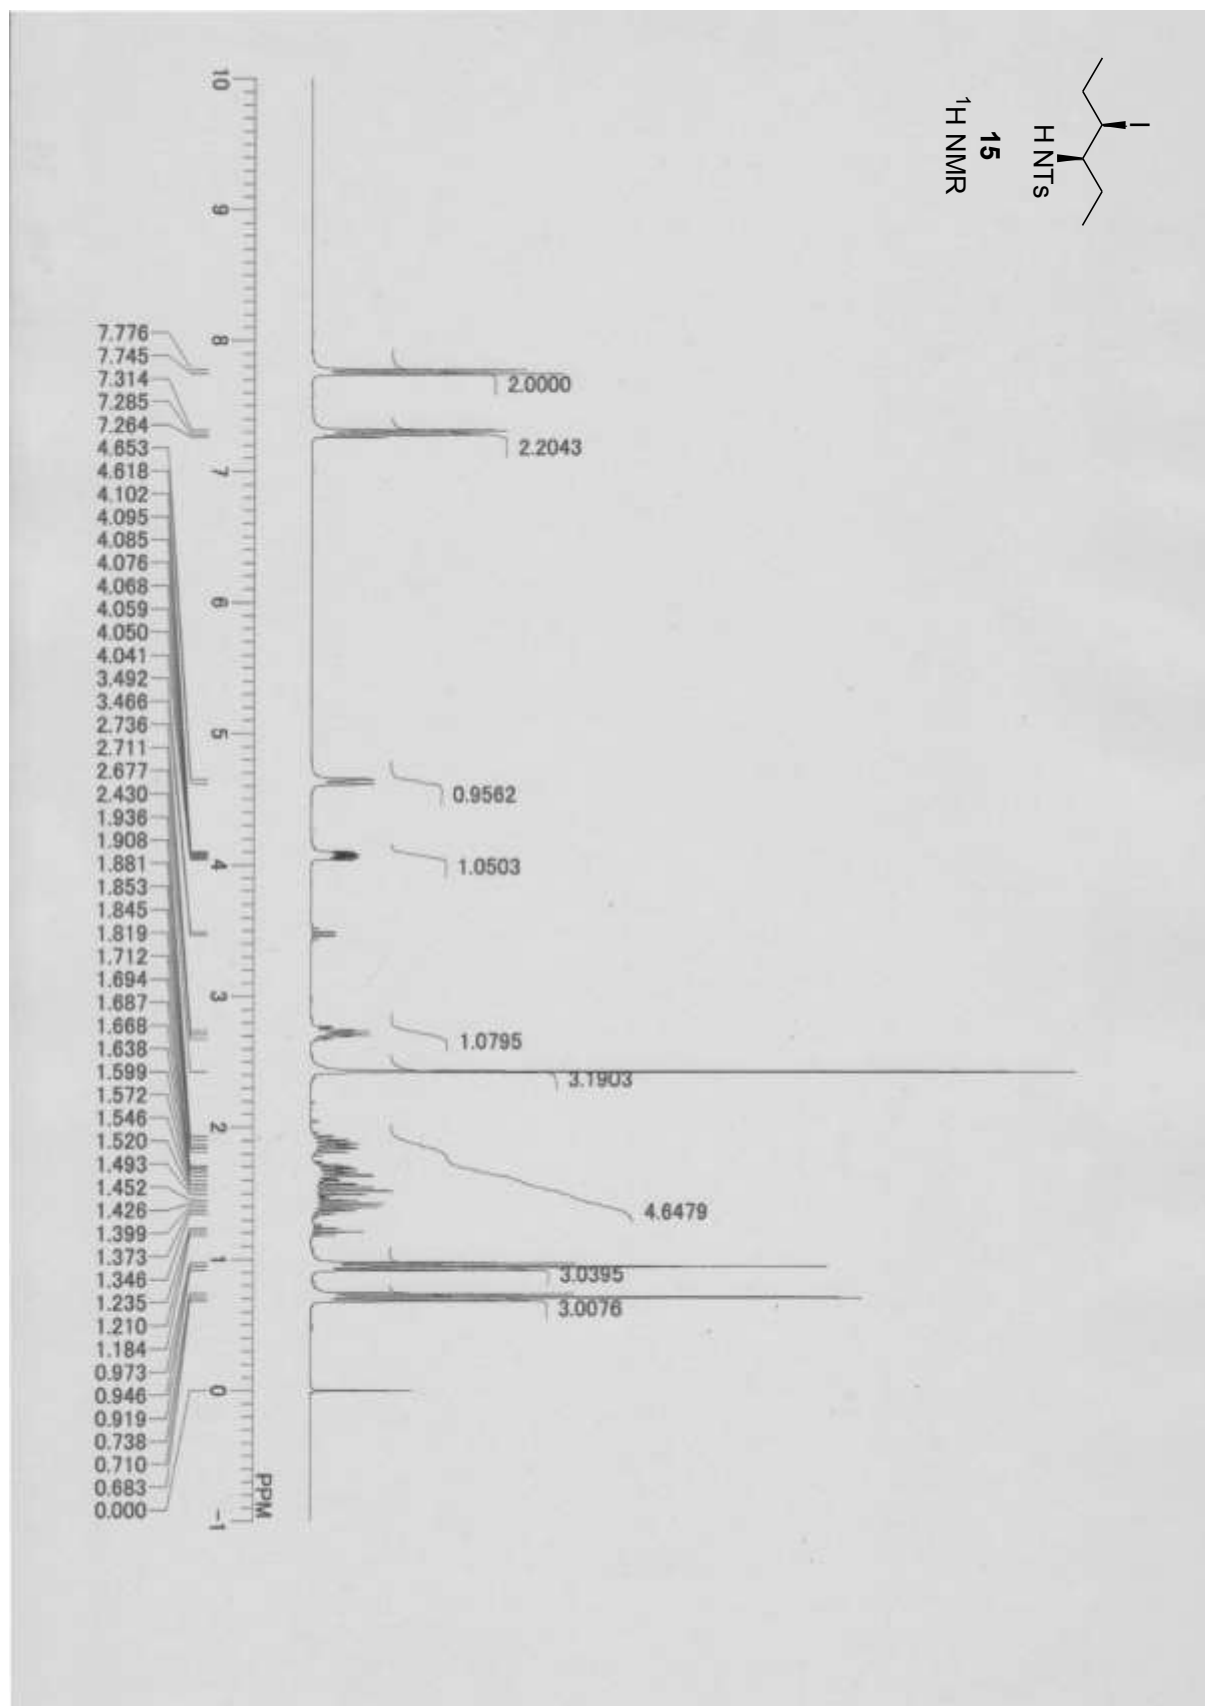

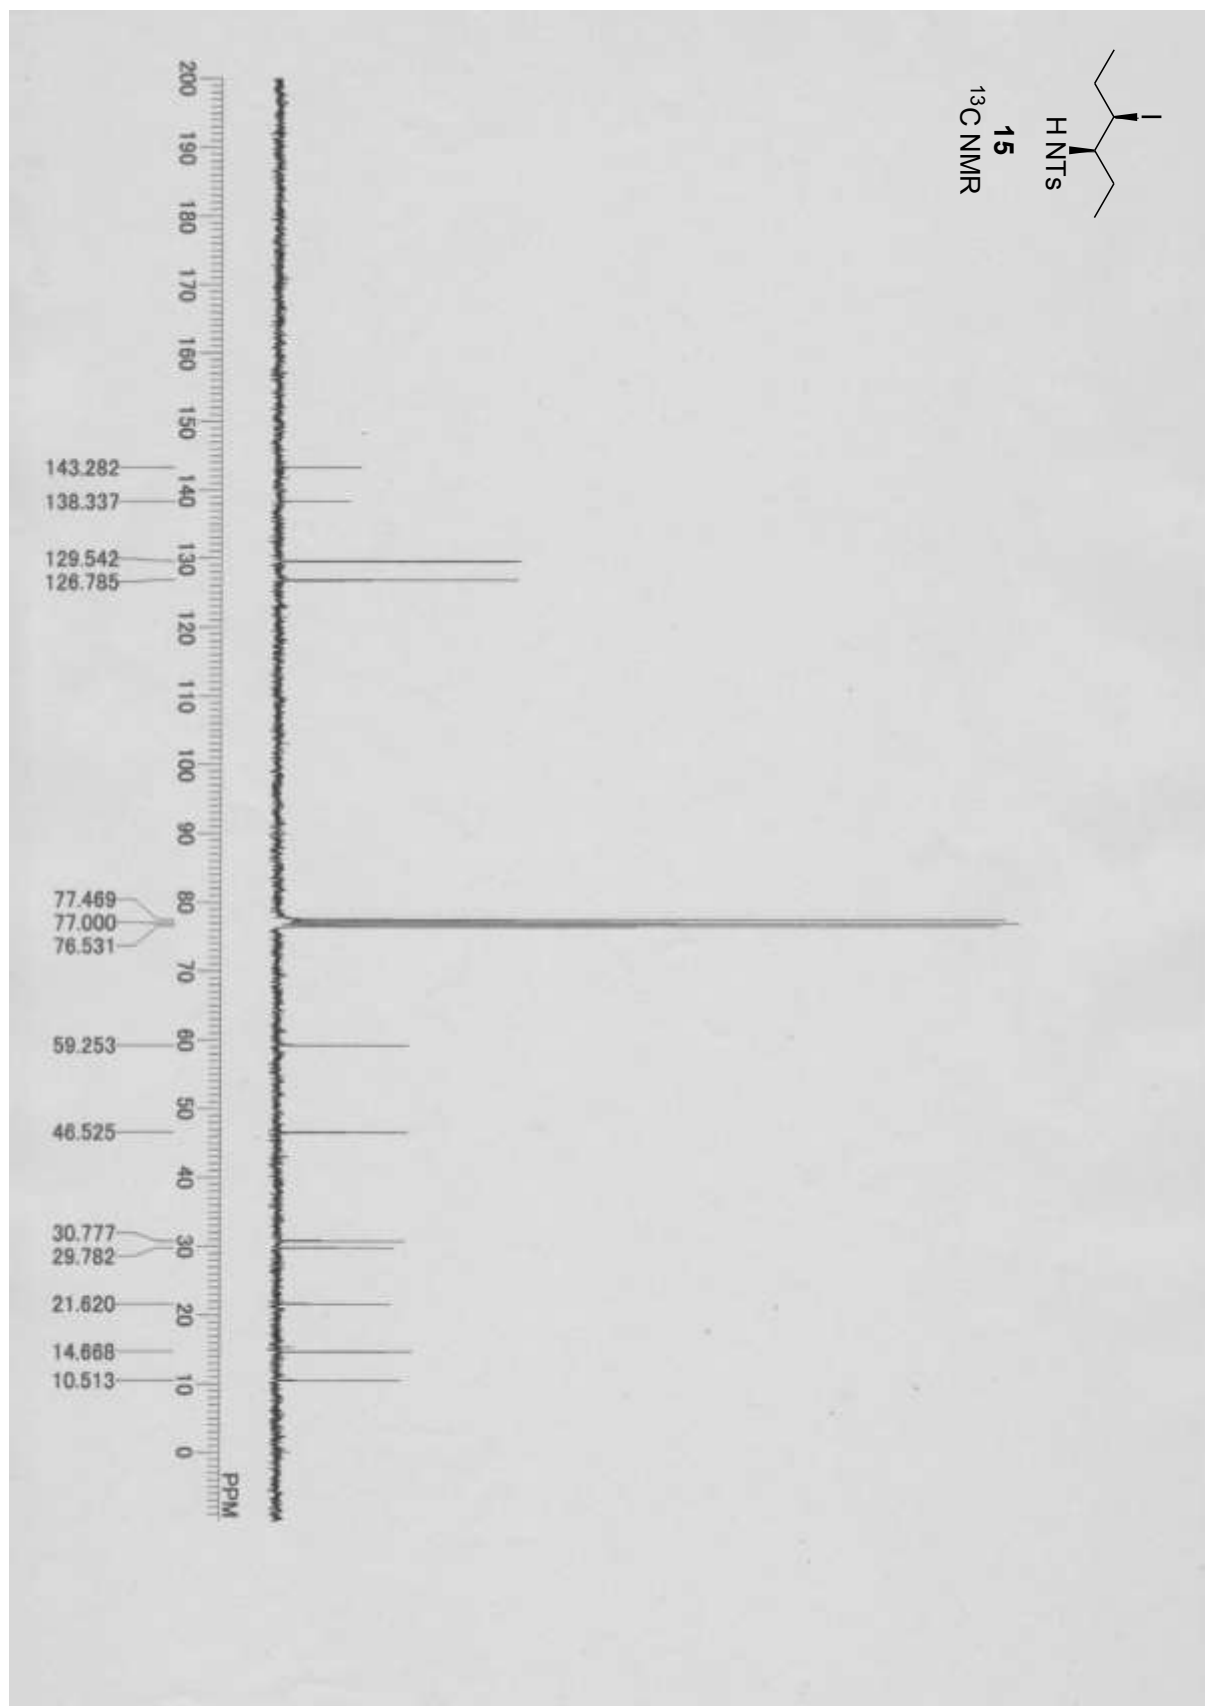

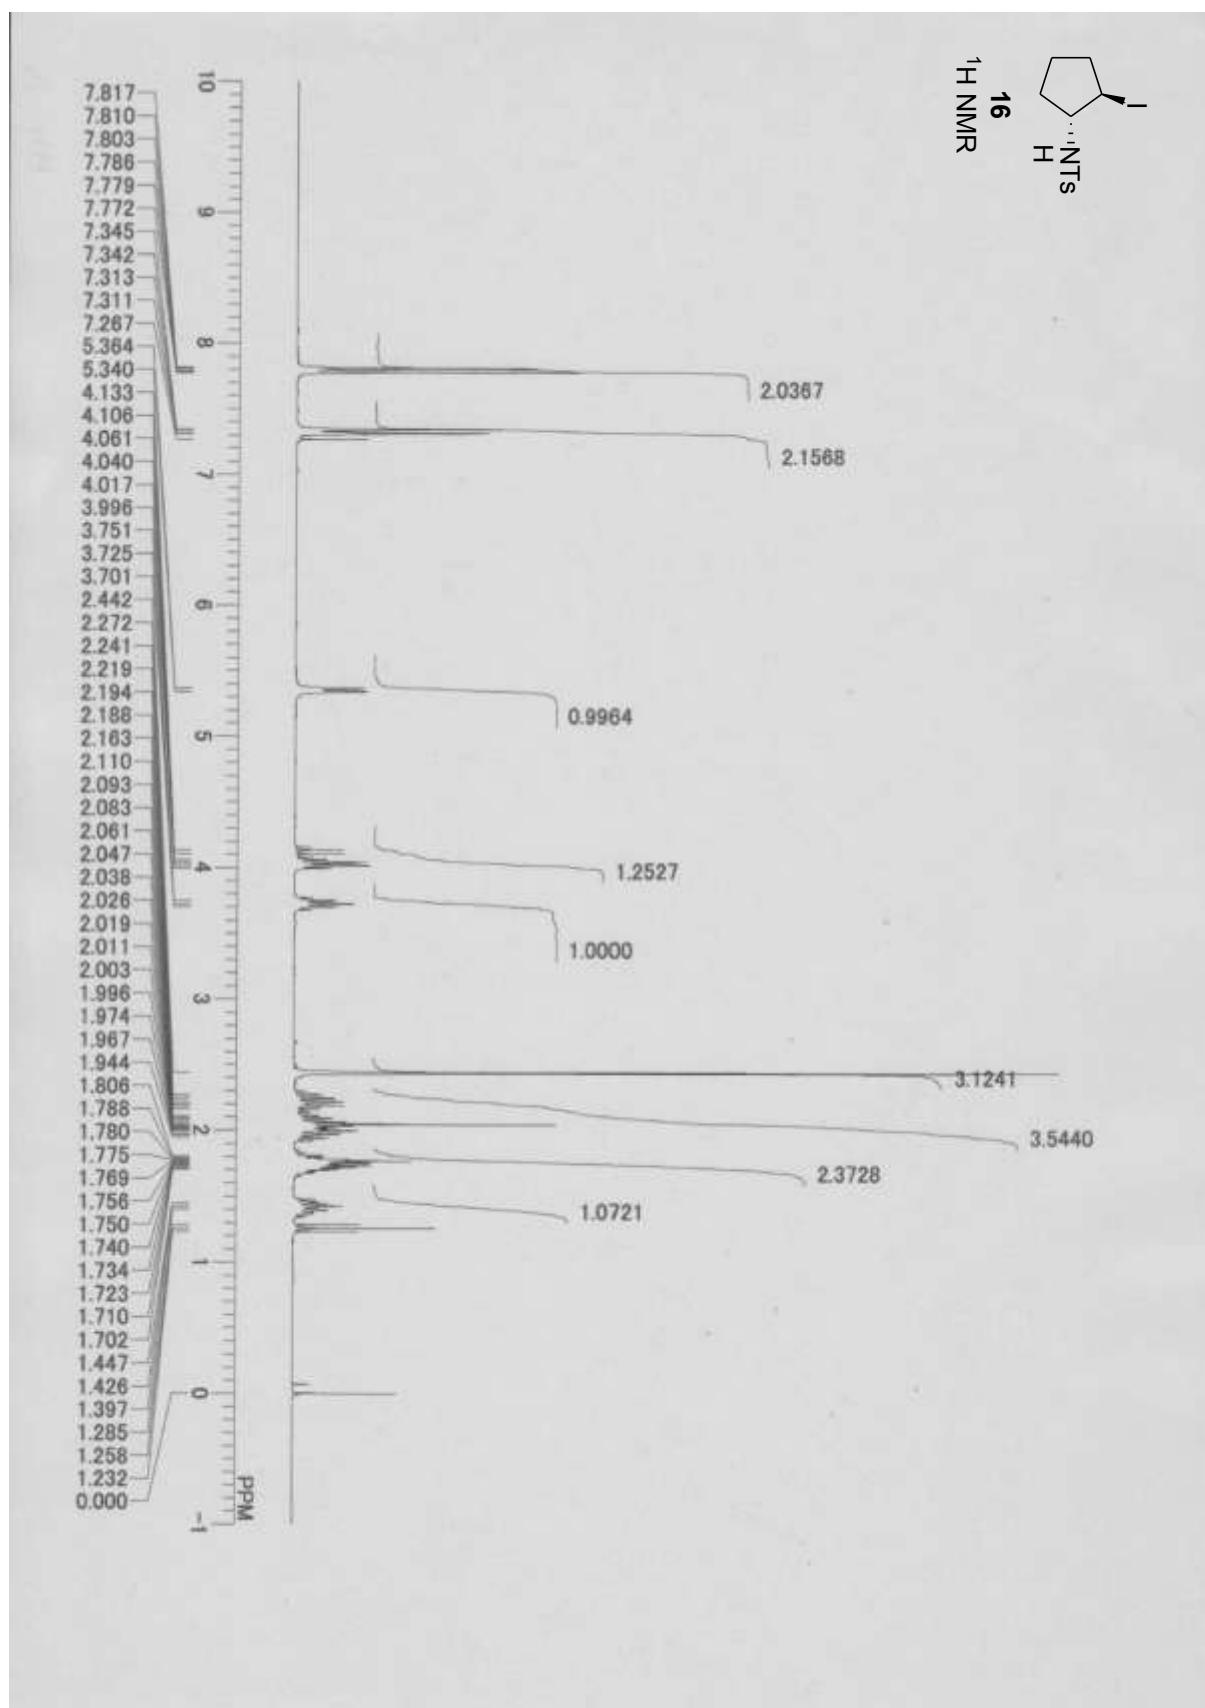

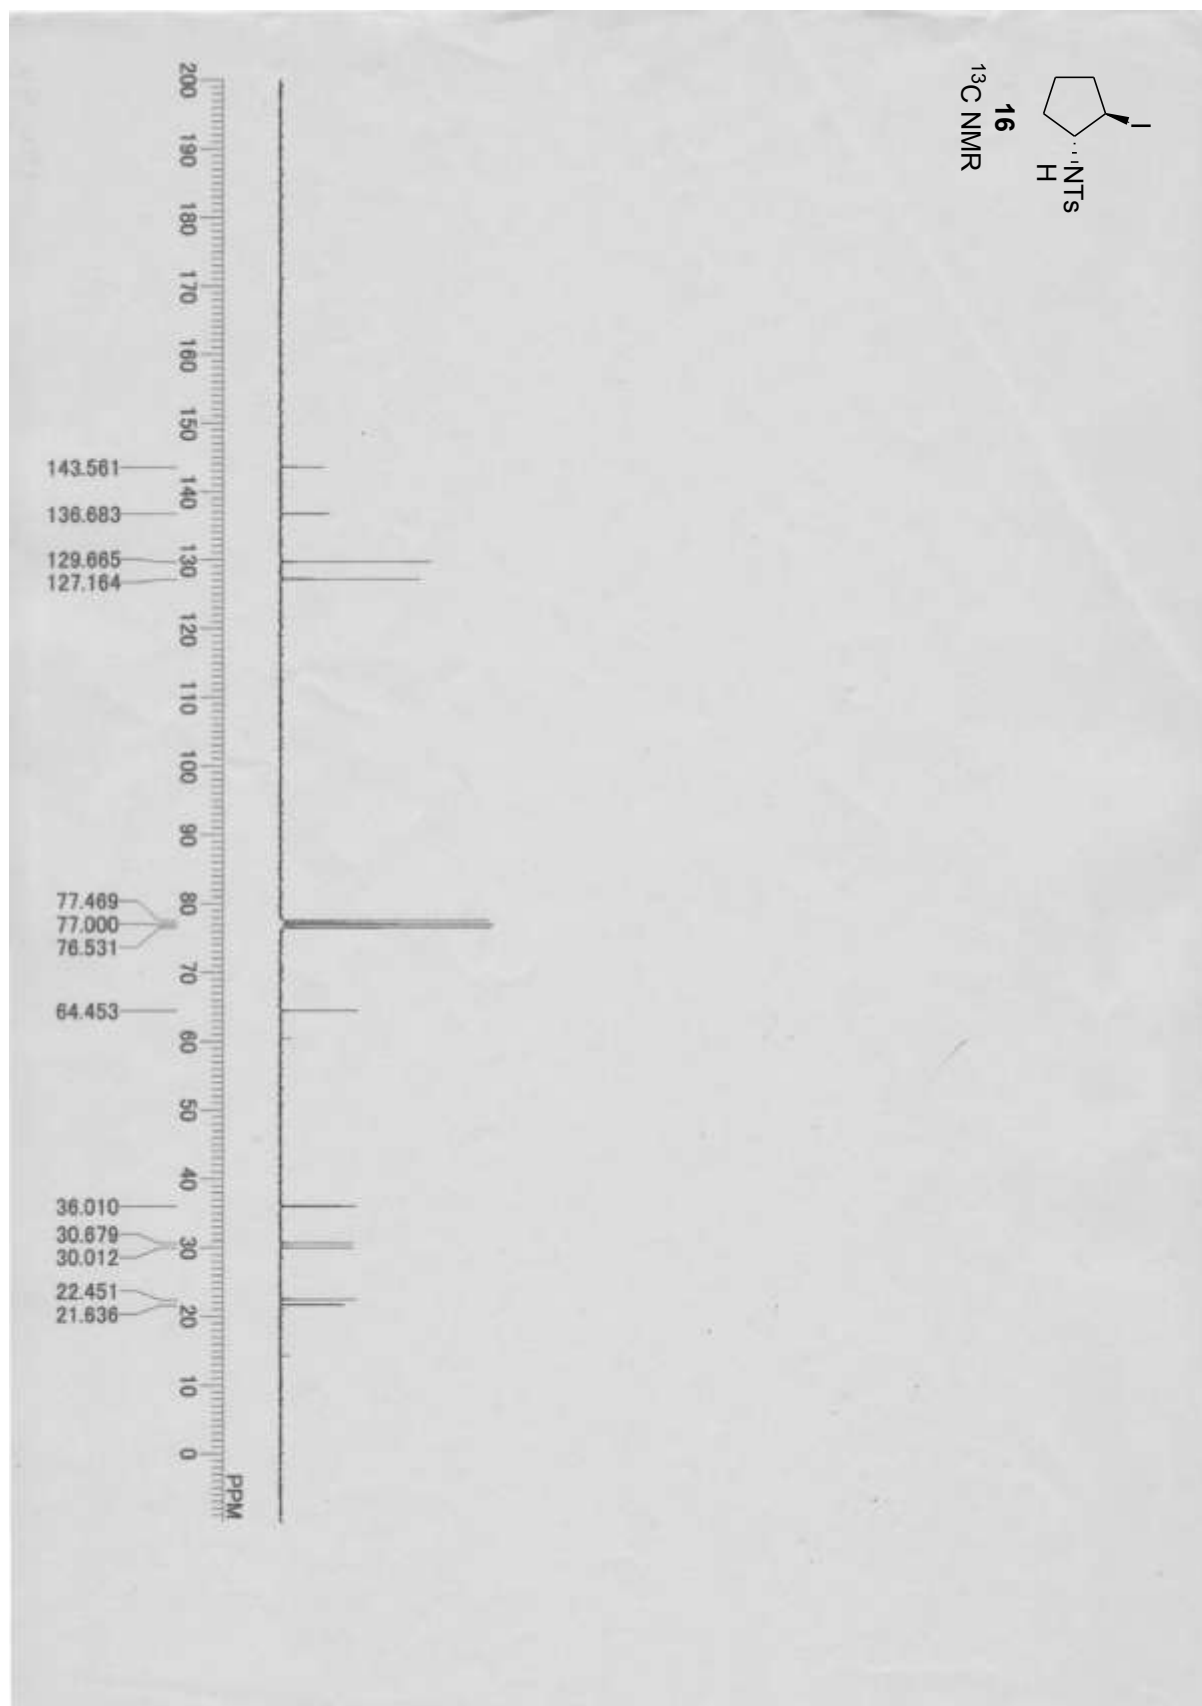

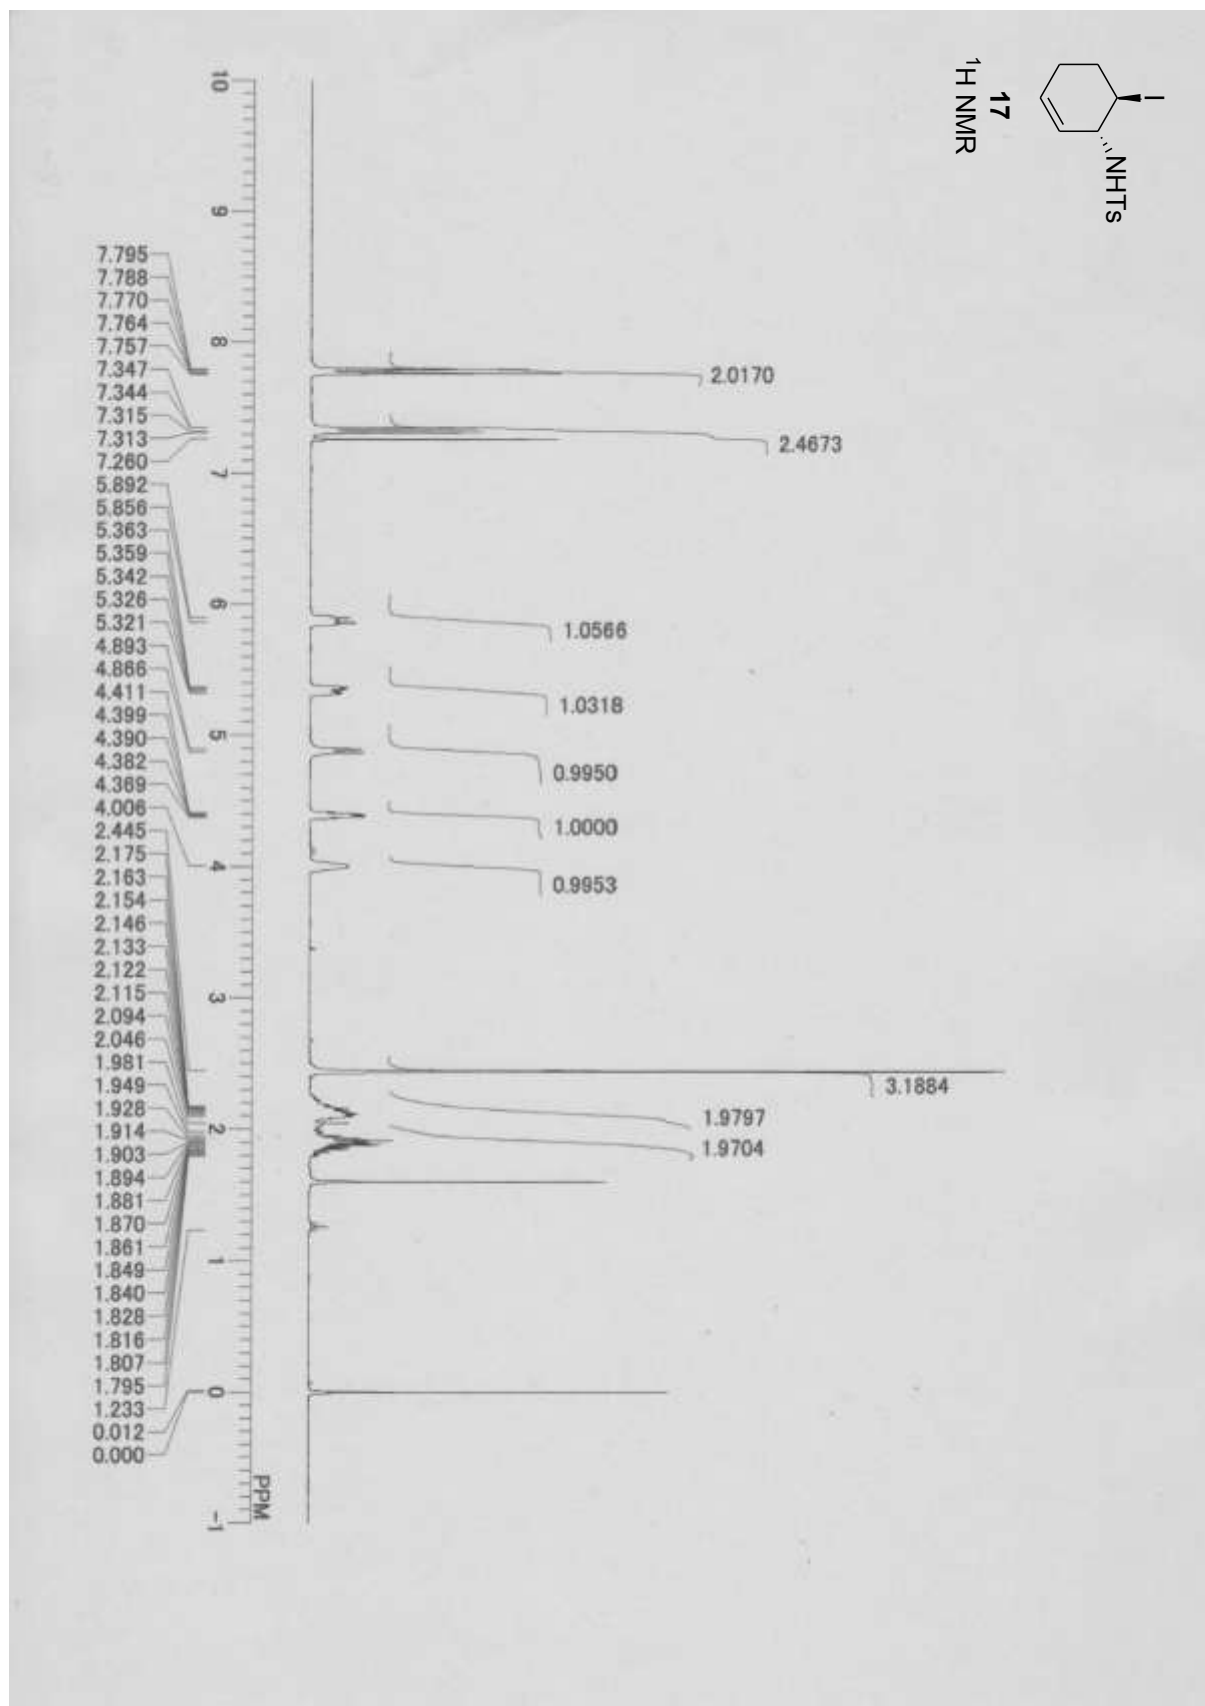

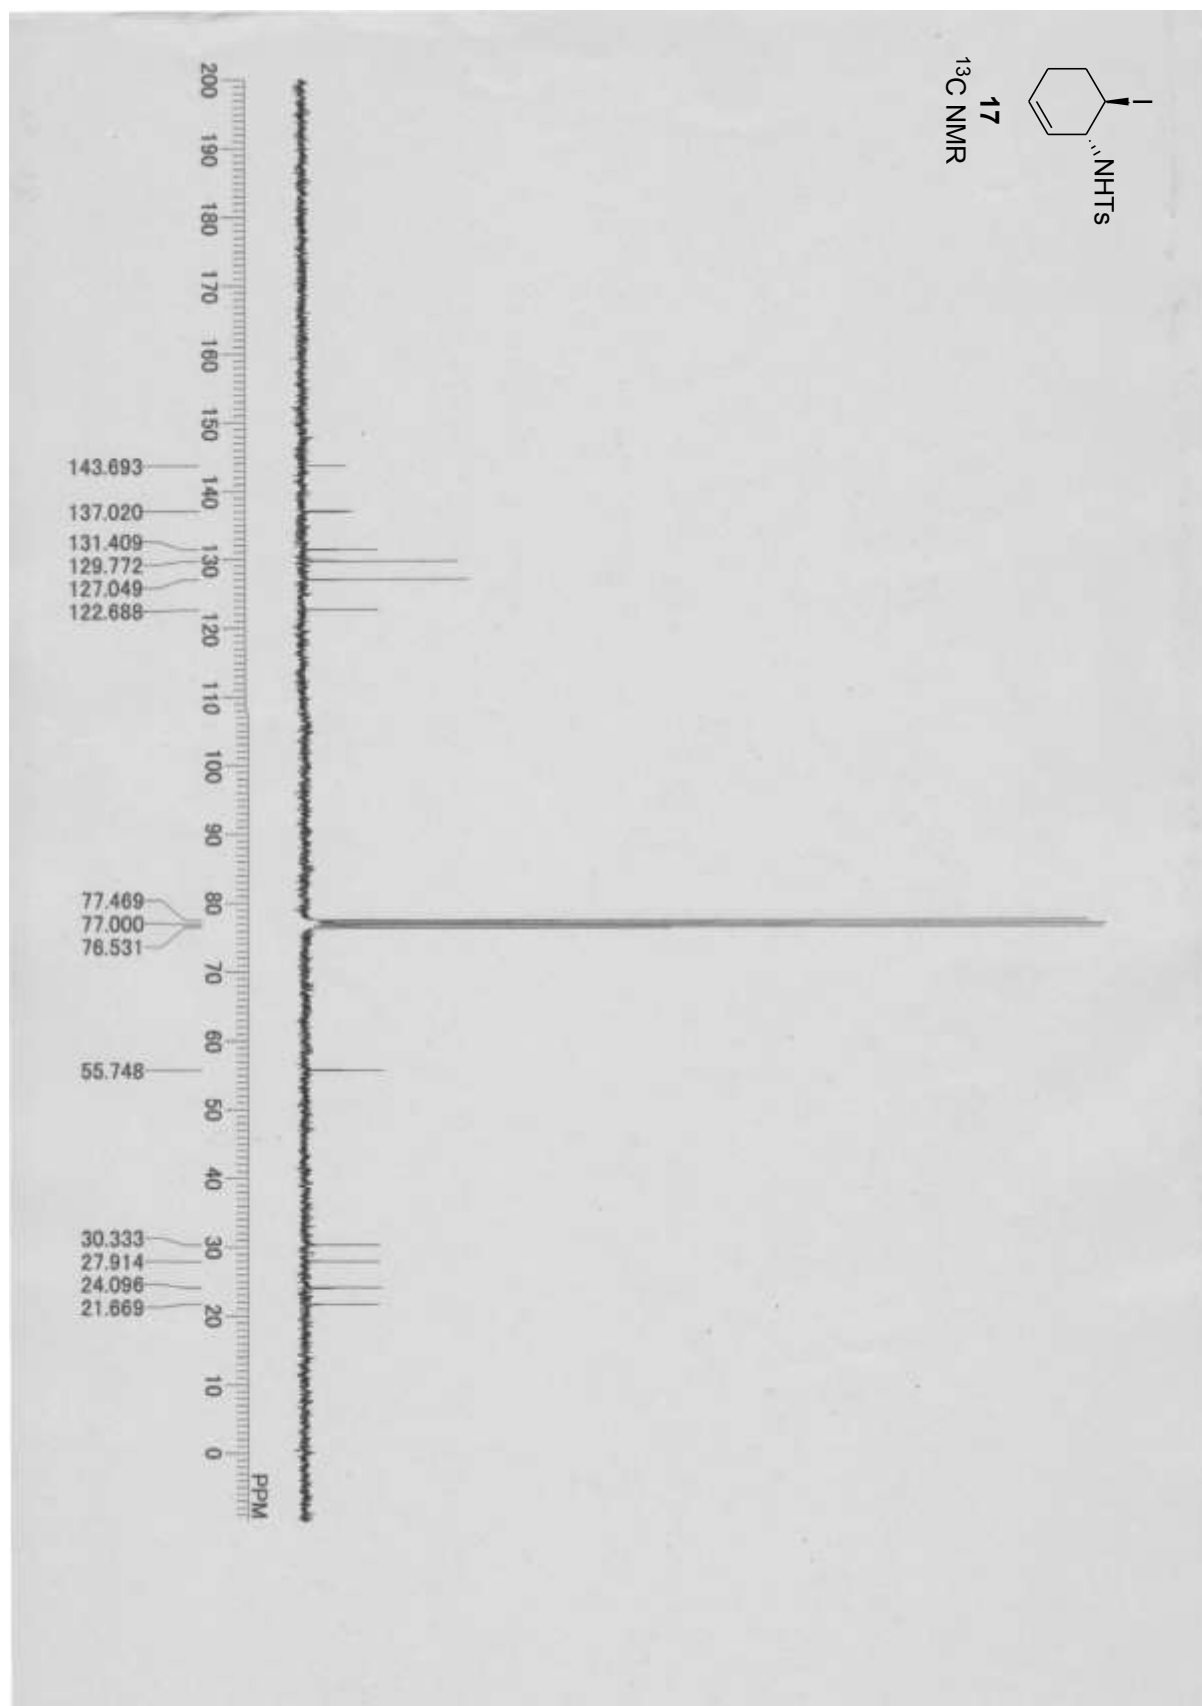

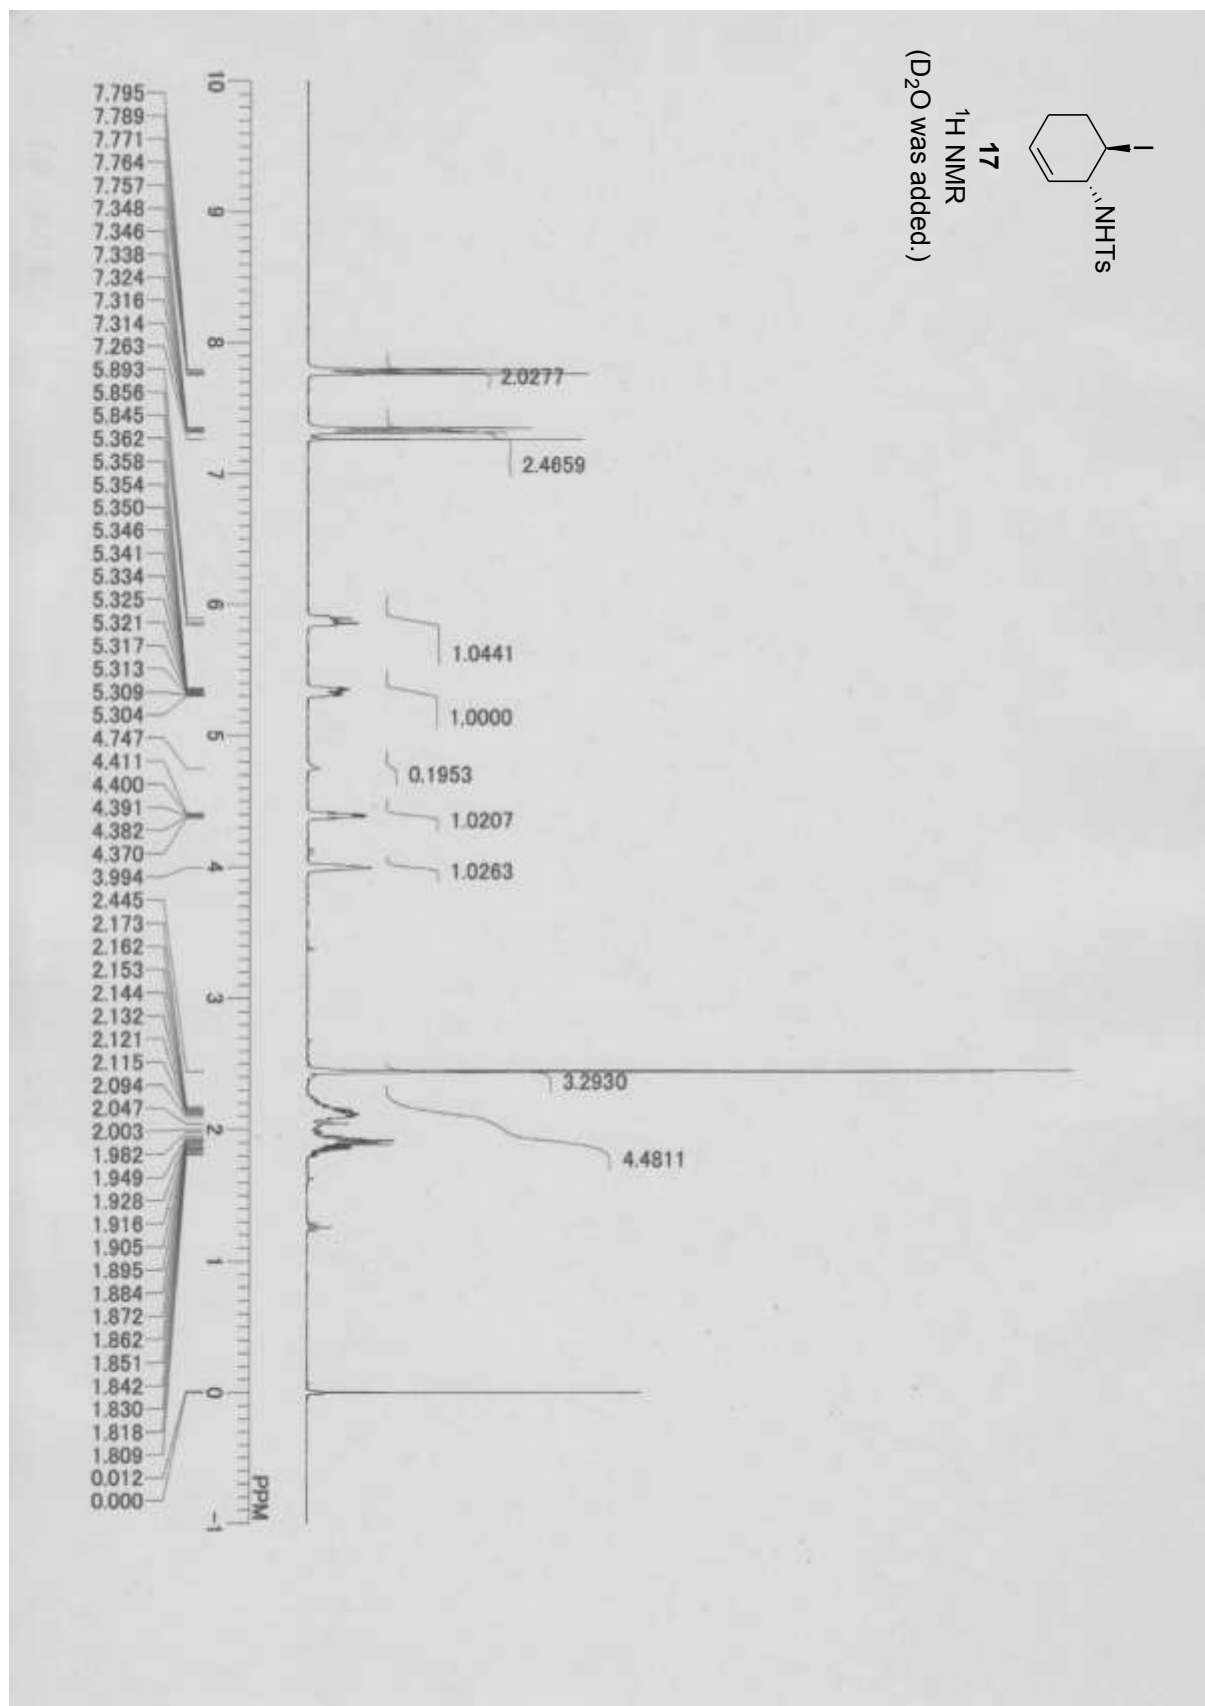

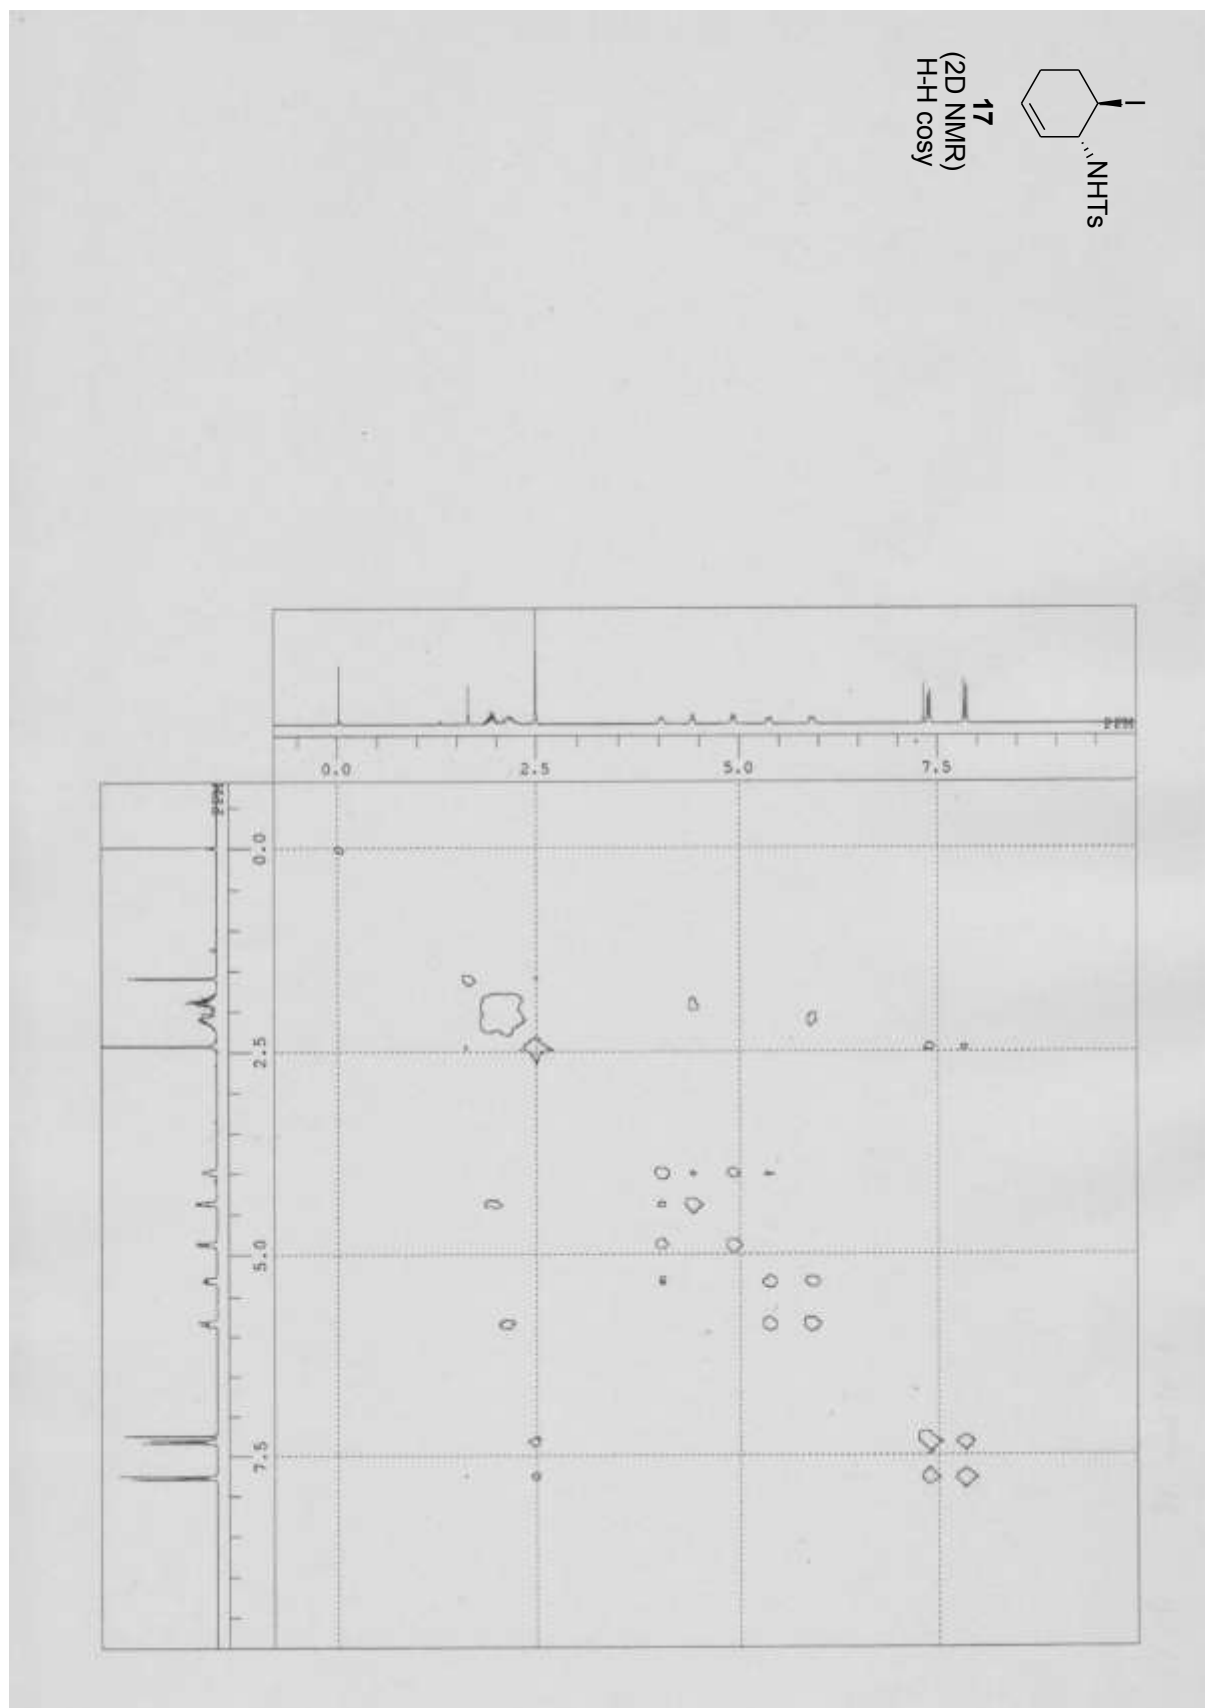



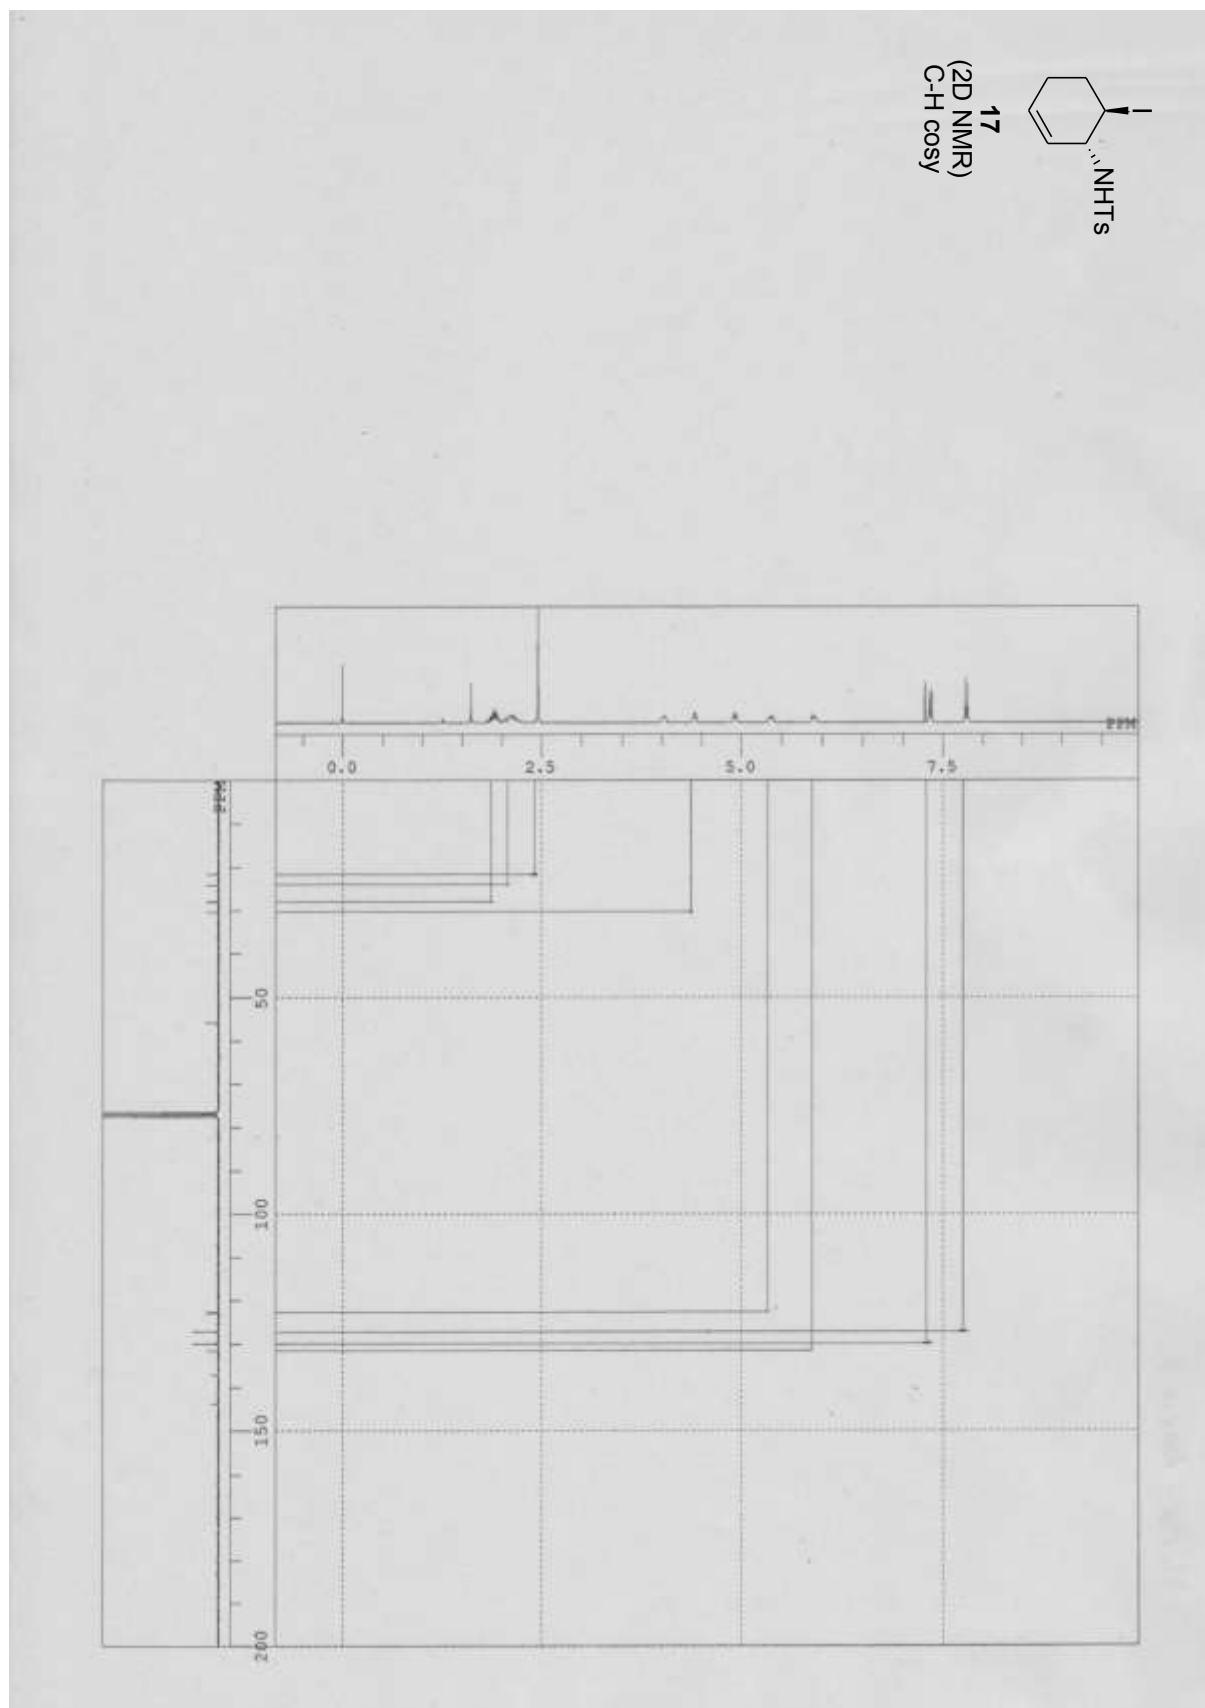

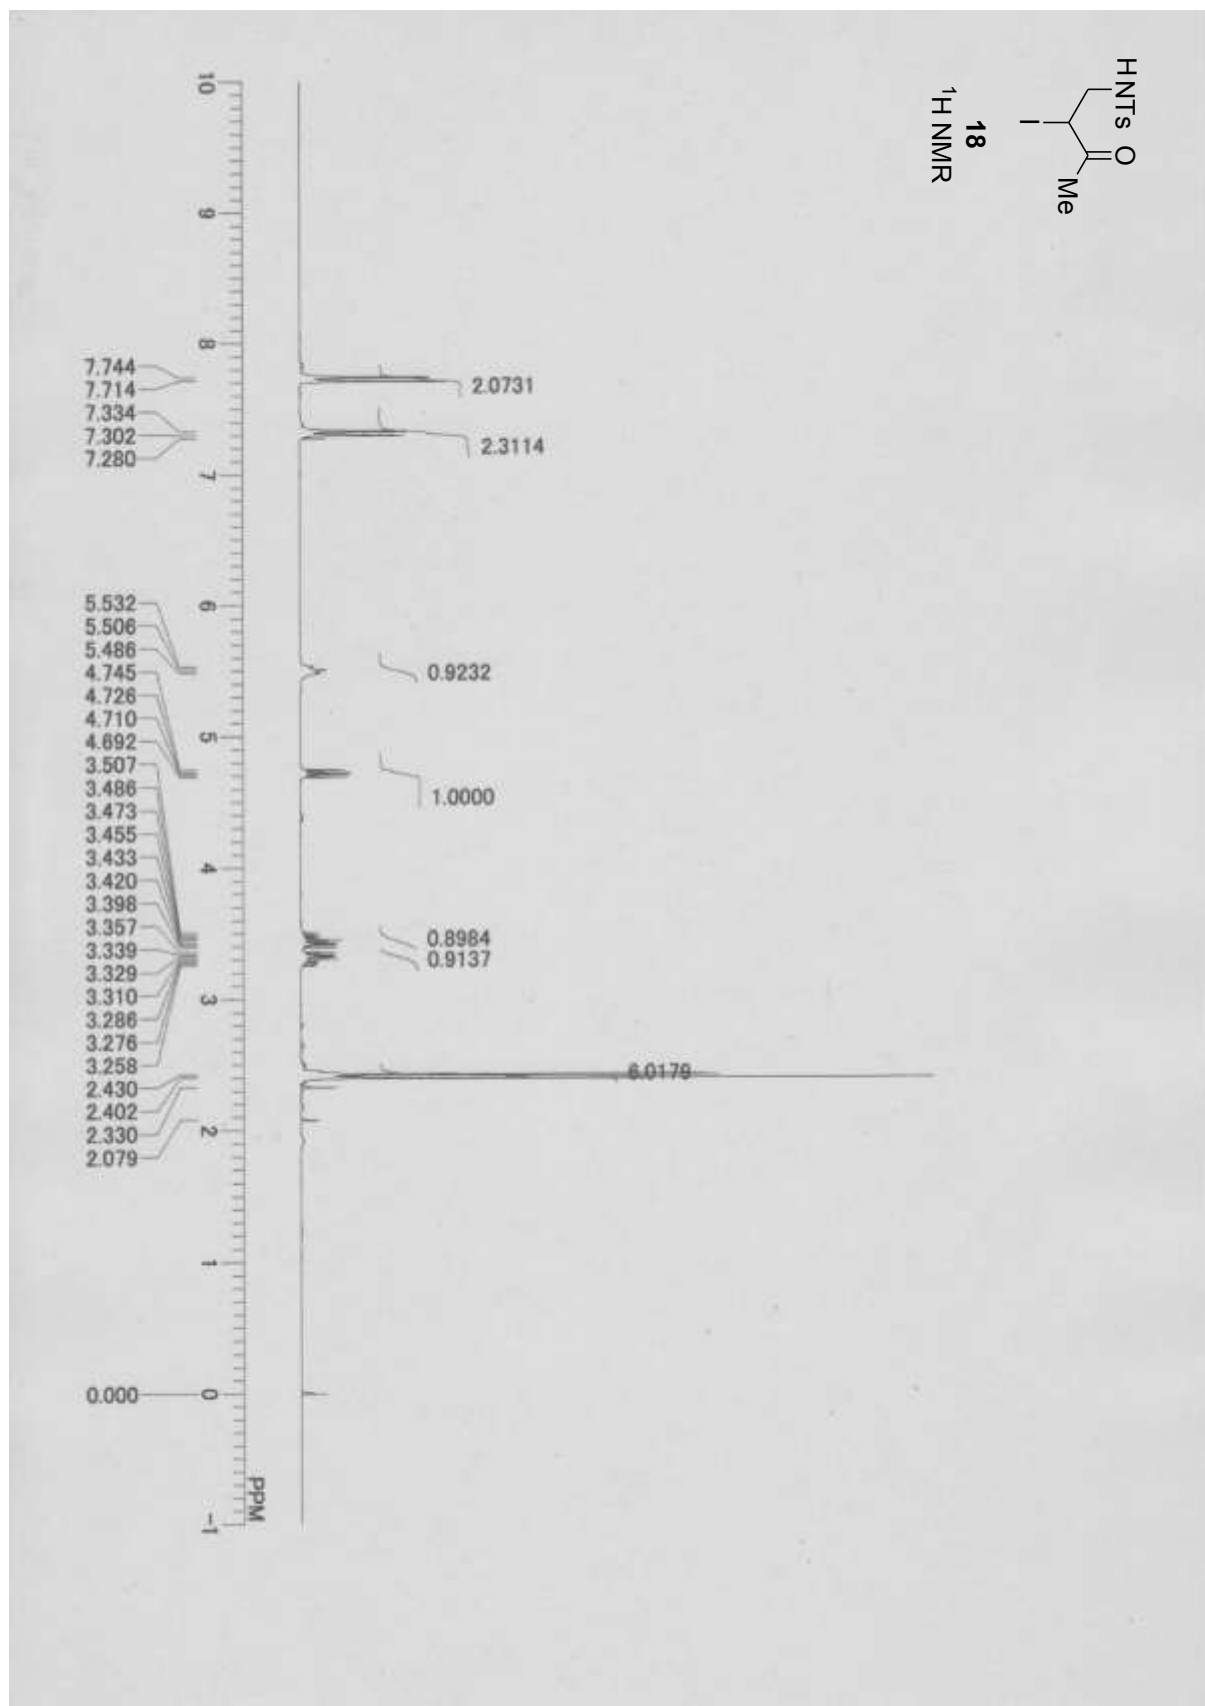

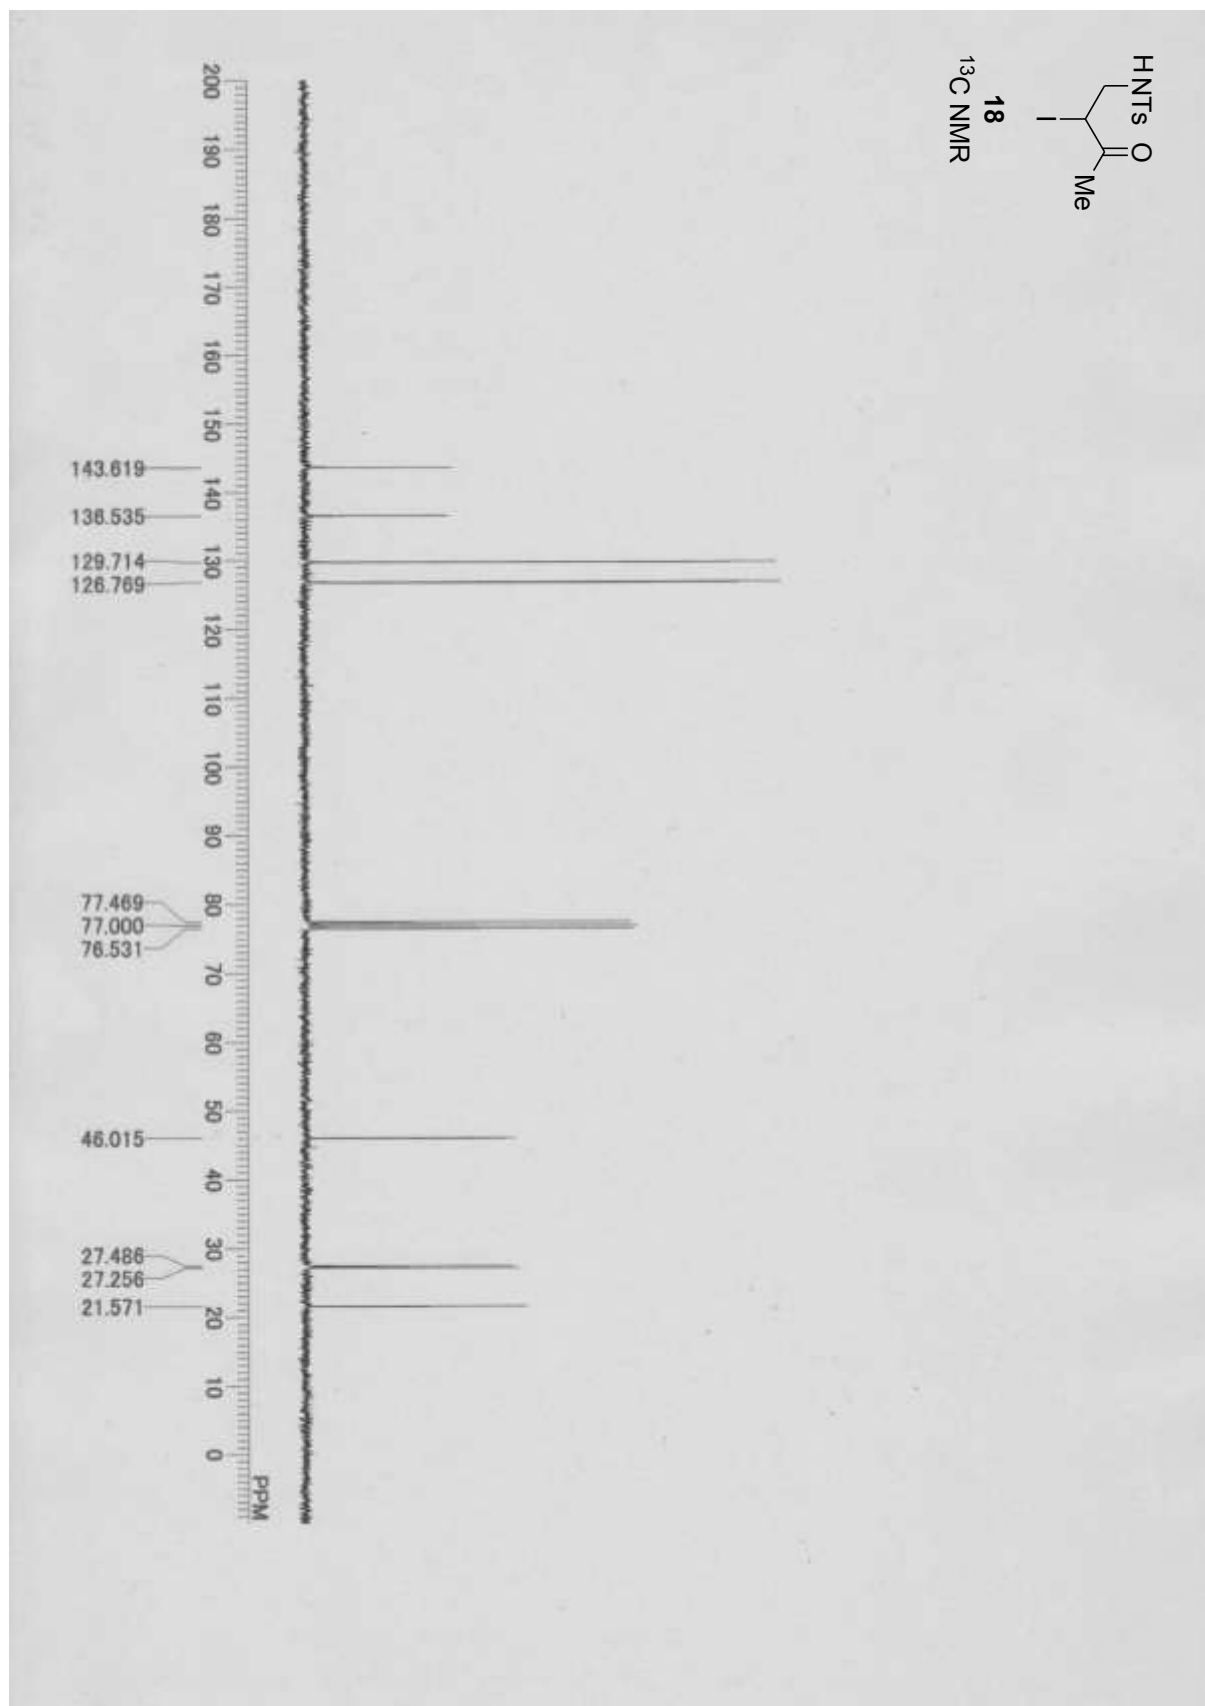

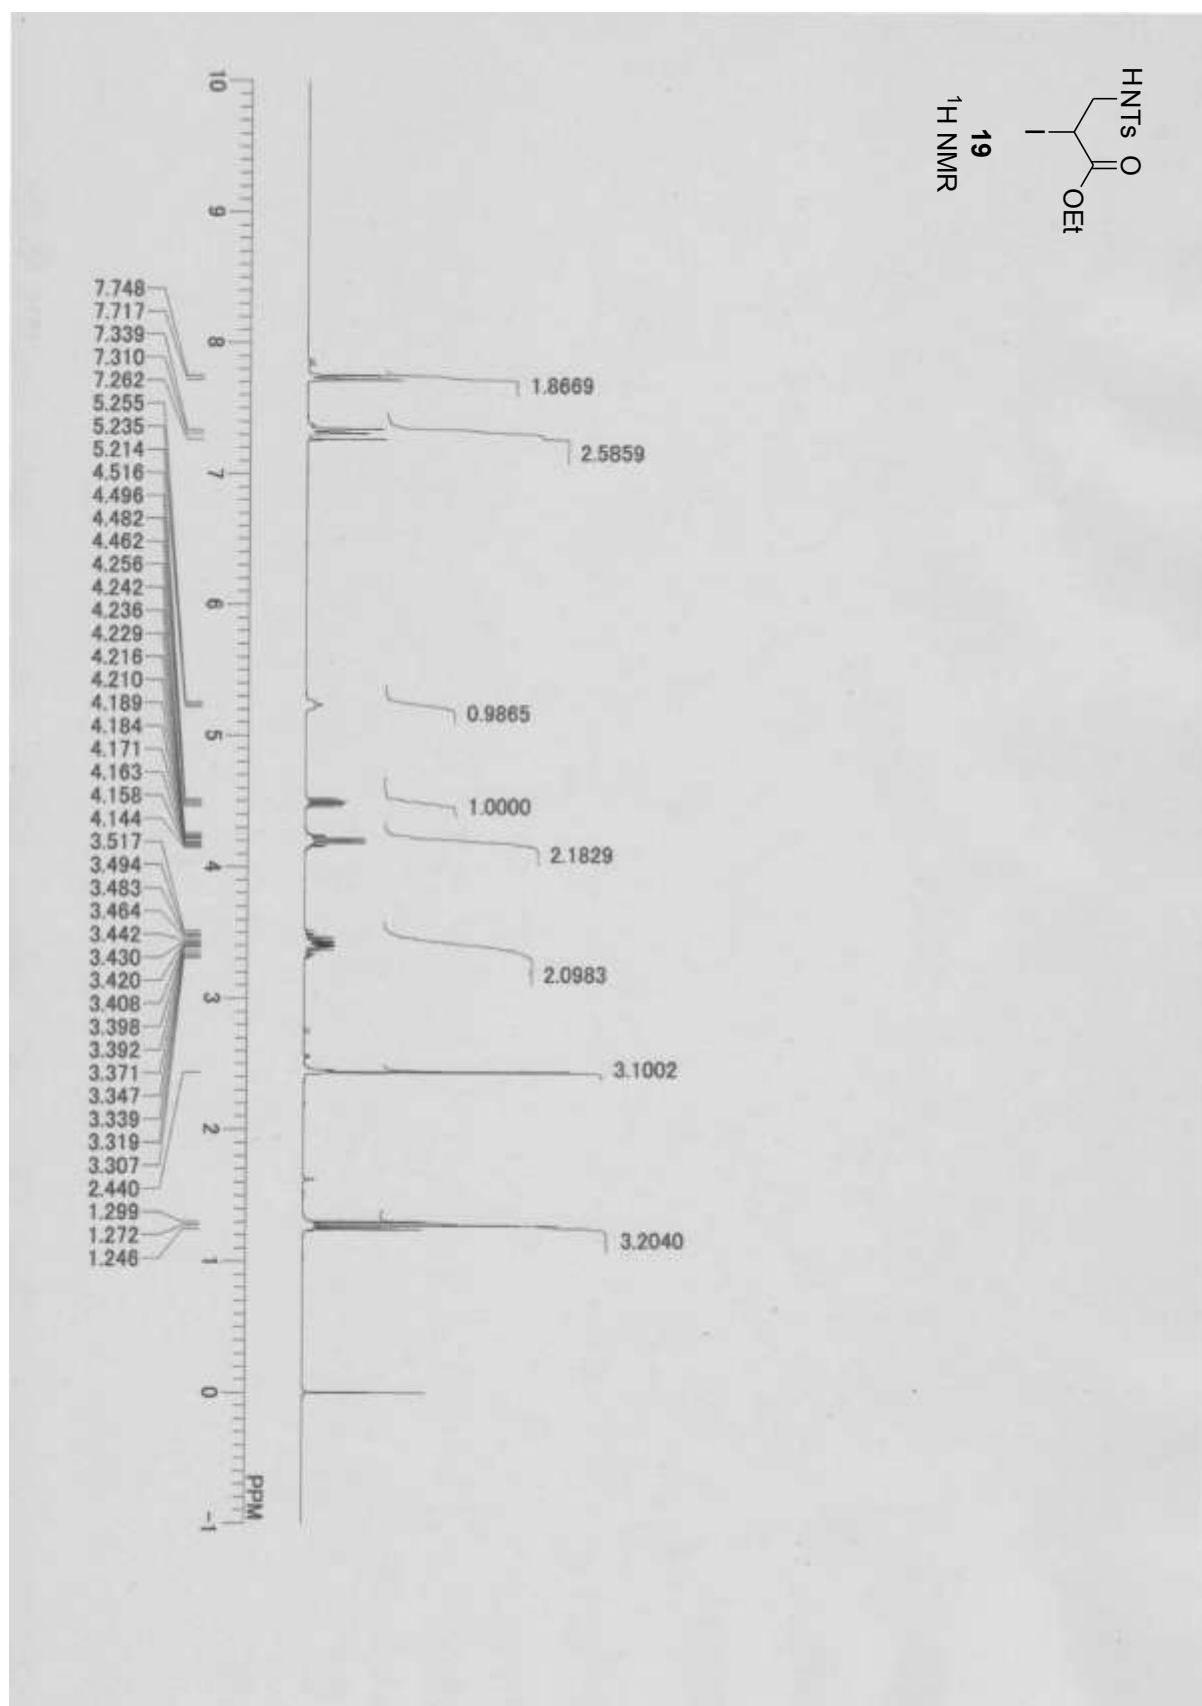

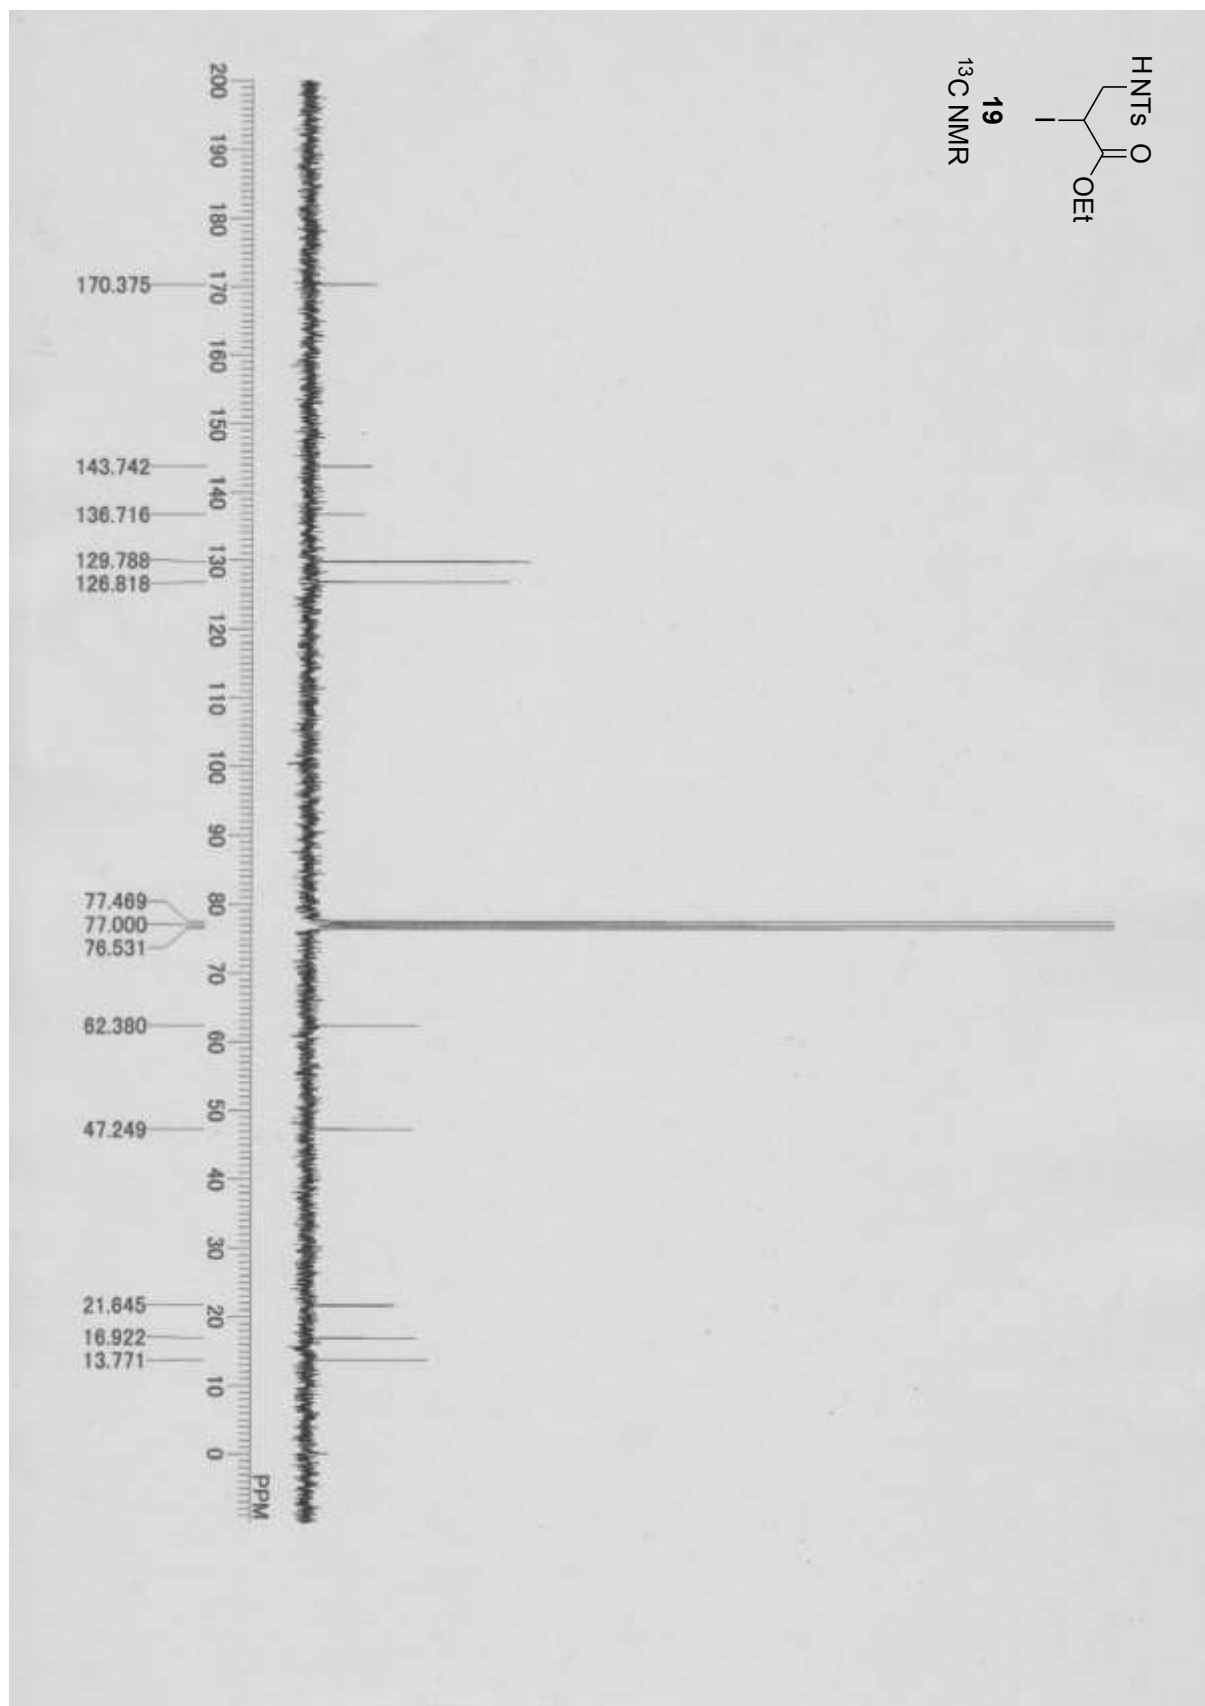

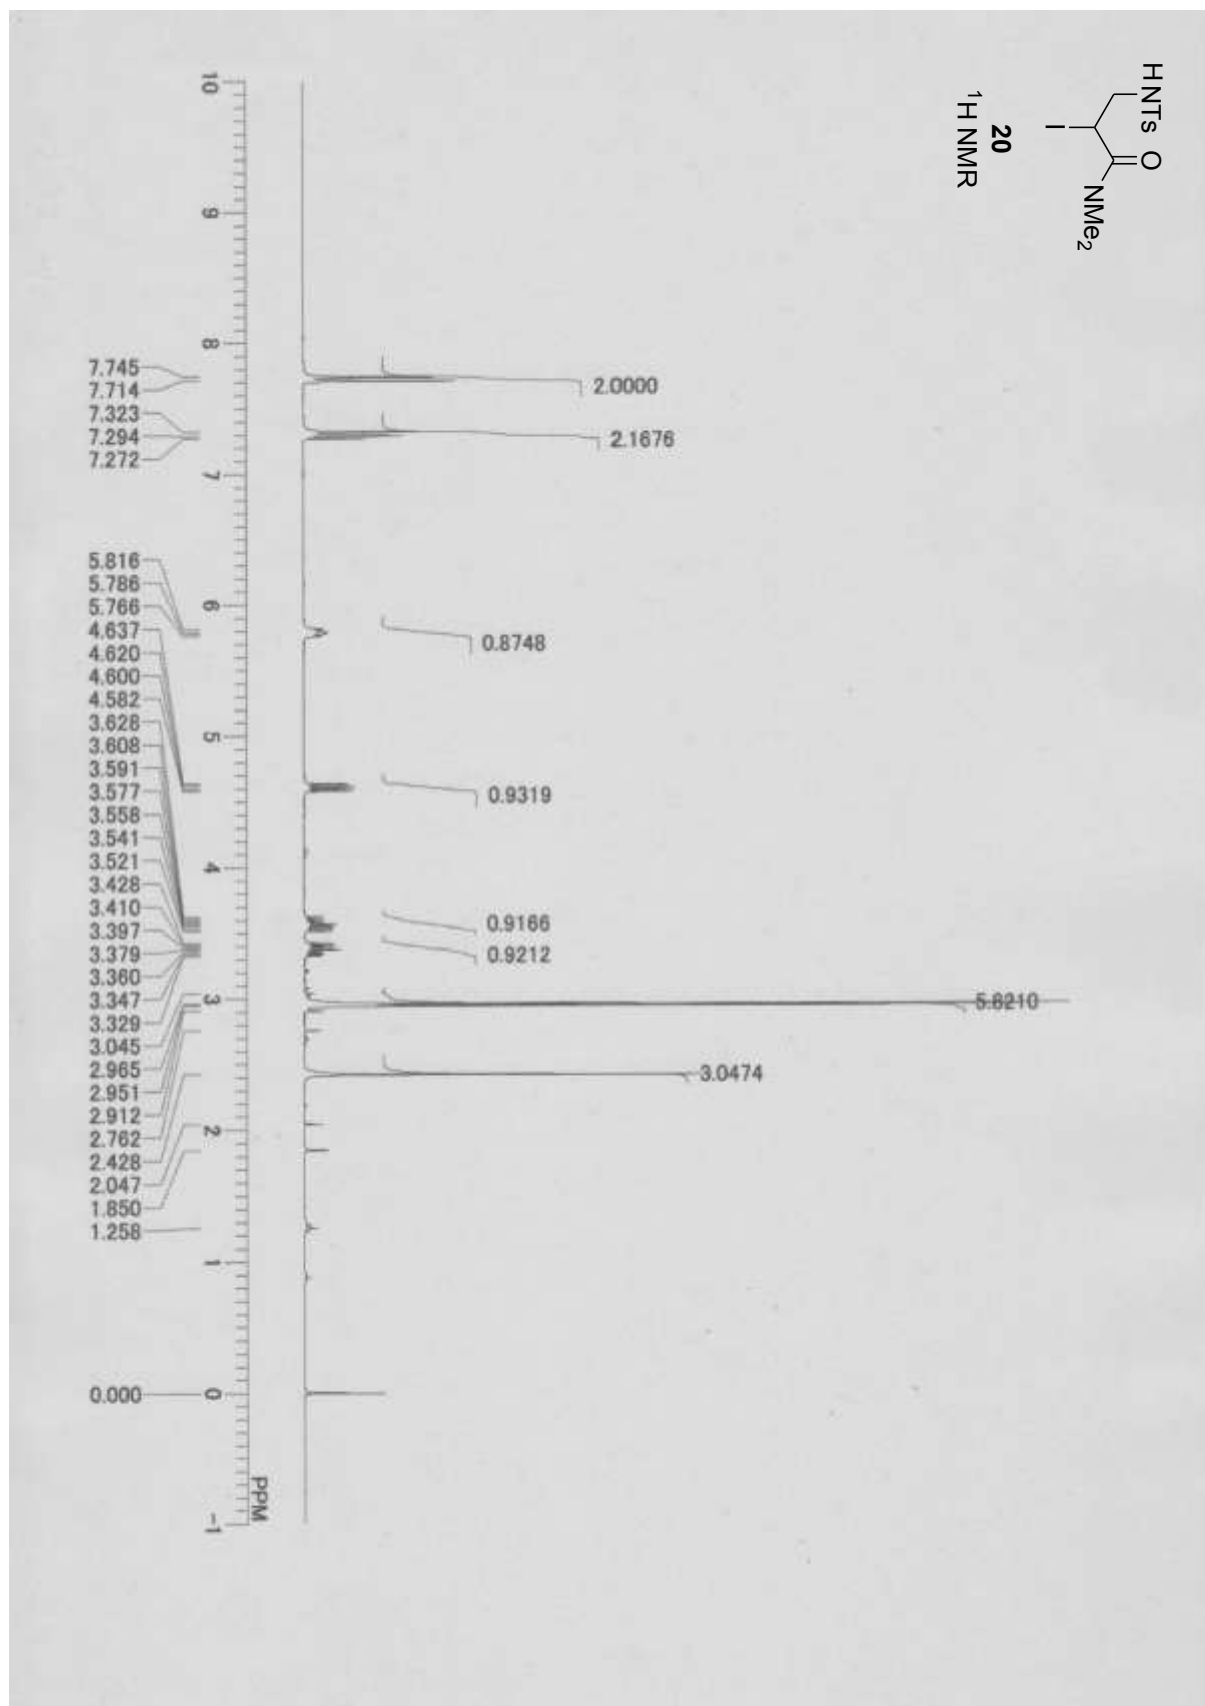

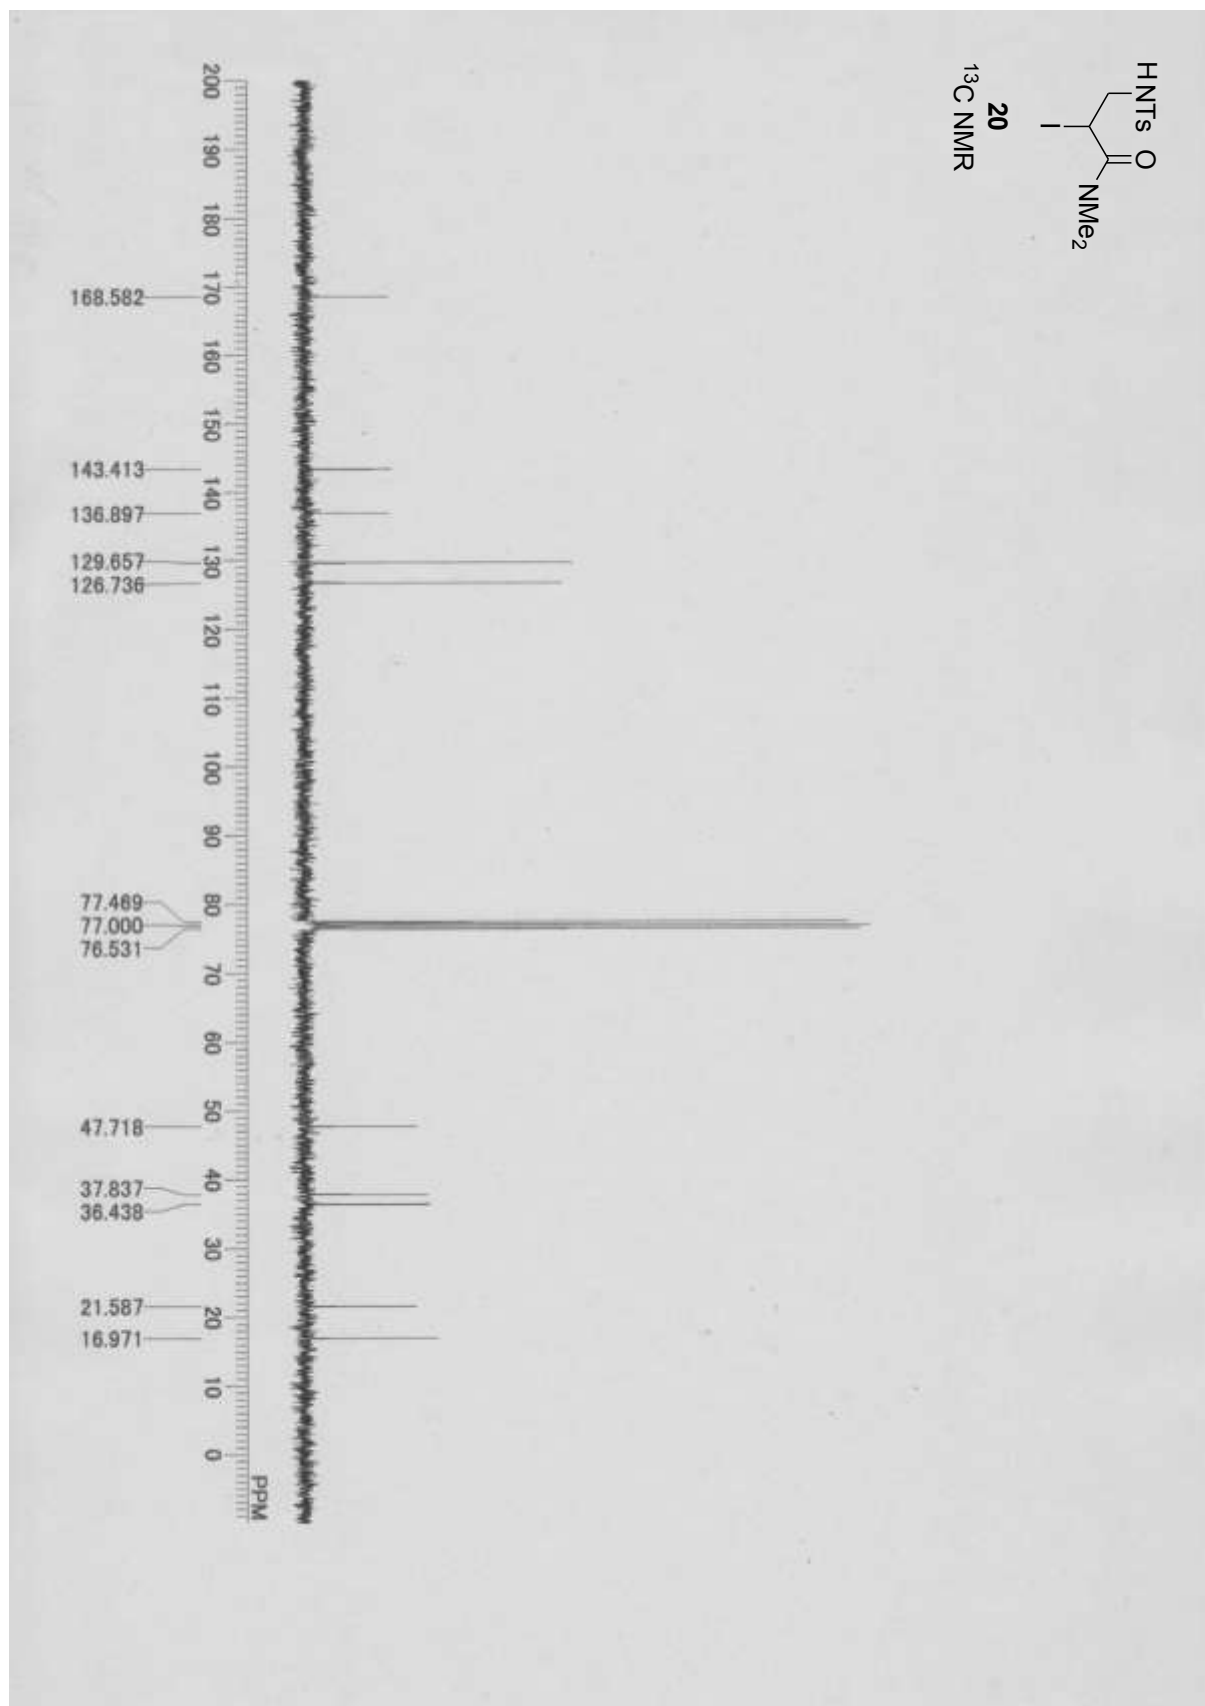

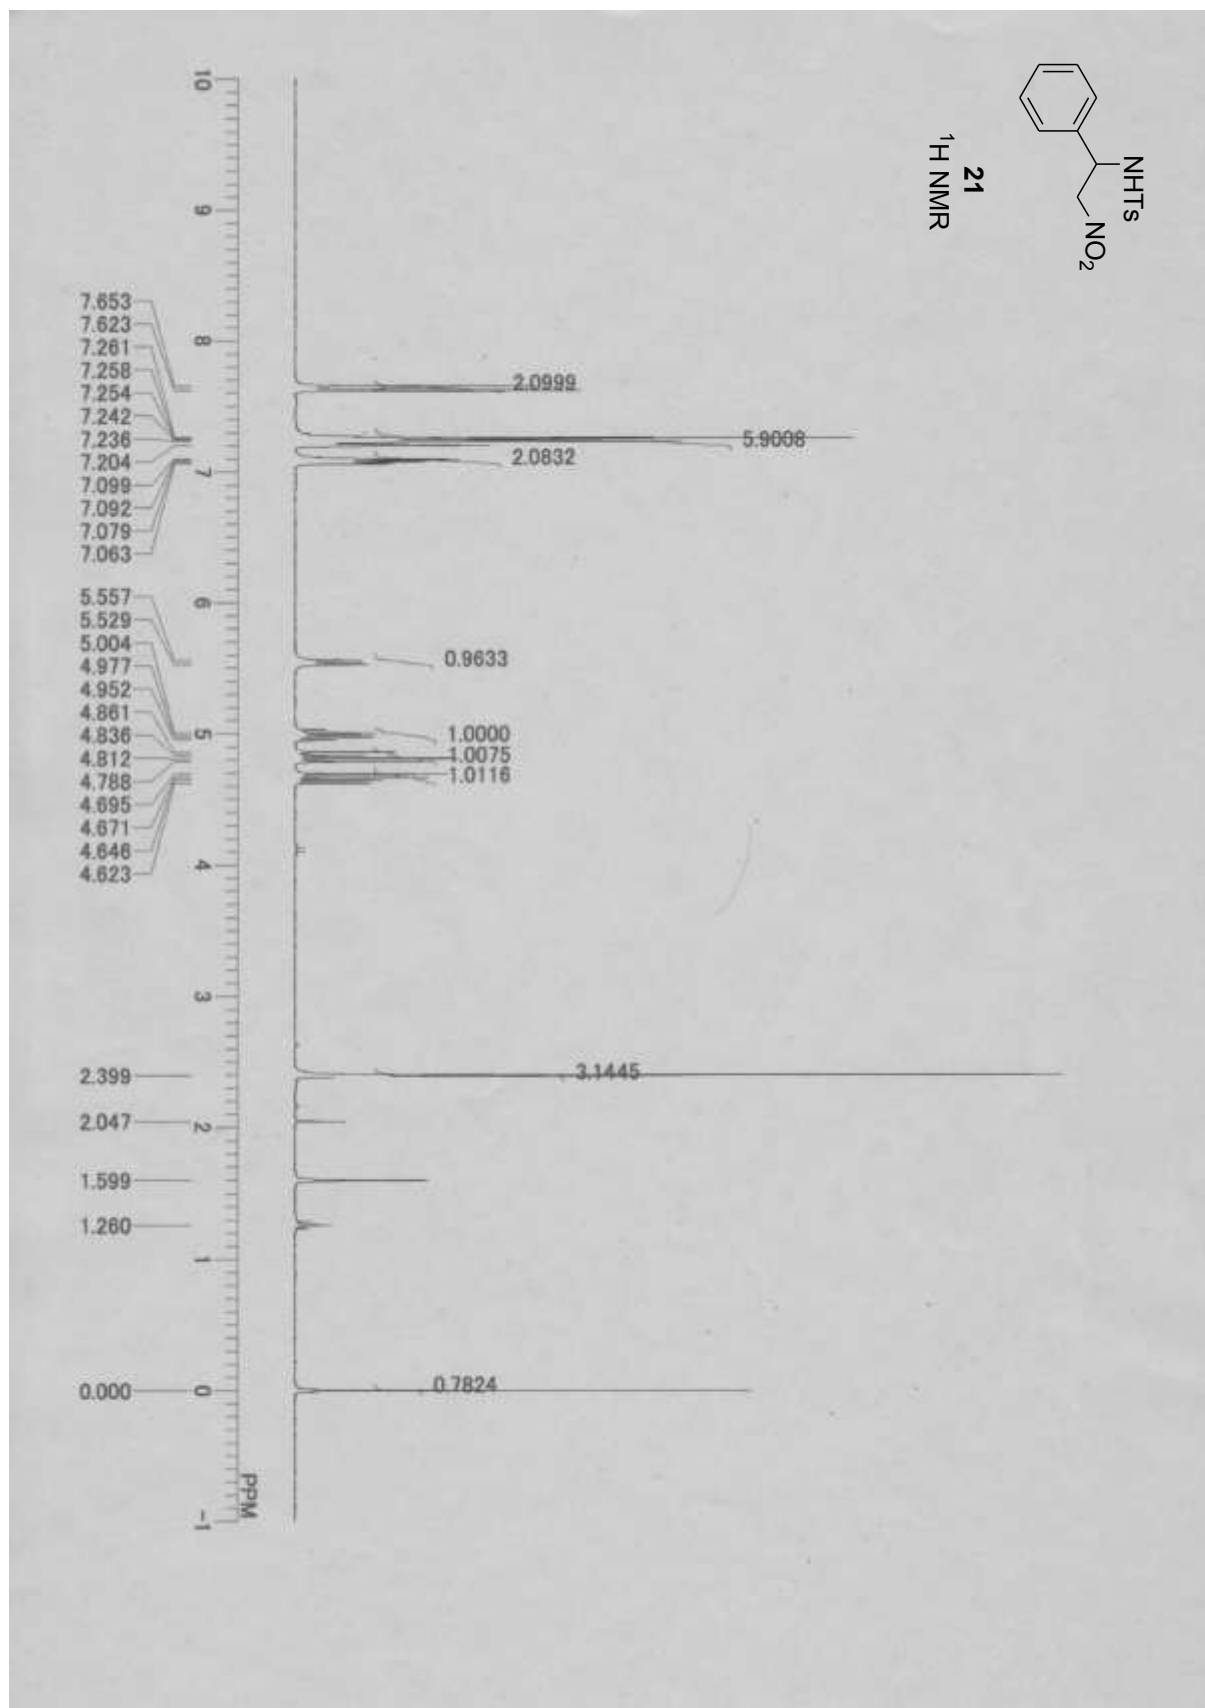



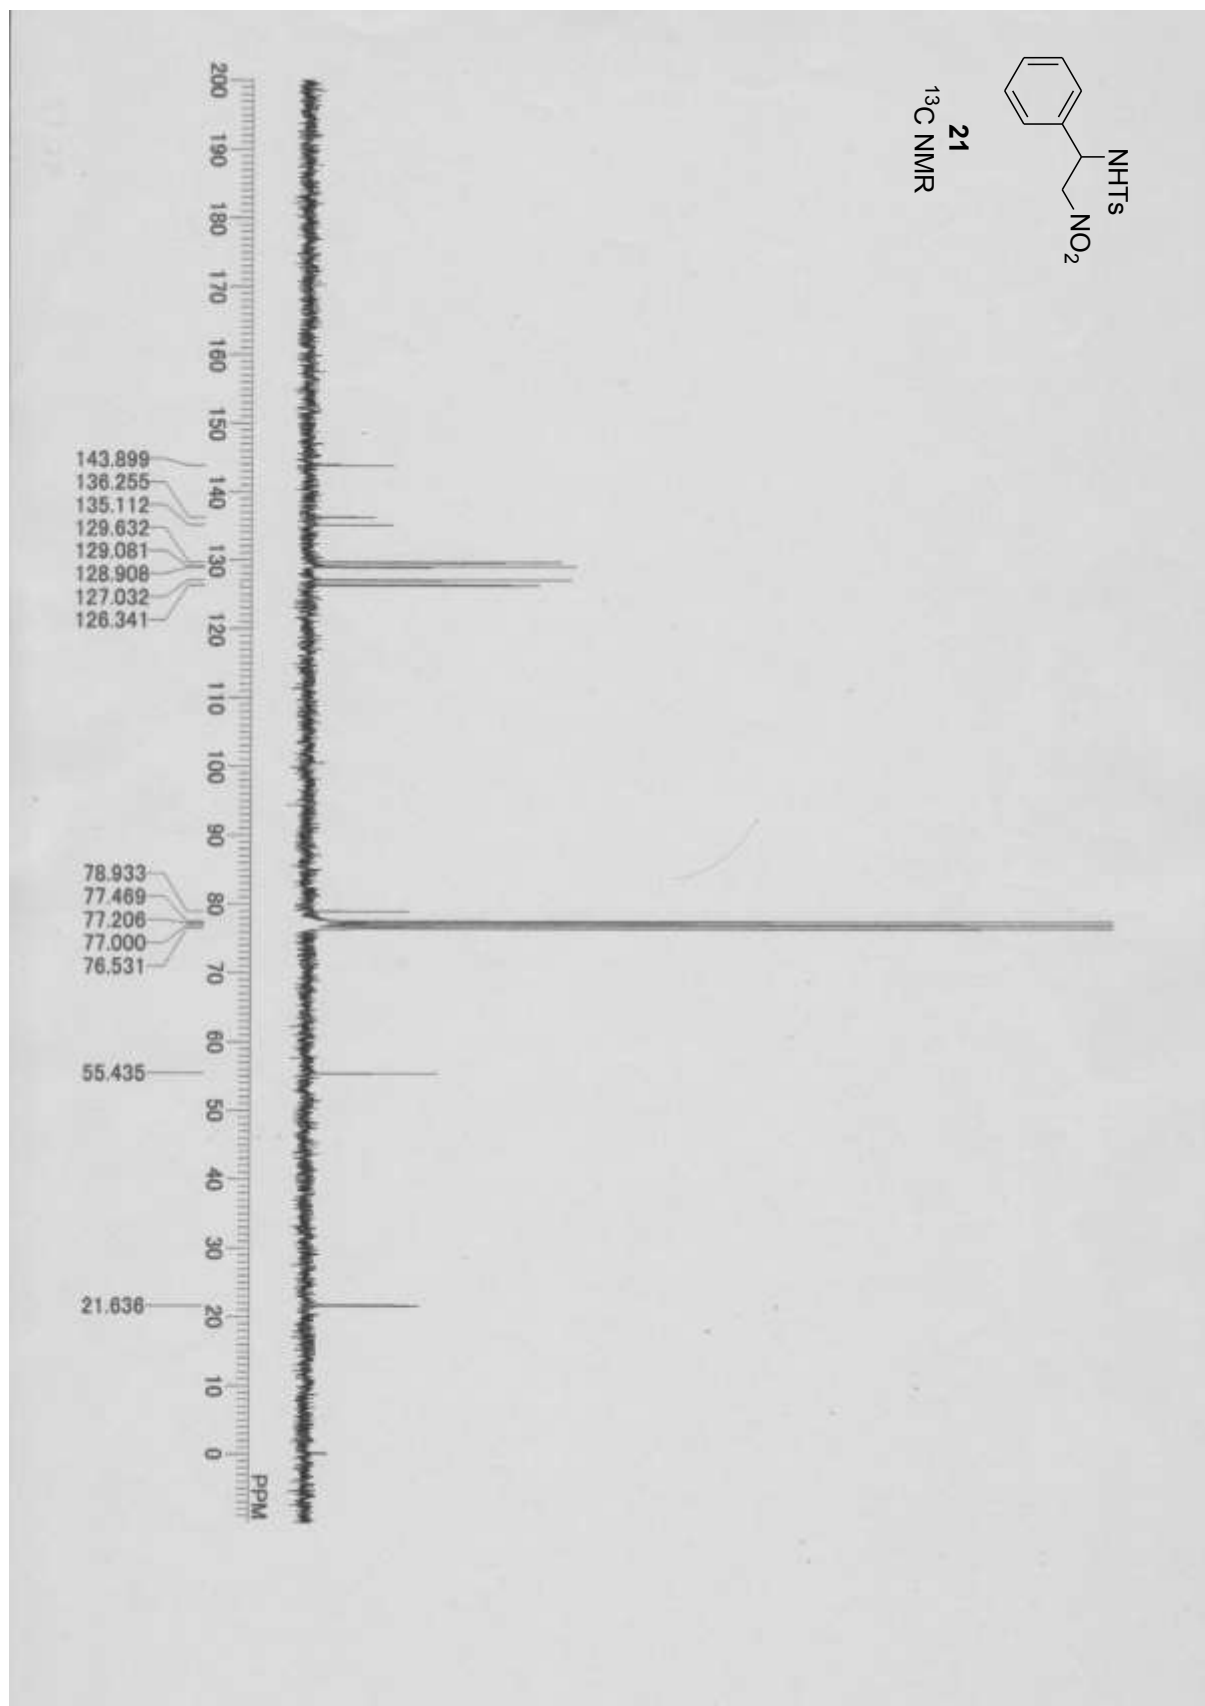

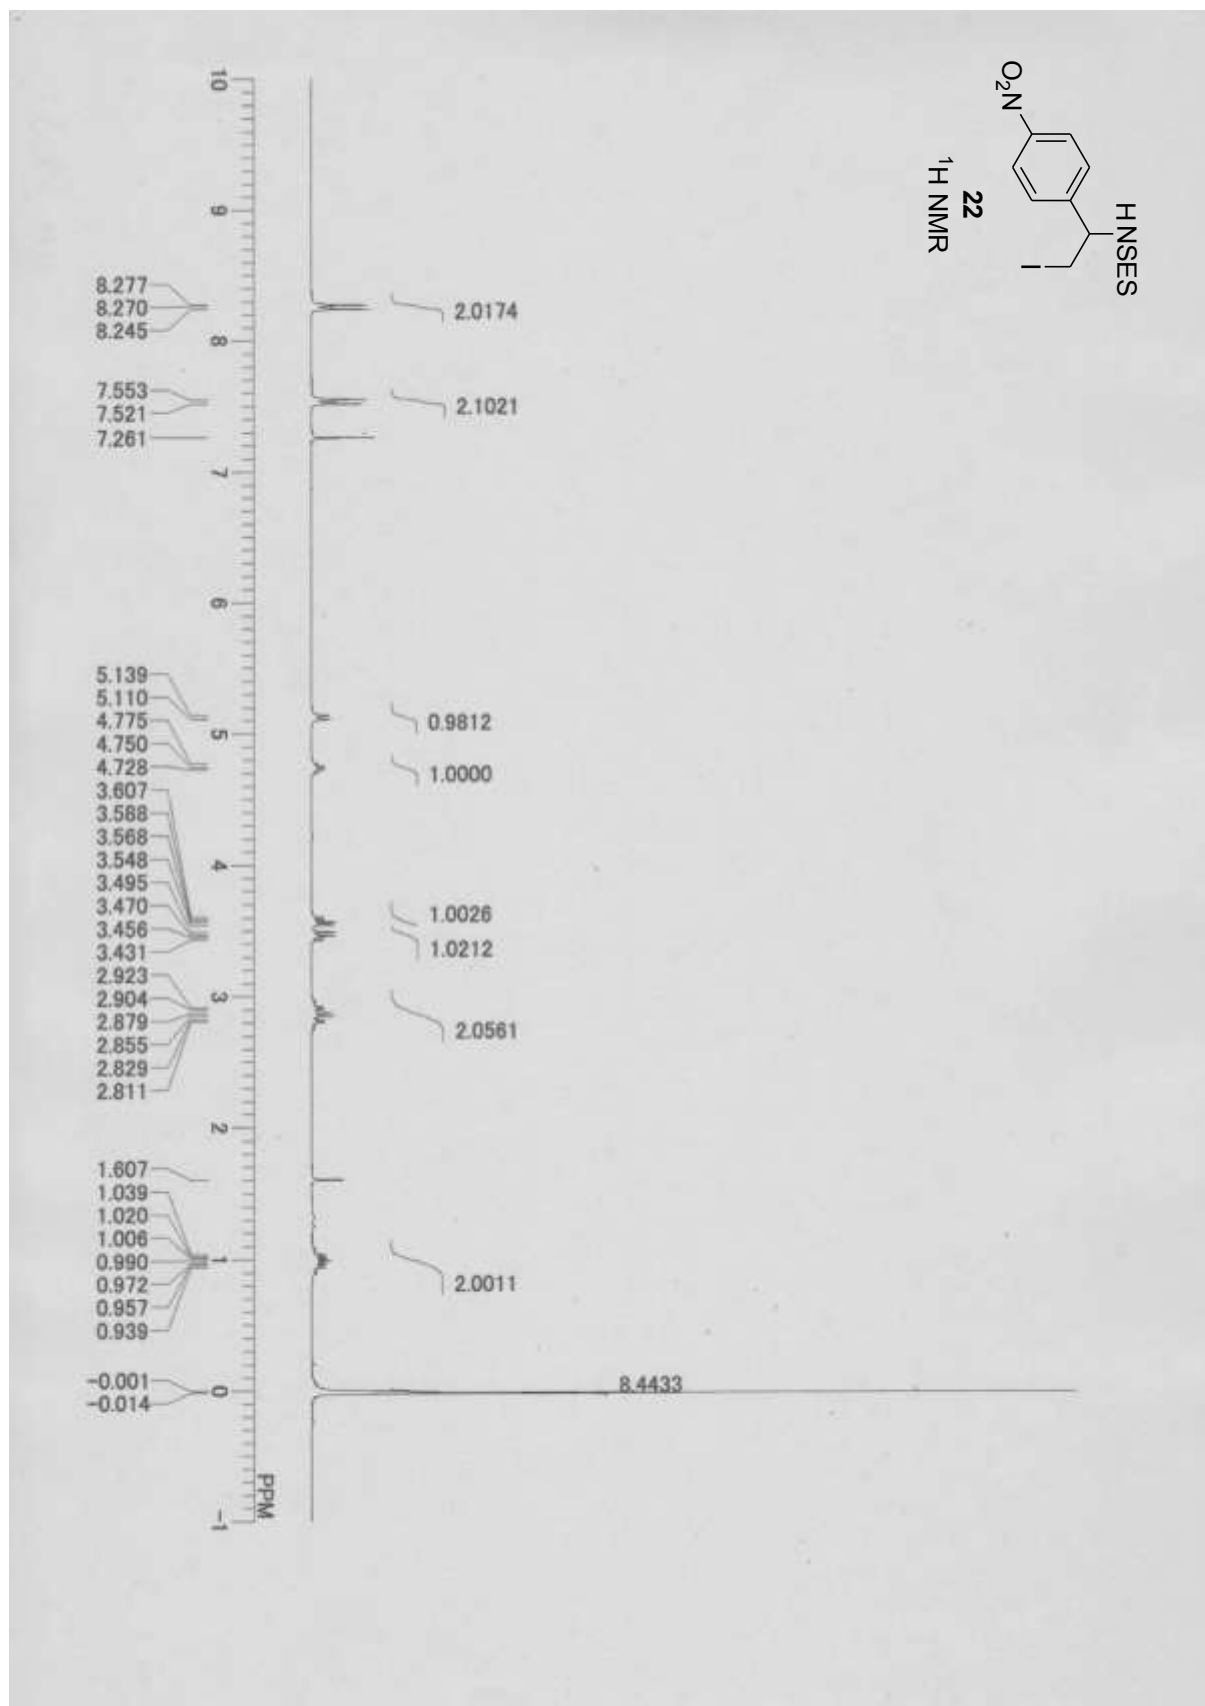

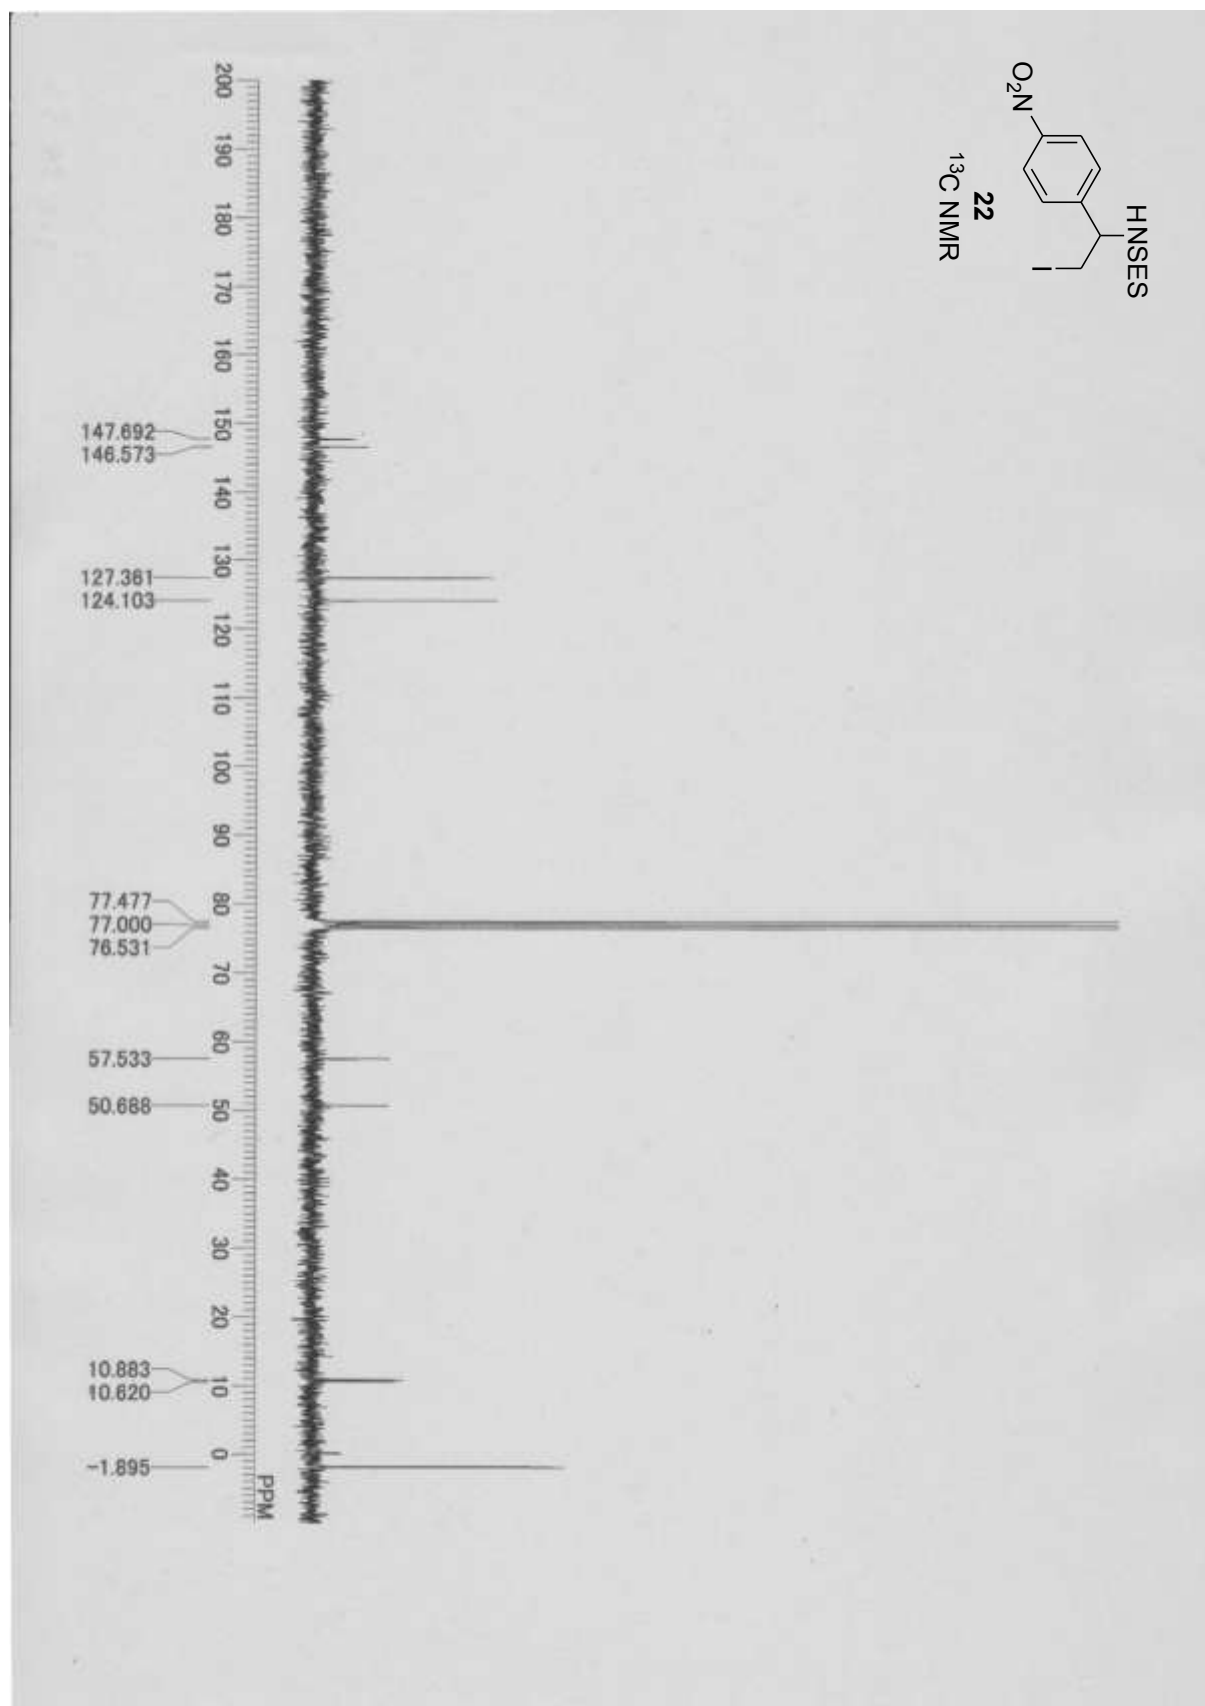

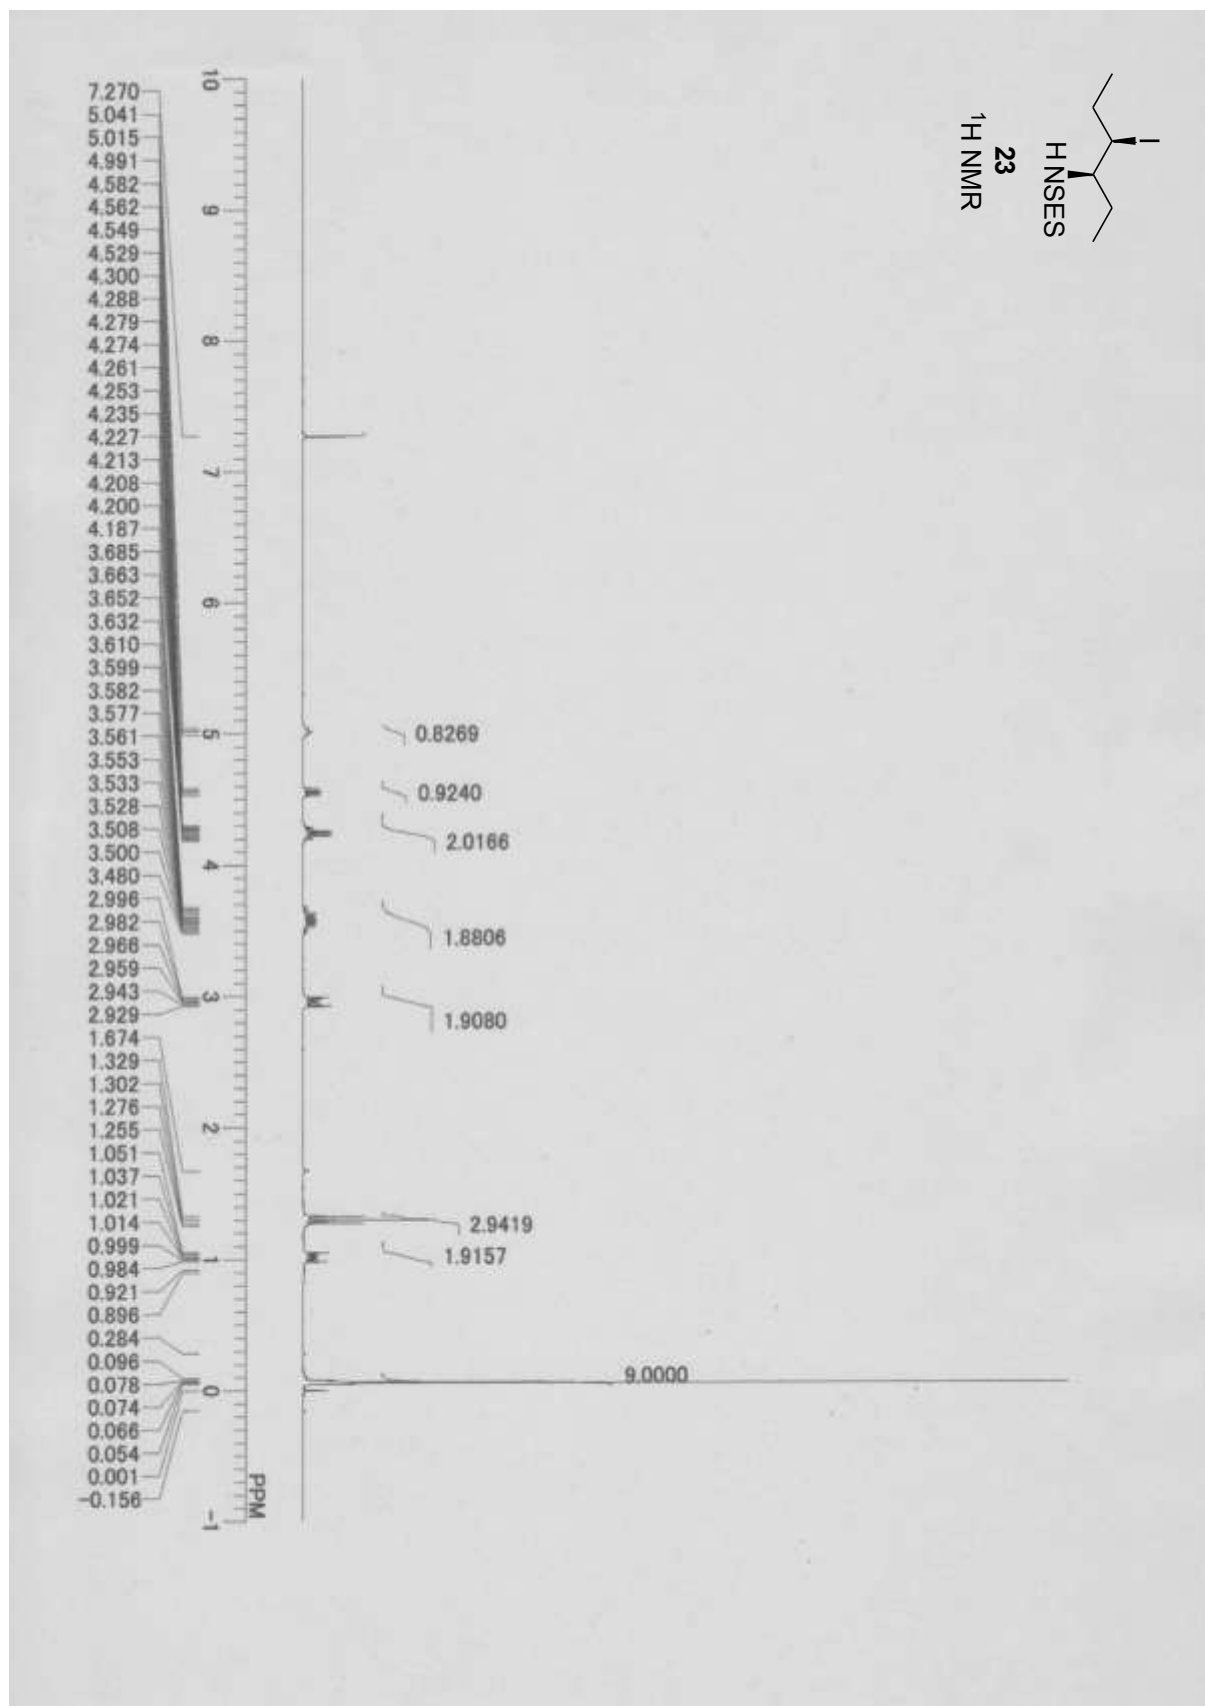

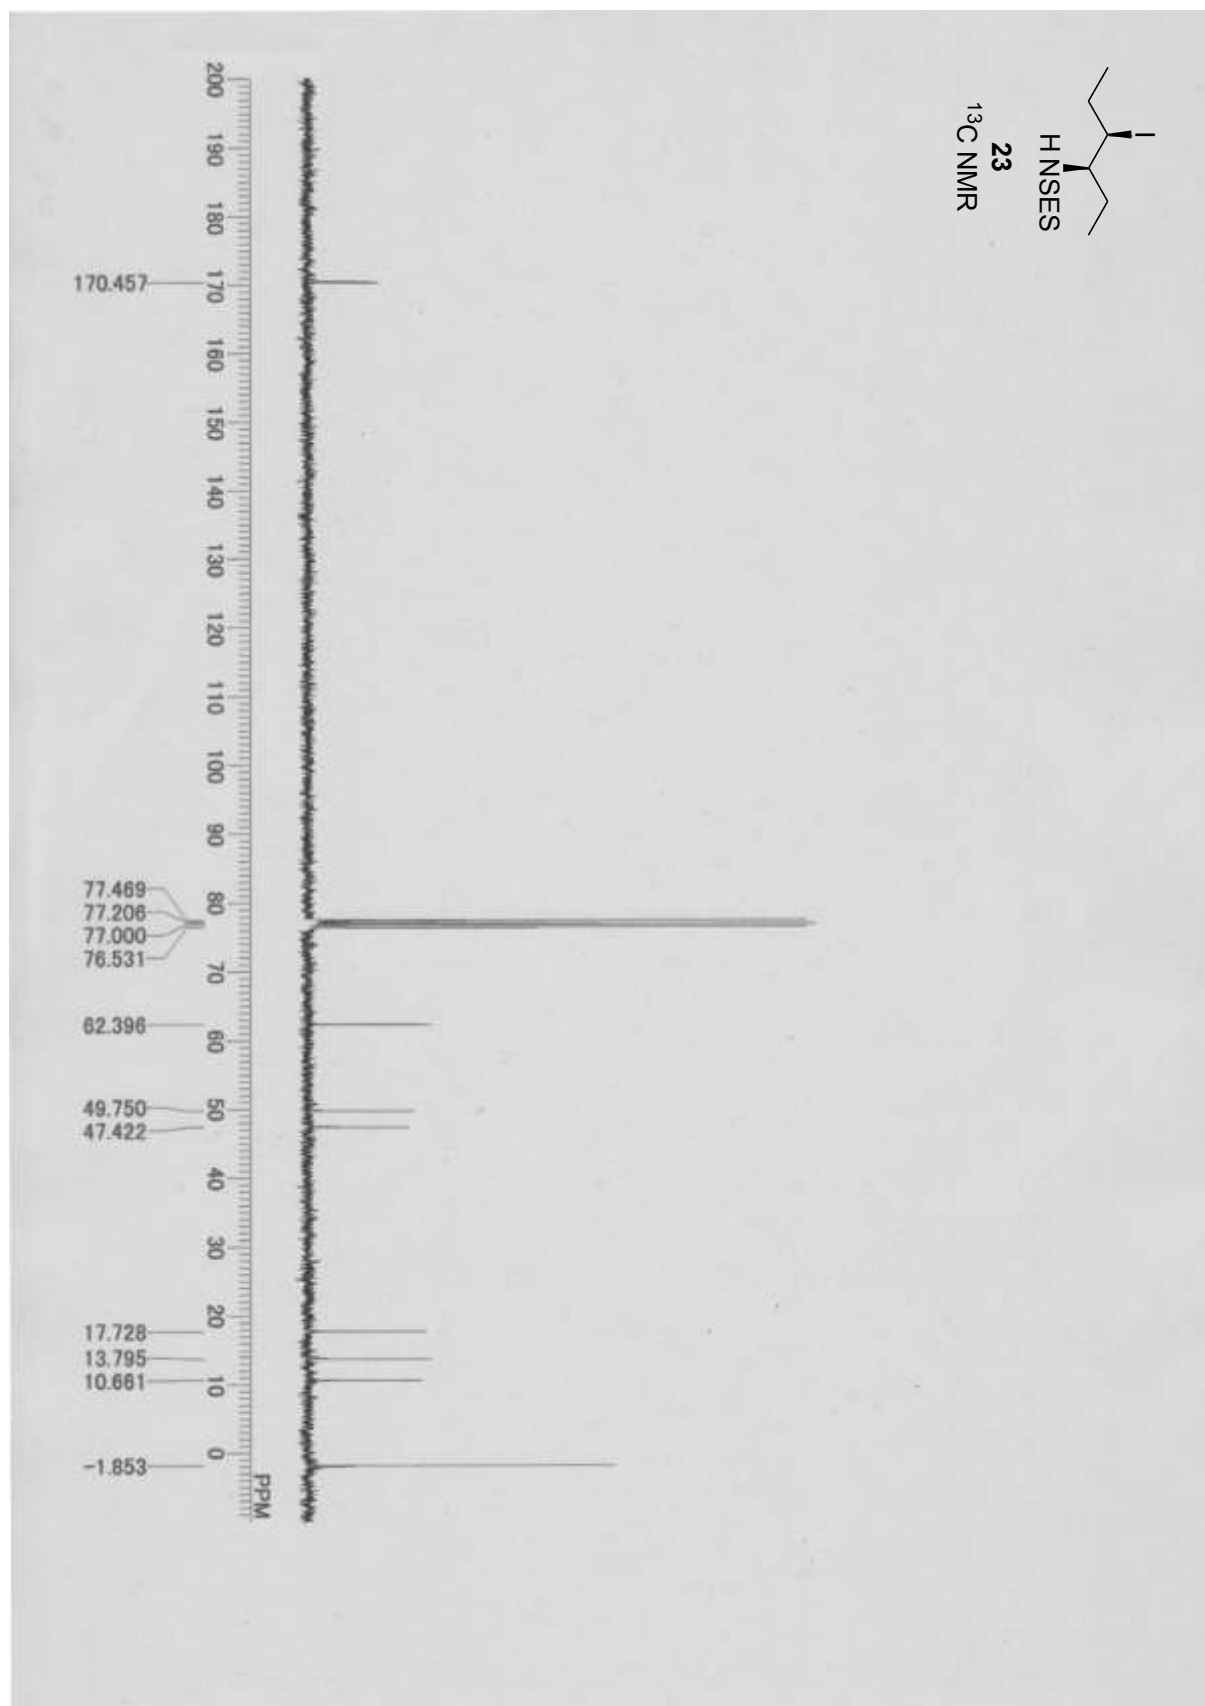

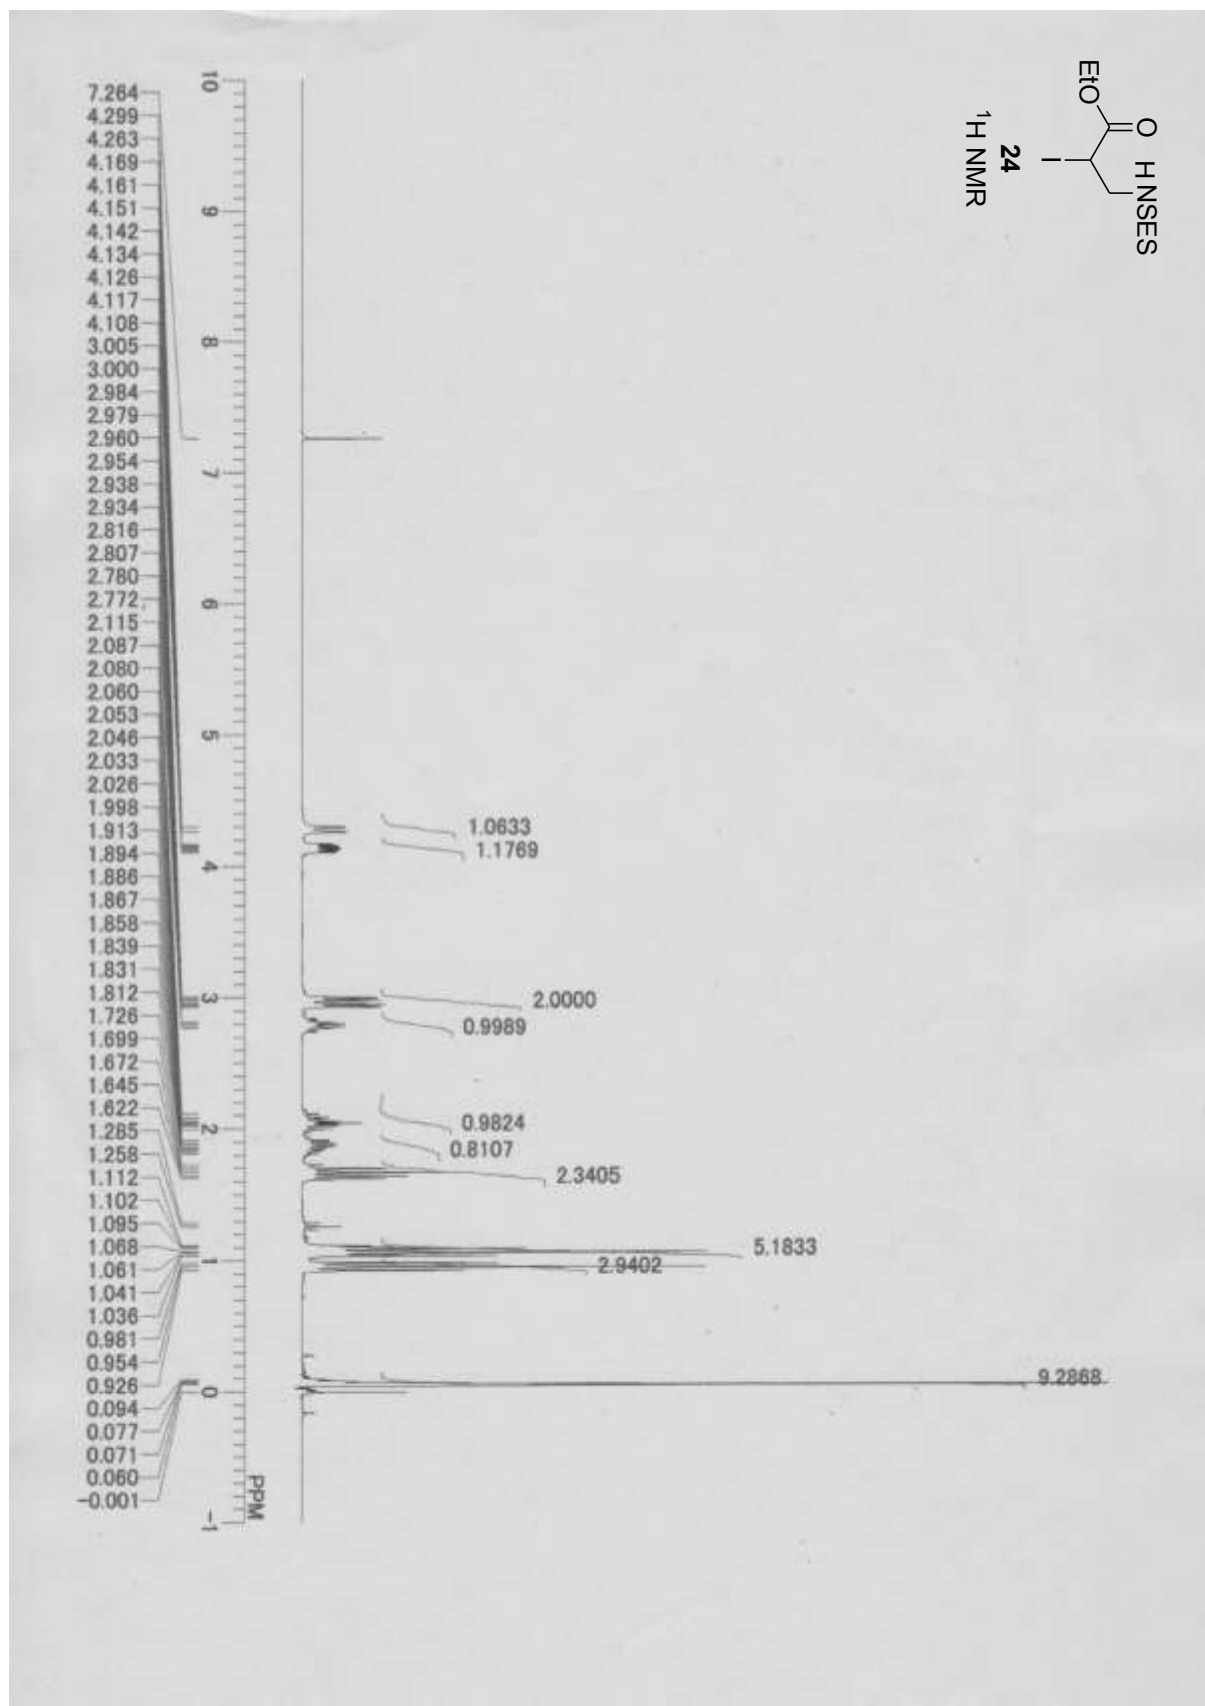

Supplement: c0cc03855e.pdf [file c0cc03855e.pdf]
